# Supplementary material
Source: MDPI journal article supplement (https://www.mdpi.com/2073-4441/15/3/548)
Supplement: s1 [file s1]

# Supplementary Materials

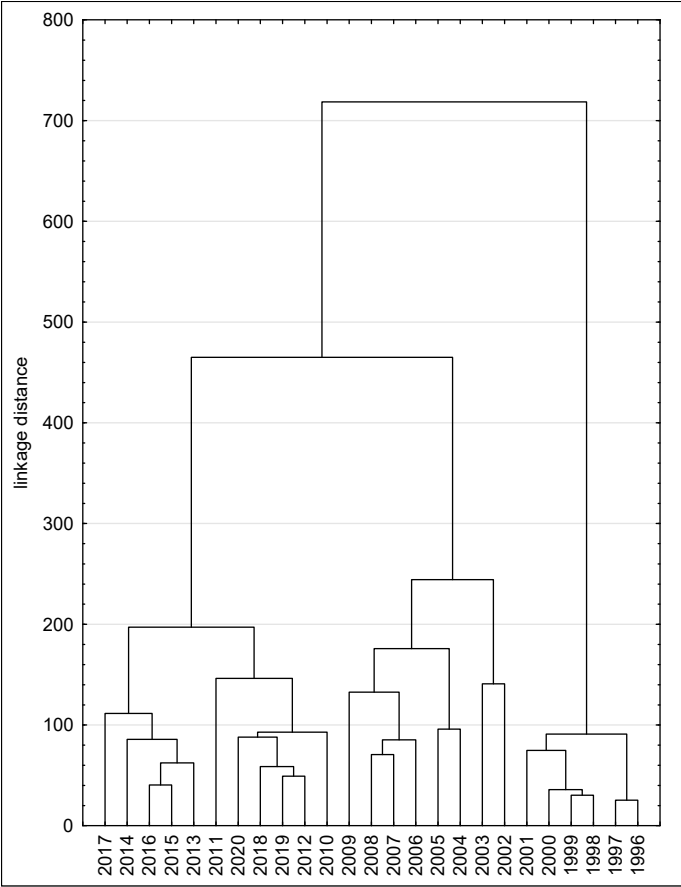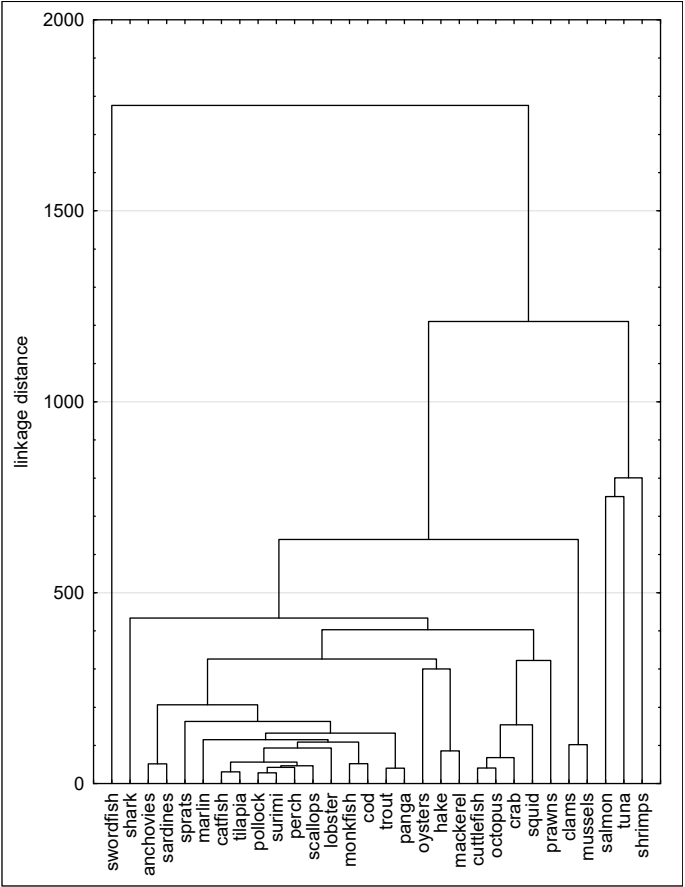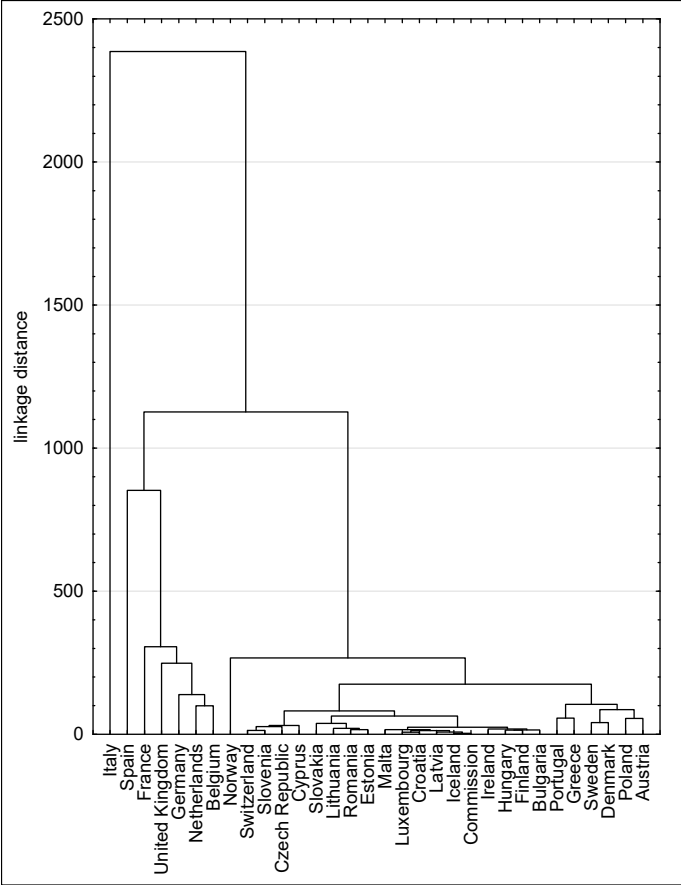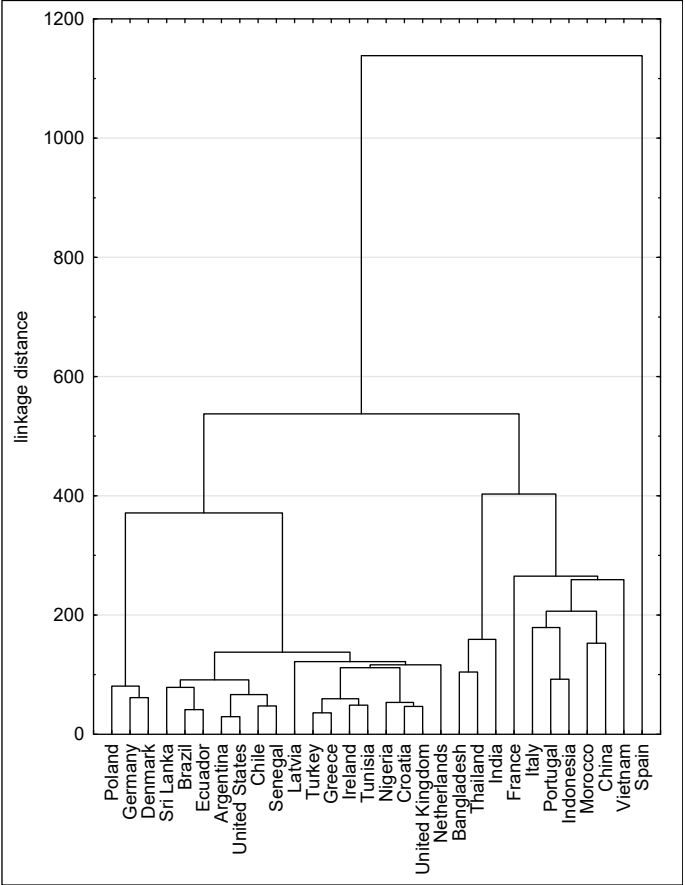

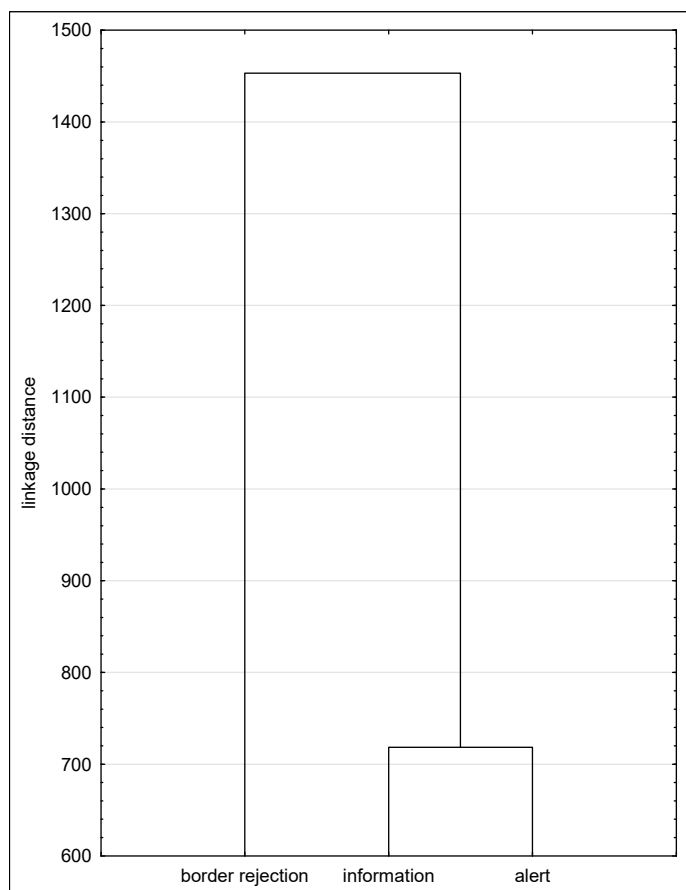

(e)

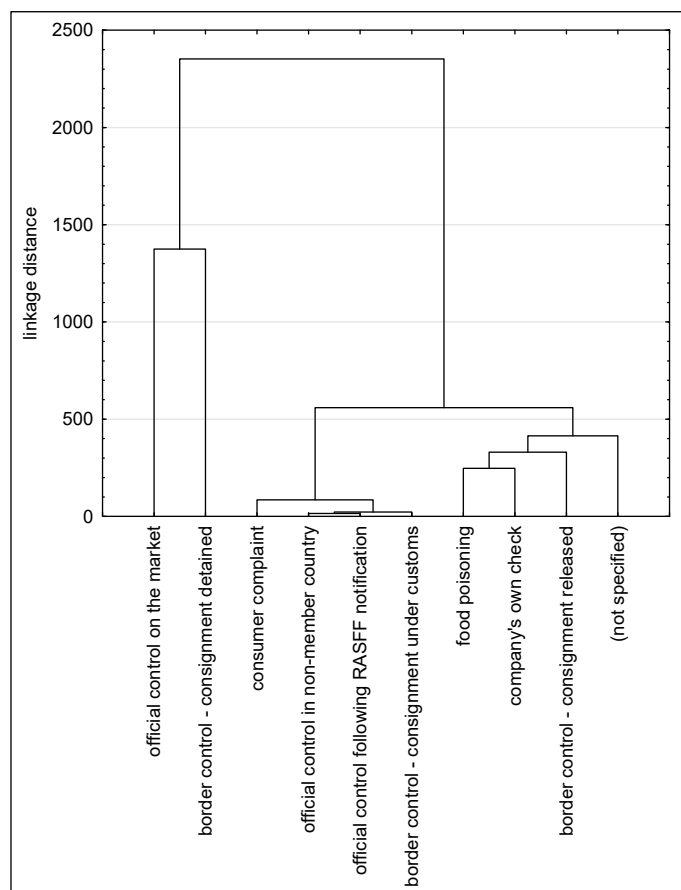

(f)

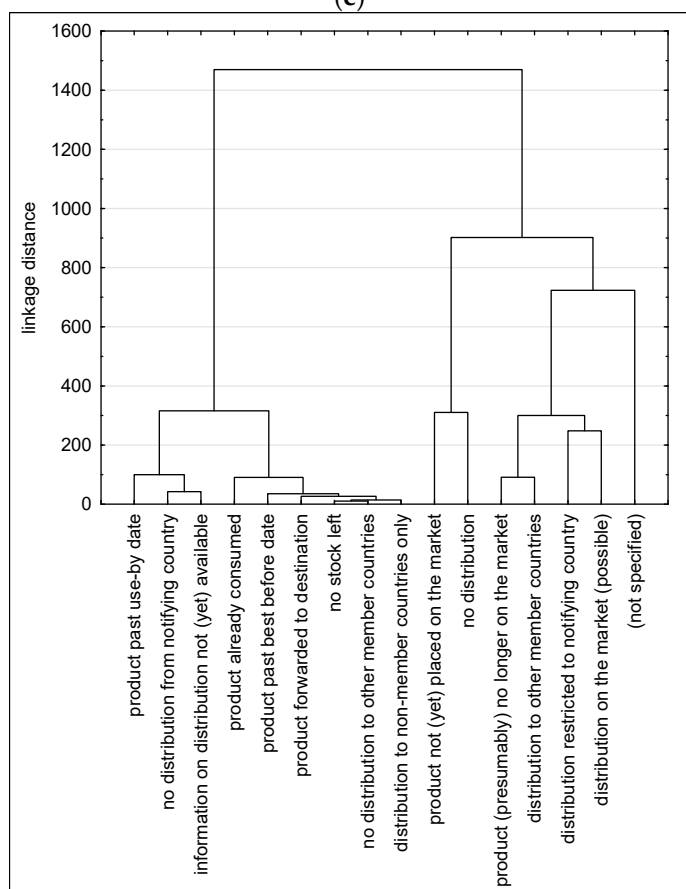

(g)

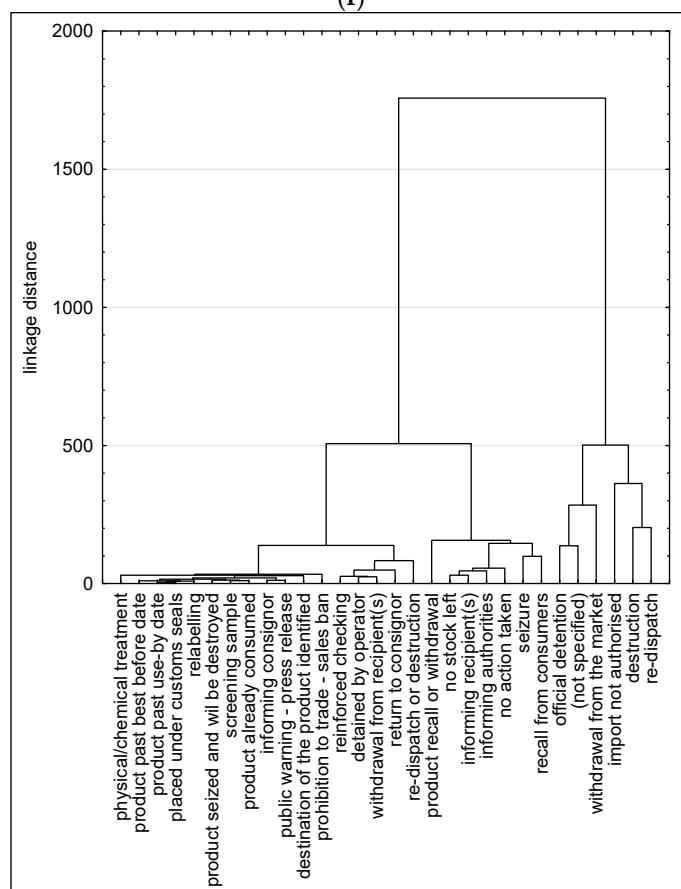

(h)

**Figure S1.** Results of joining cluster analysis; (a) year; (b) product; (c) notifying country; (d) country of origin; (e) notification type; (f) notification basis; (g) distribution status; (h) action taken.

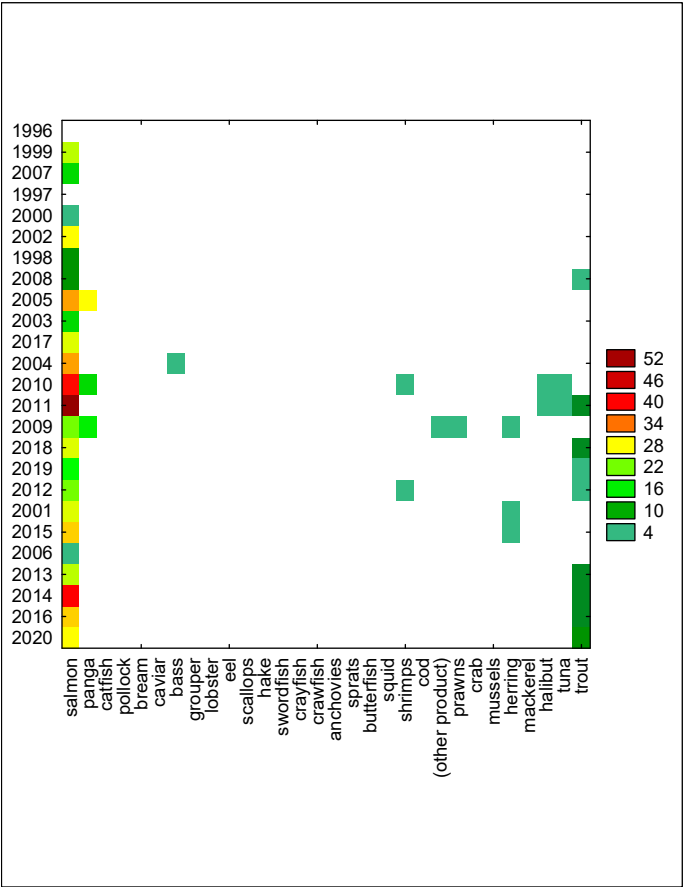

(a)

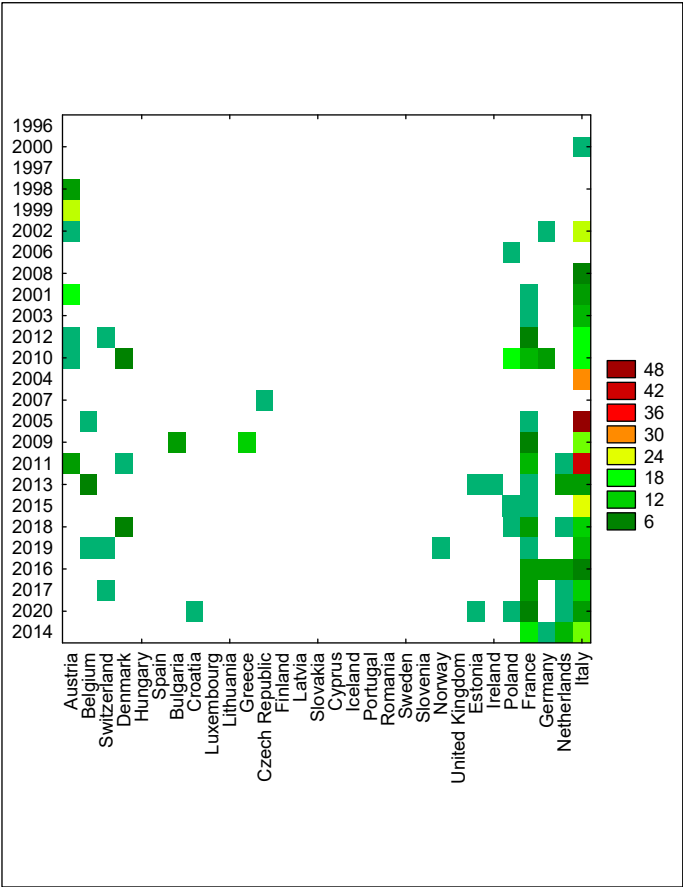

(b)

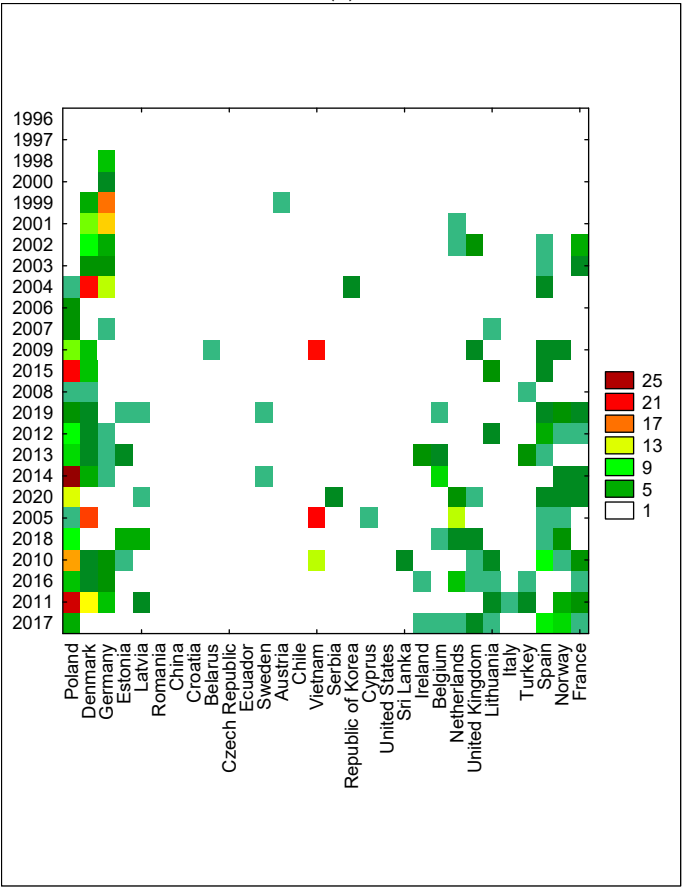

(c)

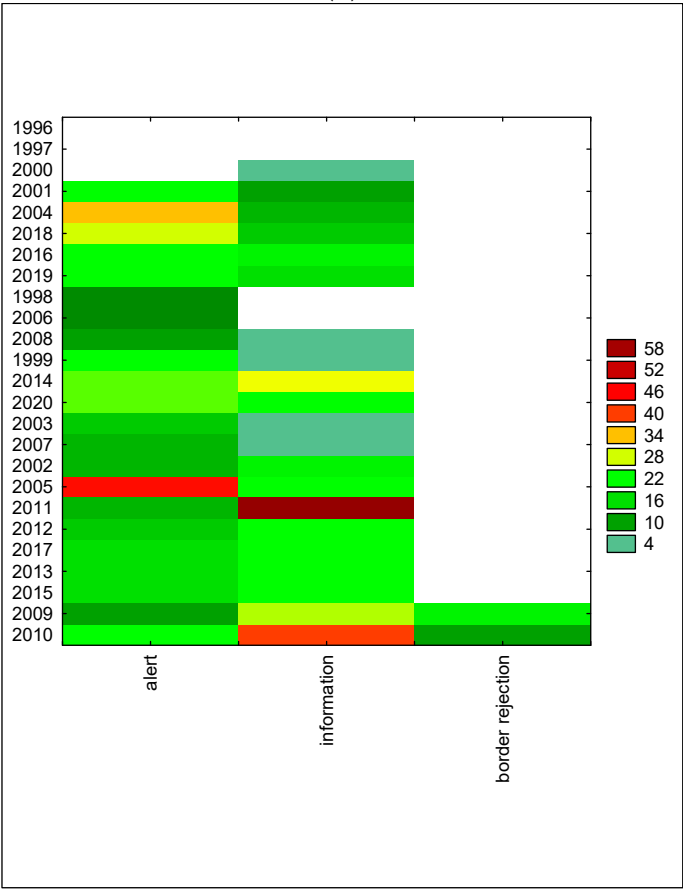

(d)

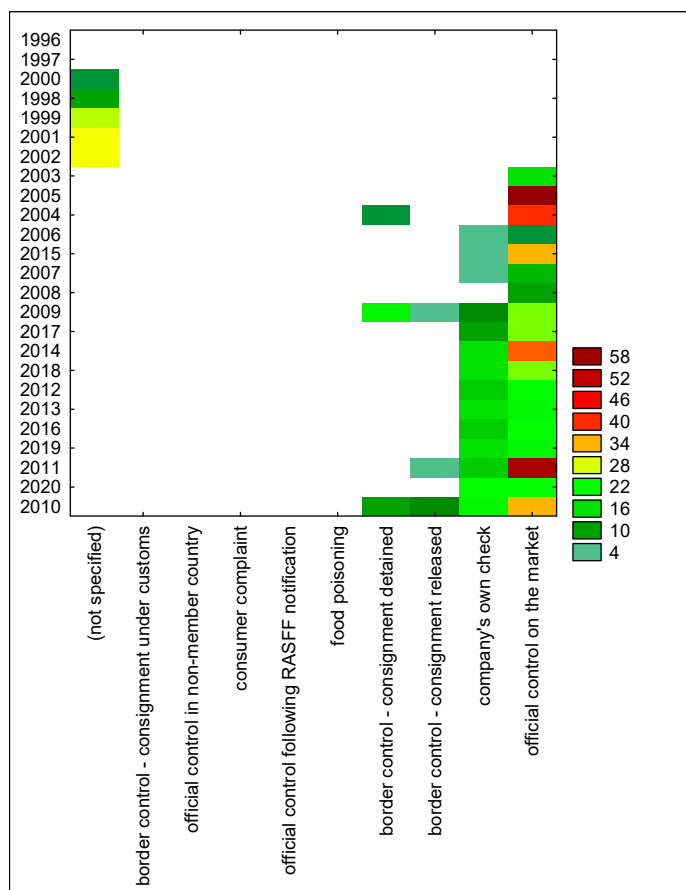

(e)

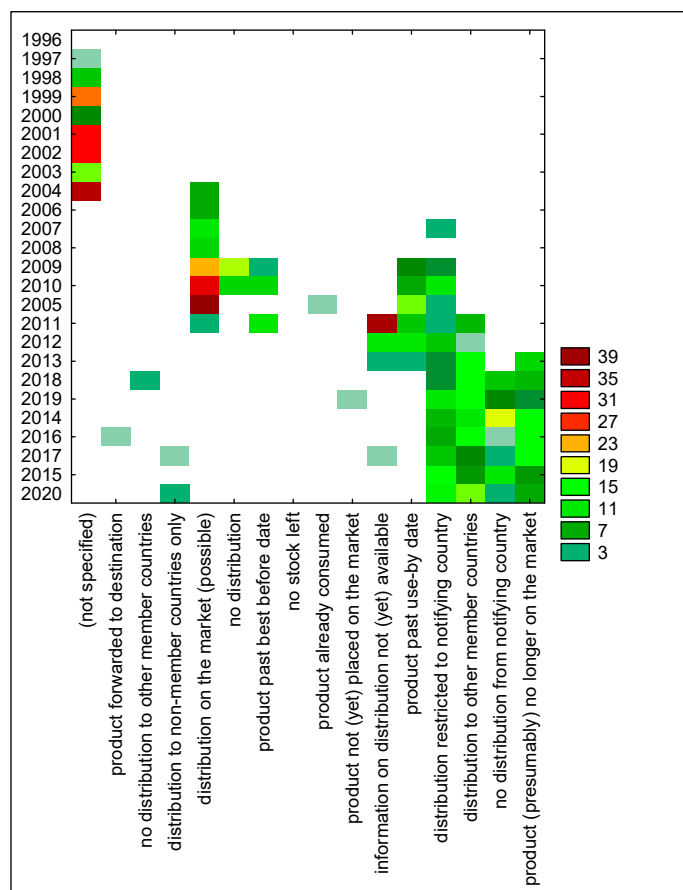

(f)

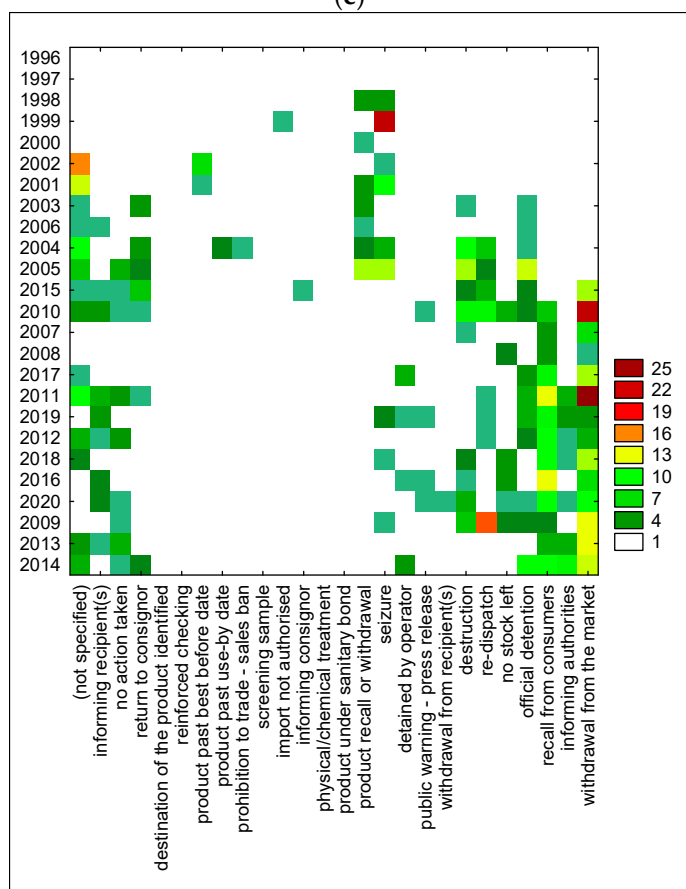

(g)

**Figure S2.** Results of two-way joining cluster analysis related to *Listeria*; (a) product; (b) notifying country; (c) country of origin; (d) notification type; (e) notification basis; (f) distribution status; (g) action taken.

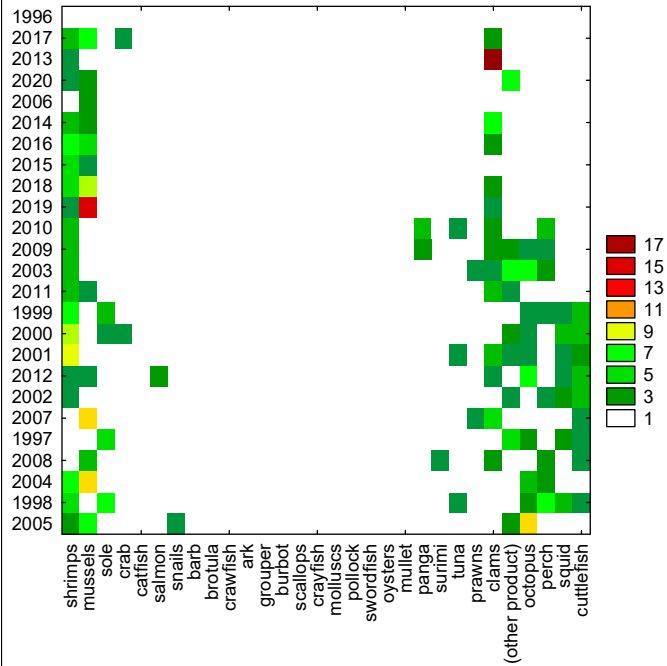

(a)

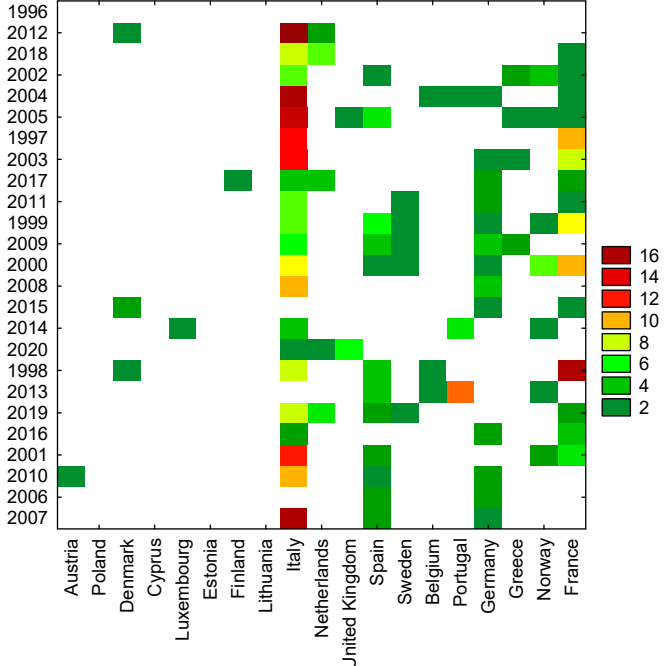

(b)

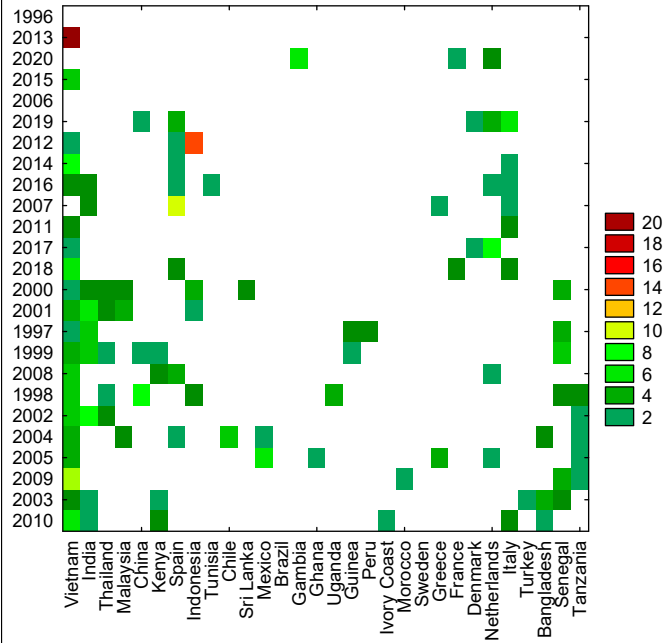

(c)

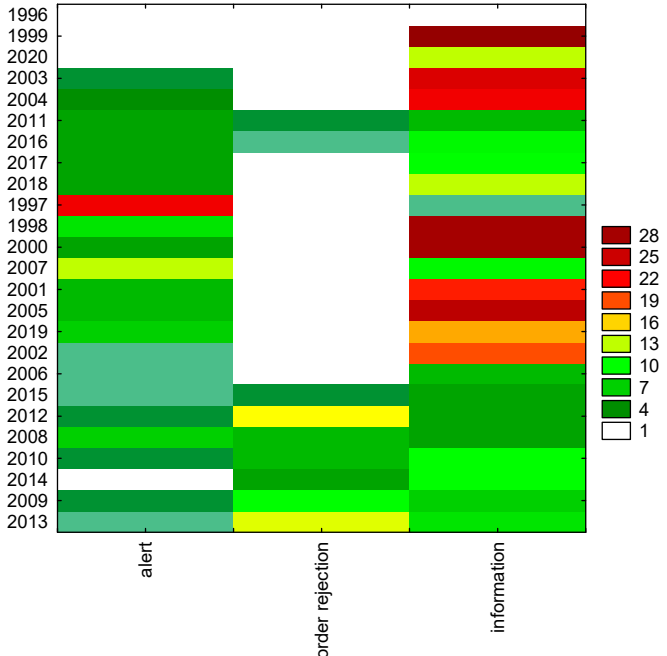

(d)

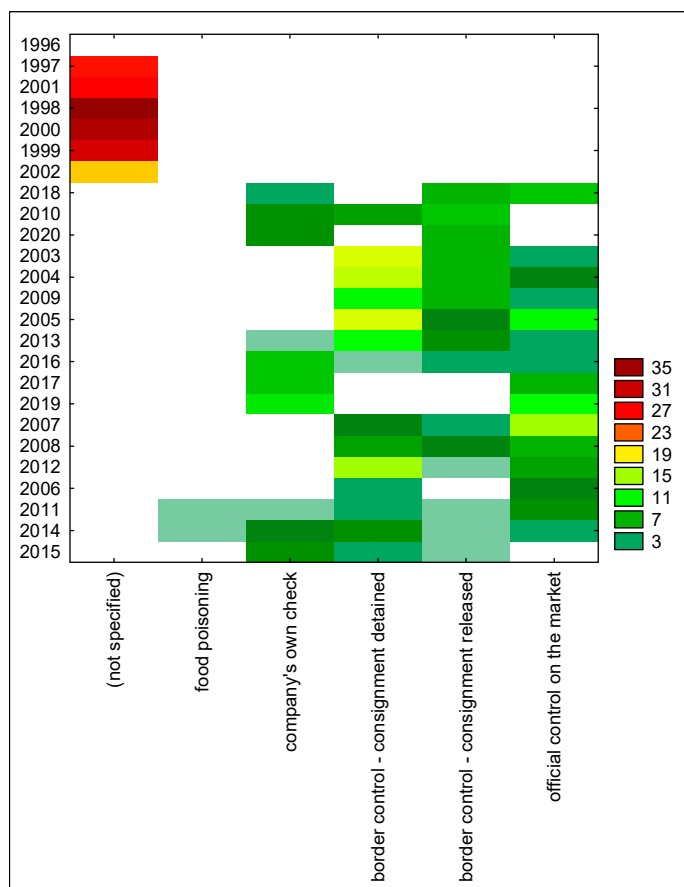

(e)

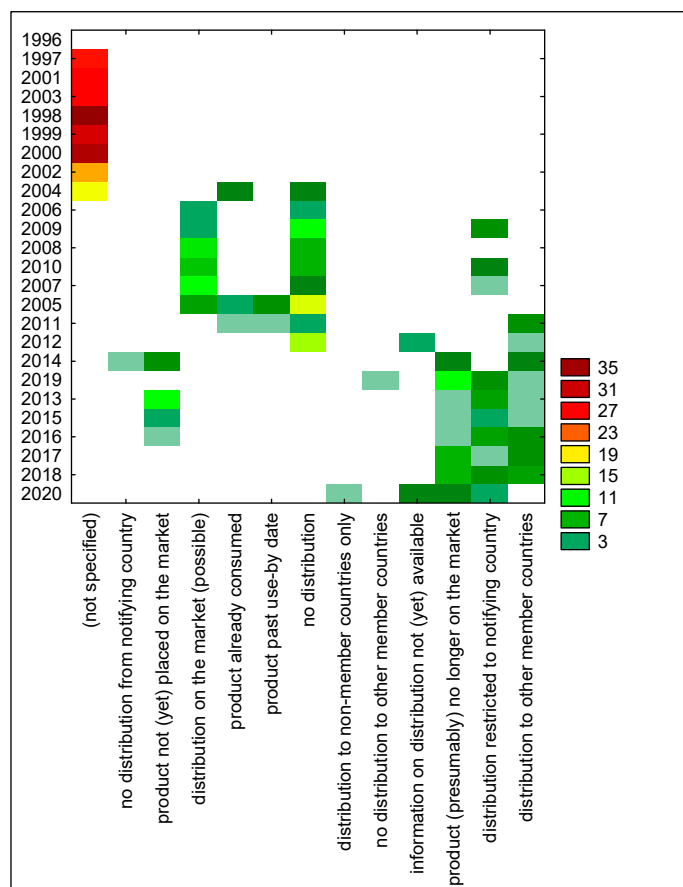

(f)

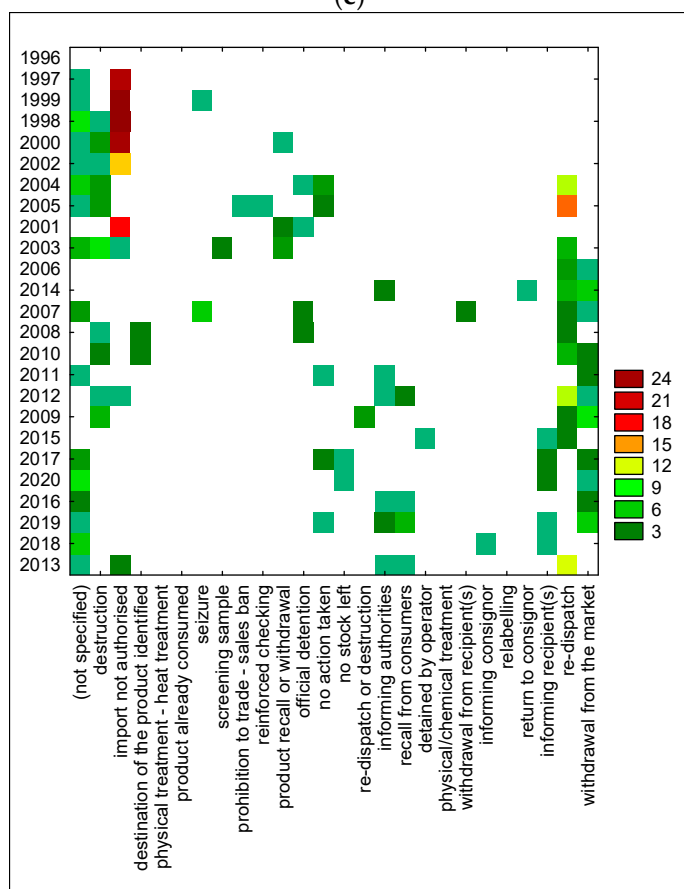

(g)

**Figure S3.** Results of two-way joining cluster analysis related to *Salmonella*; (a) product; (b) notifying country; (c) country of origin; (d) notification type; (e) notification basis; (f) distribution status; (g) action taken.

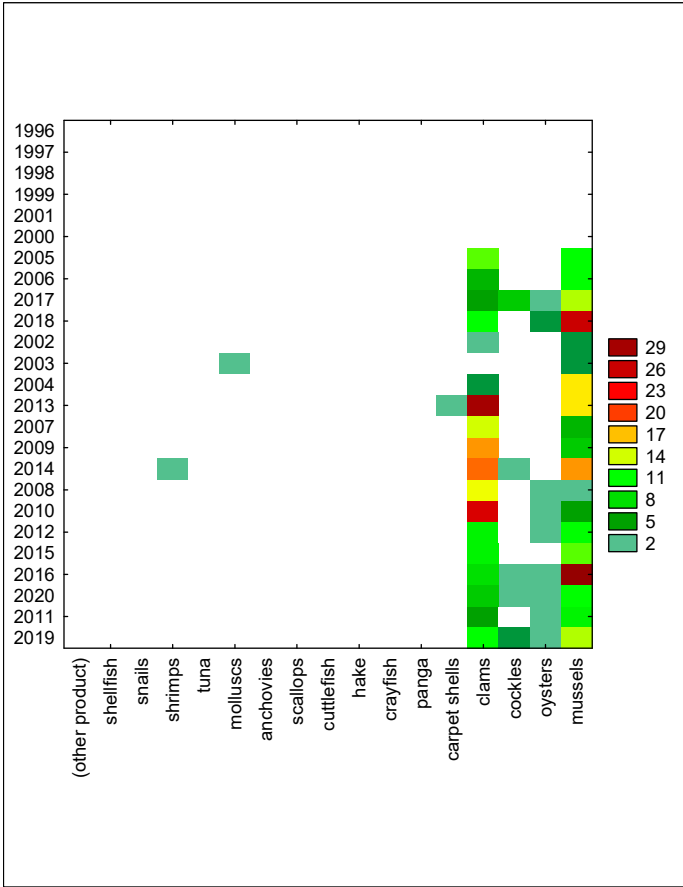

(a)

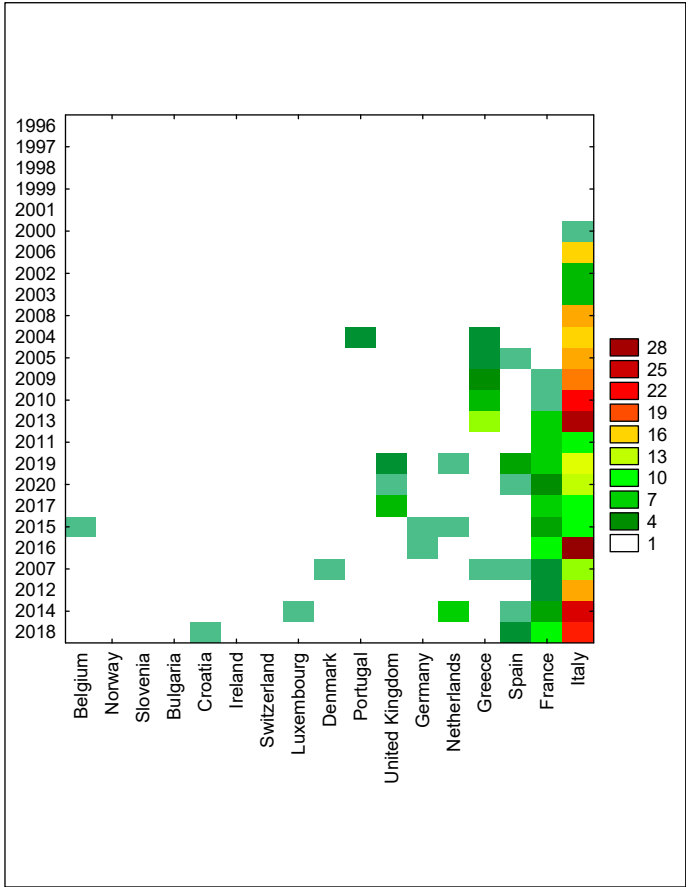

(b)

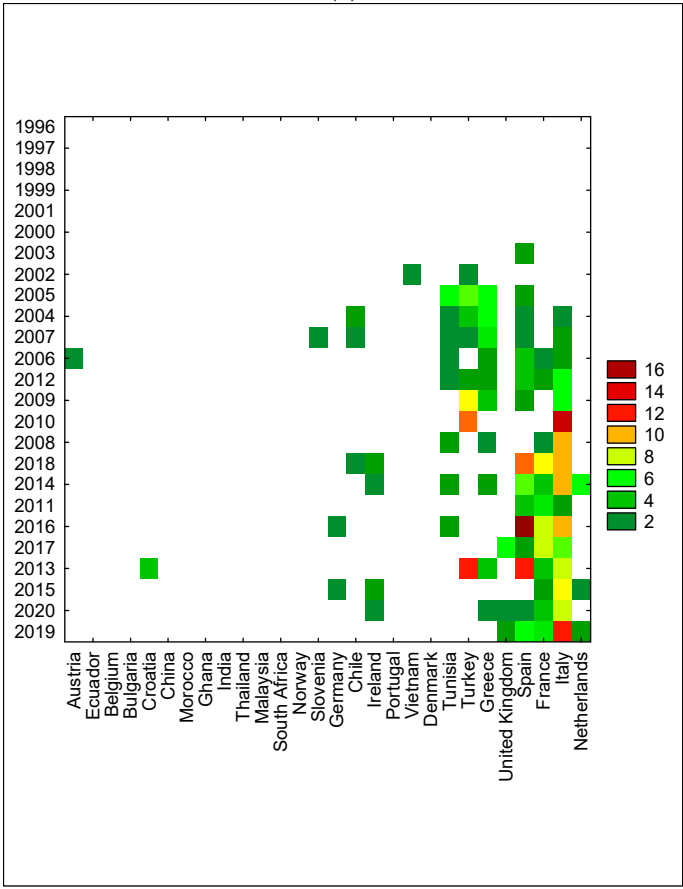

(c)

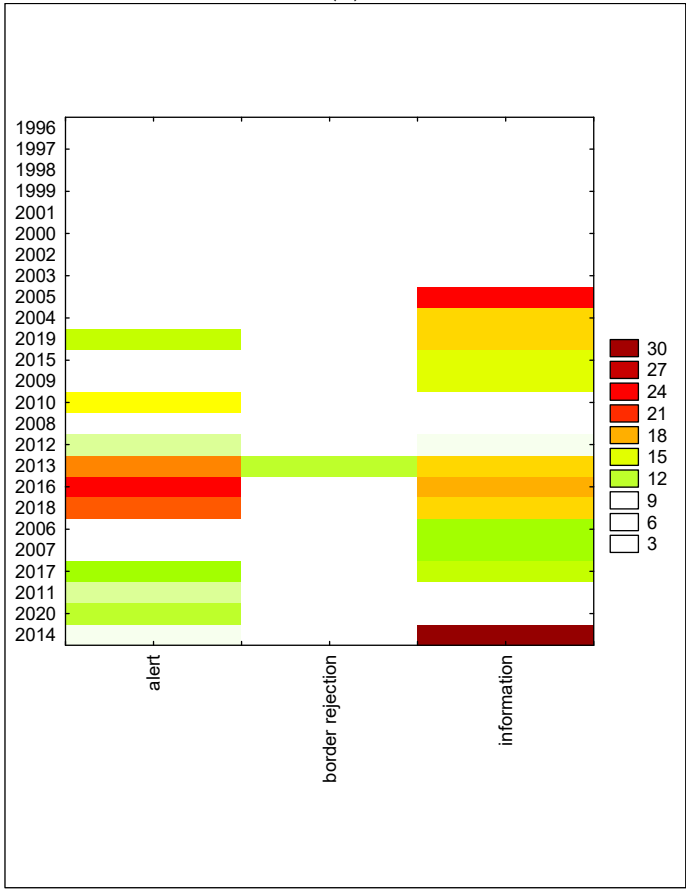

(d)

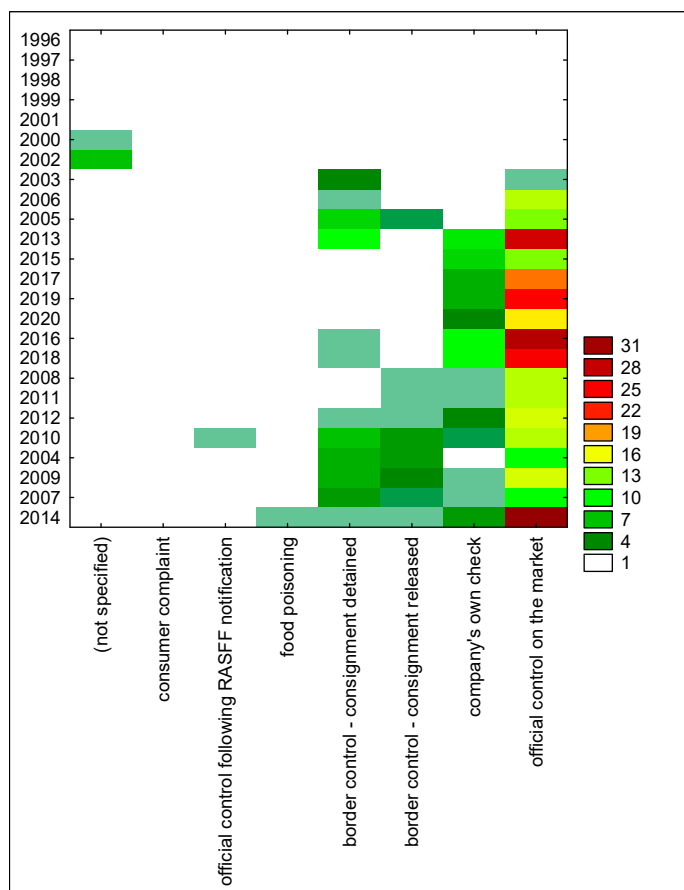

(e)

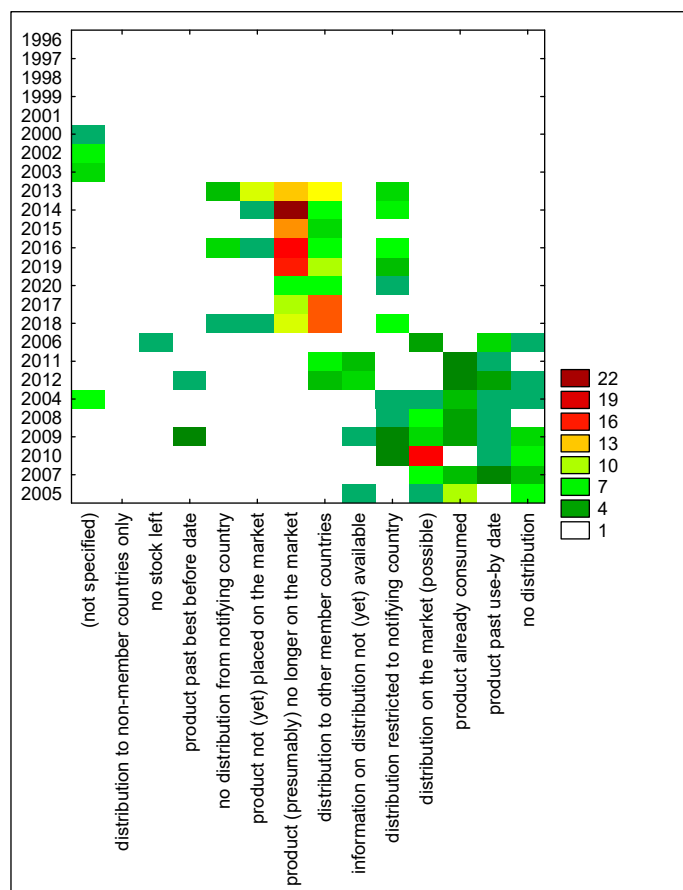

(f)

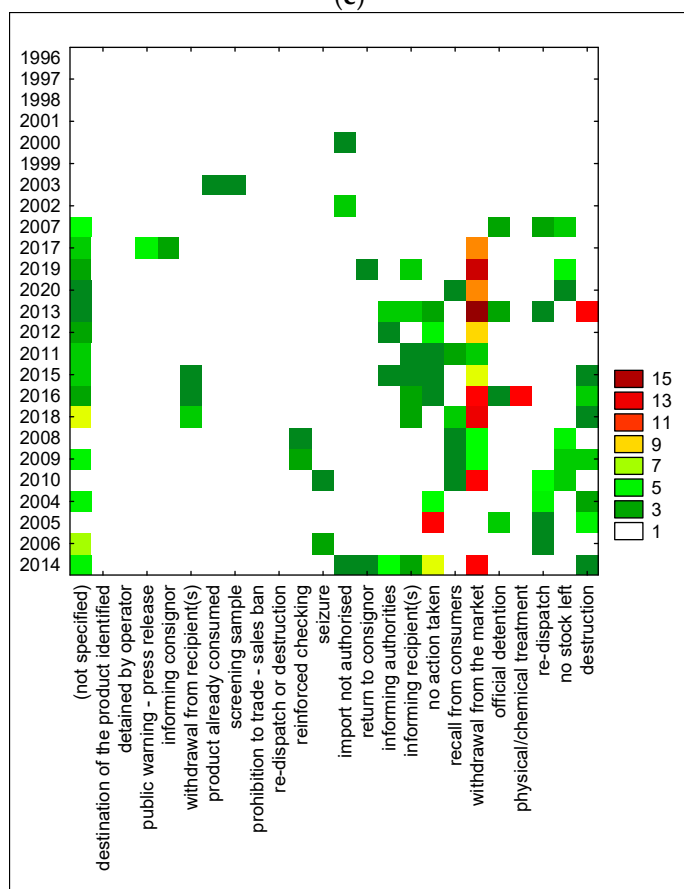

(g)

**Figure S4.** Results of two-way joining cluster analysis related to *Escherichia coli*; (a) product; (b) notifying country; (c) country of origin; (d) notification type; (e) notification basis; (f) distribution status; (g) action taken.



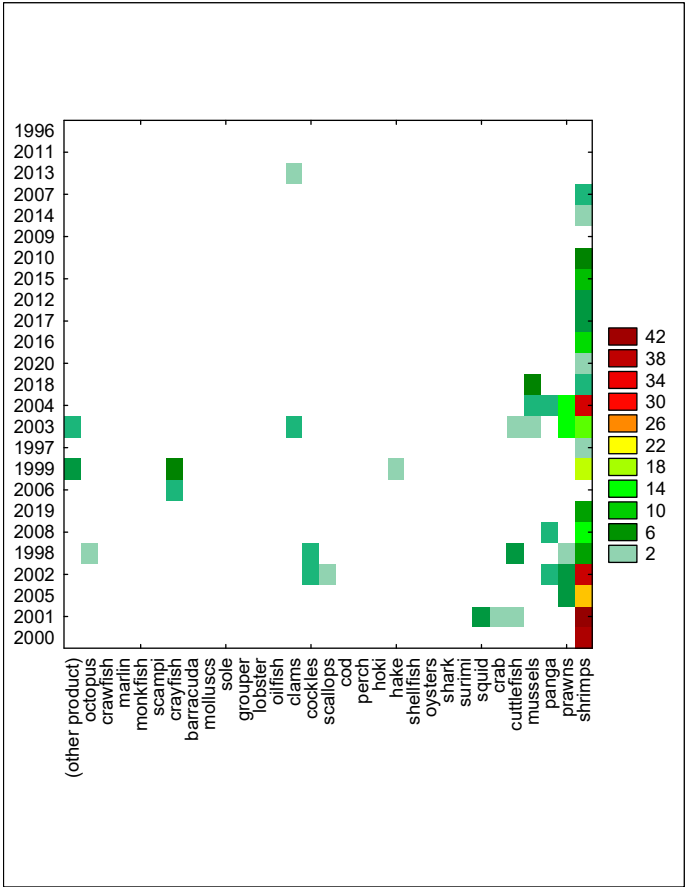

(a)

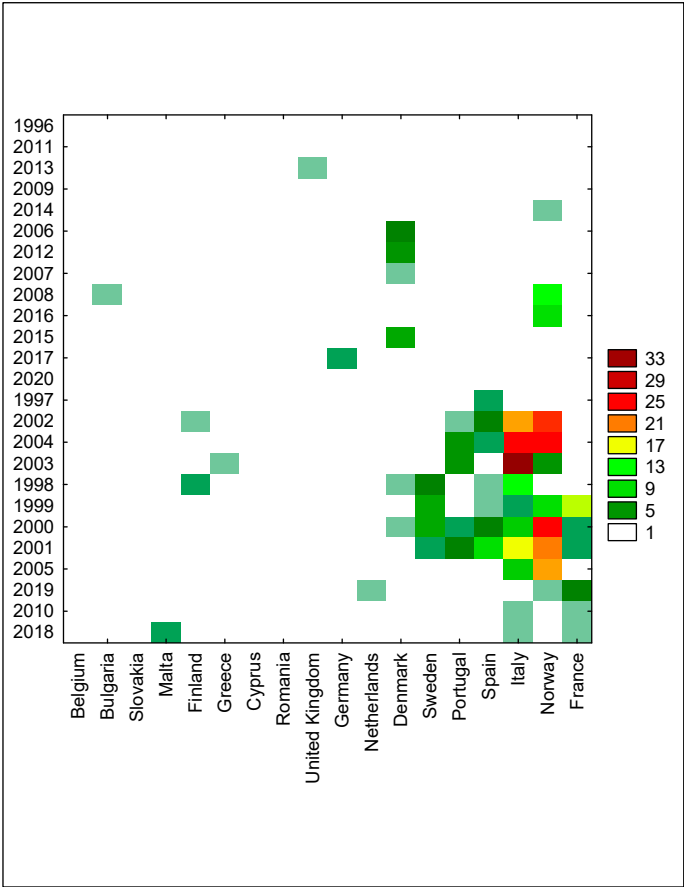

(b)

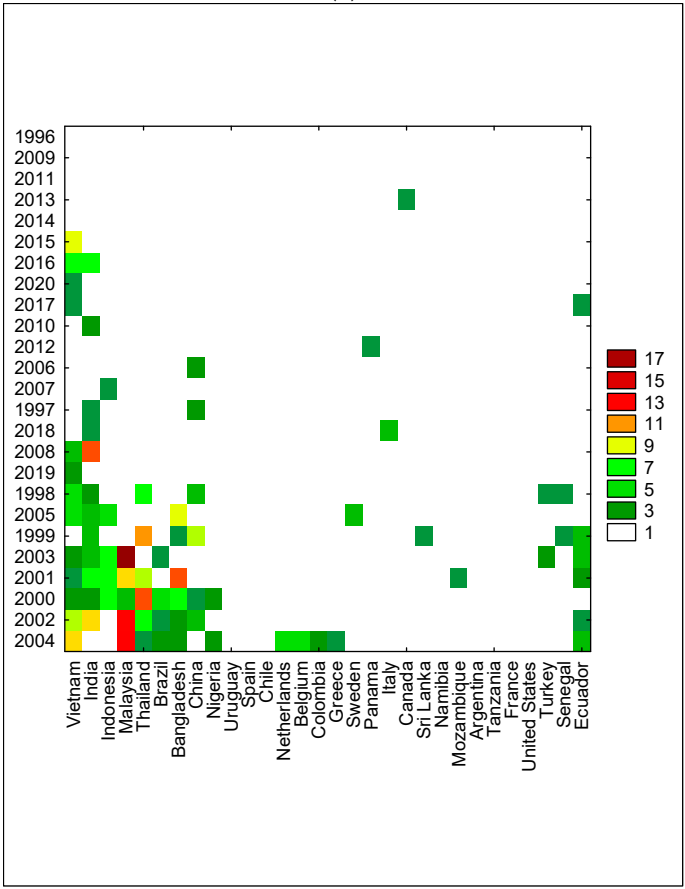

(c)

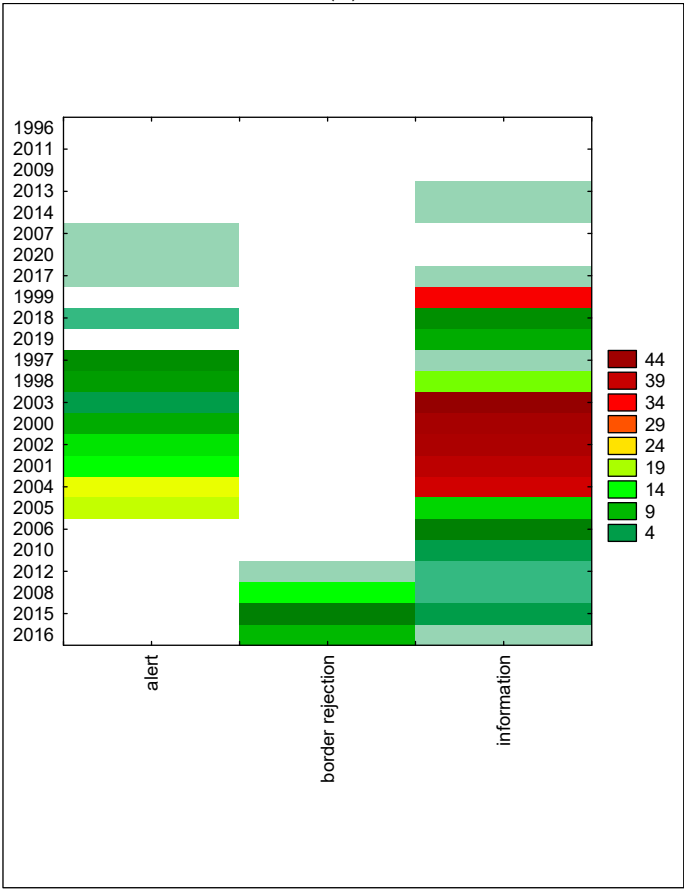

(d)

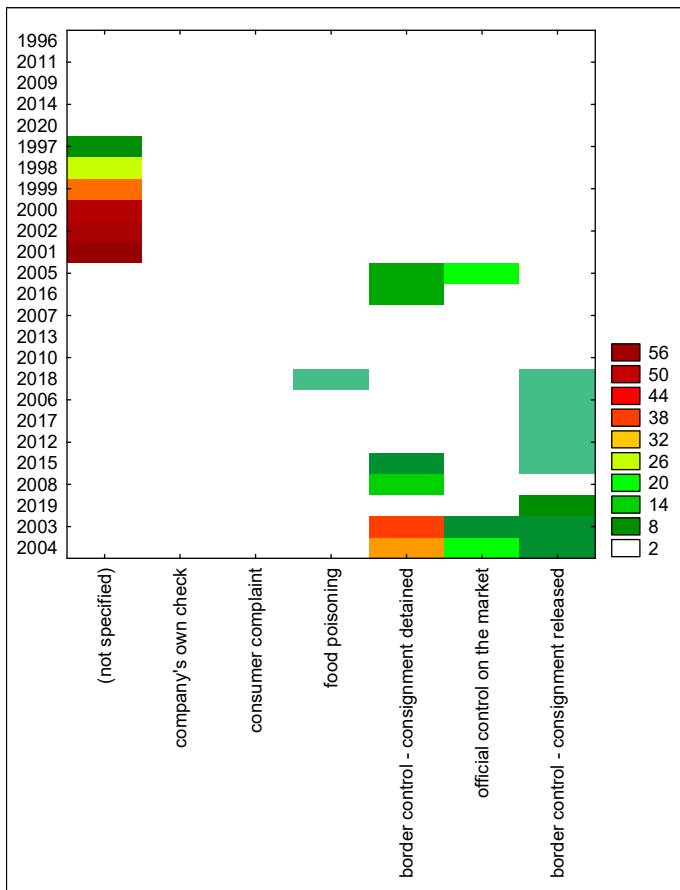

(e)

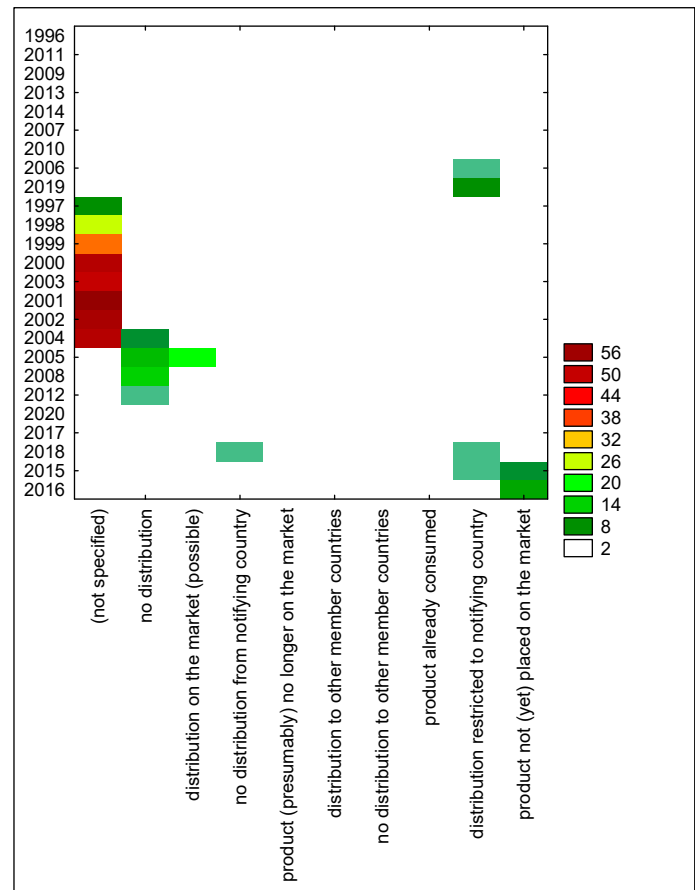

(f)

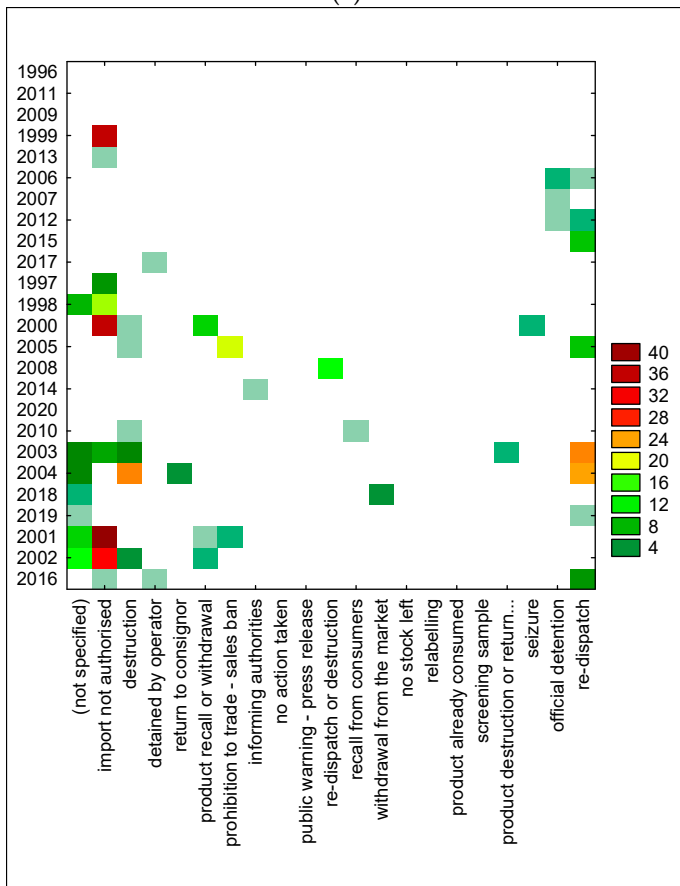

(g)

**Figure S5.** Results of two-way joining cluster analysis related to *Vibrio*; (a) product; (b) notifying country; (c) country of origin; (d) notification type; (e) notification basis; (f) distribution status; (g) action taken.

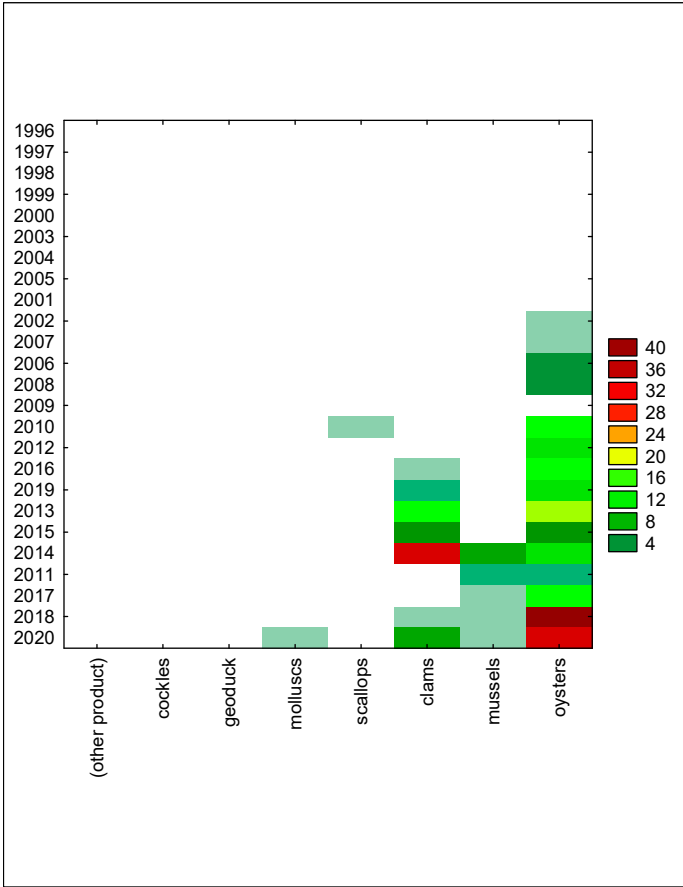

(a)

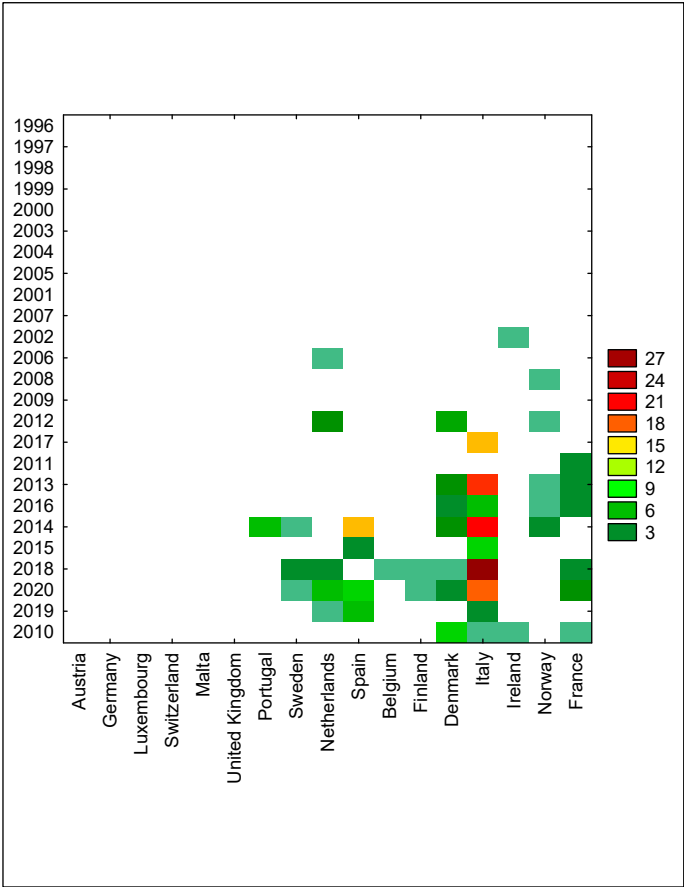

(b)

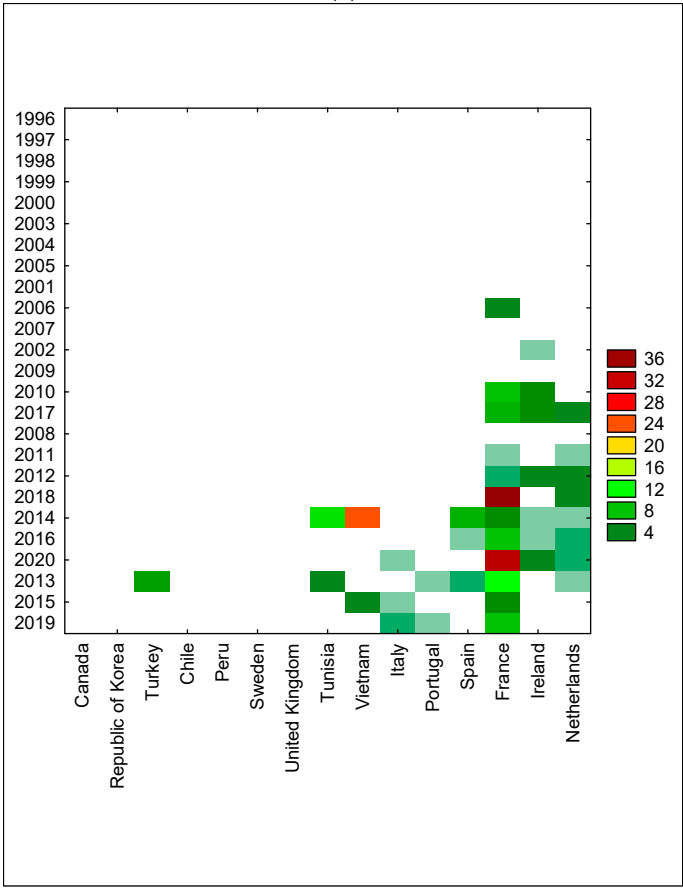

(c)

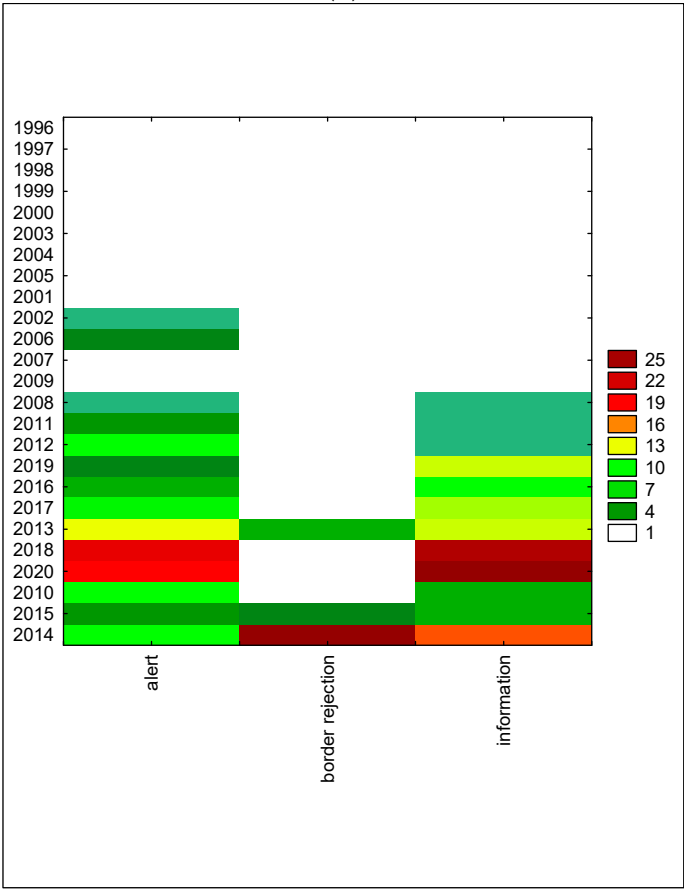

(d)

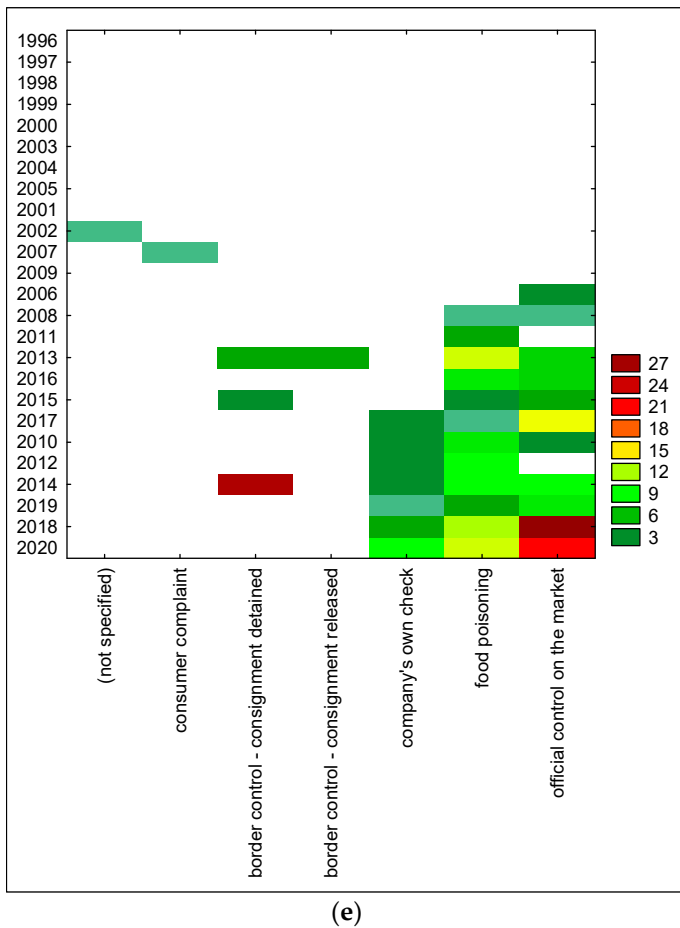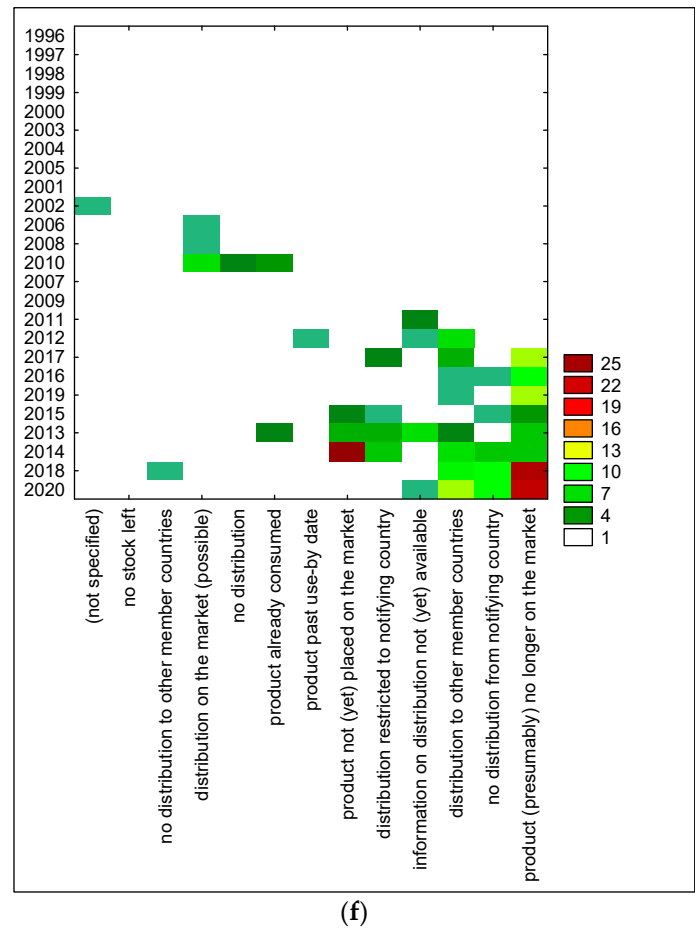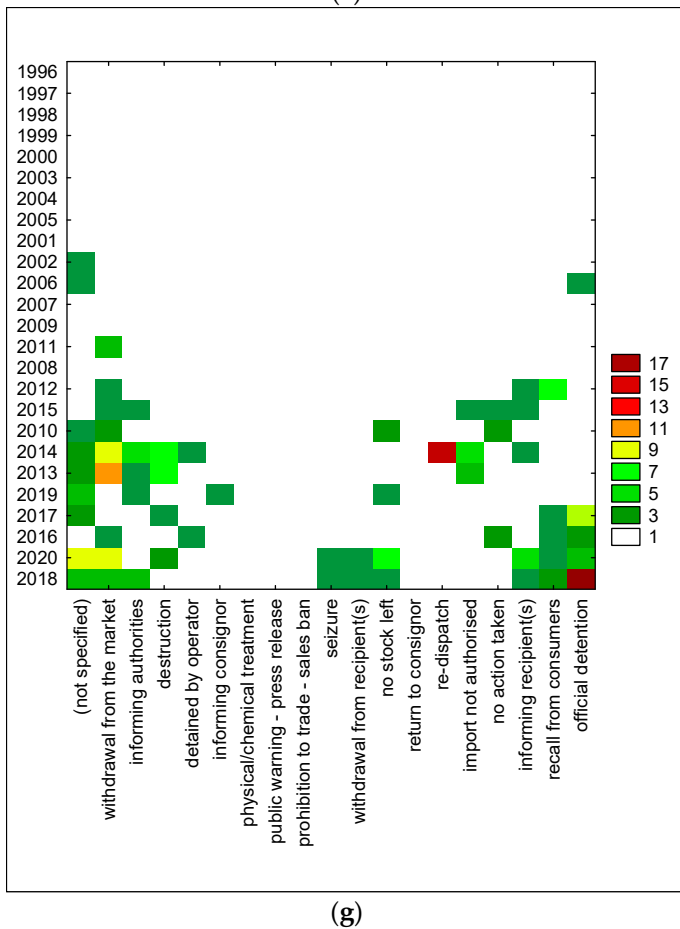

**Figure S6.** Results of two-way joining cluster analysis related to norovirus; (a) product; (b) notifying country; (c) country of origin; (d) notification type; (e) notification basis; (f) distribution status; (g) action taken.

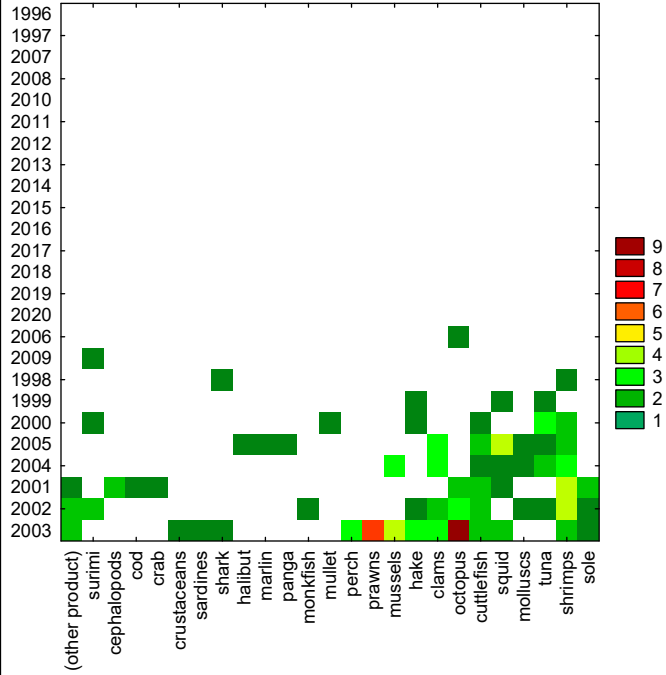

(a)

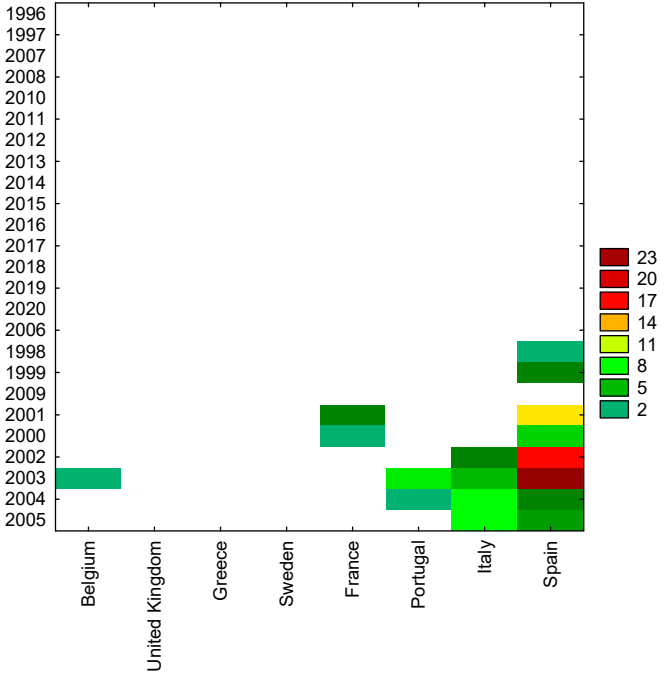

(b)

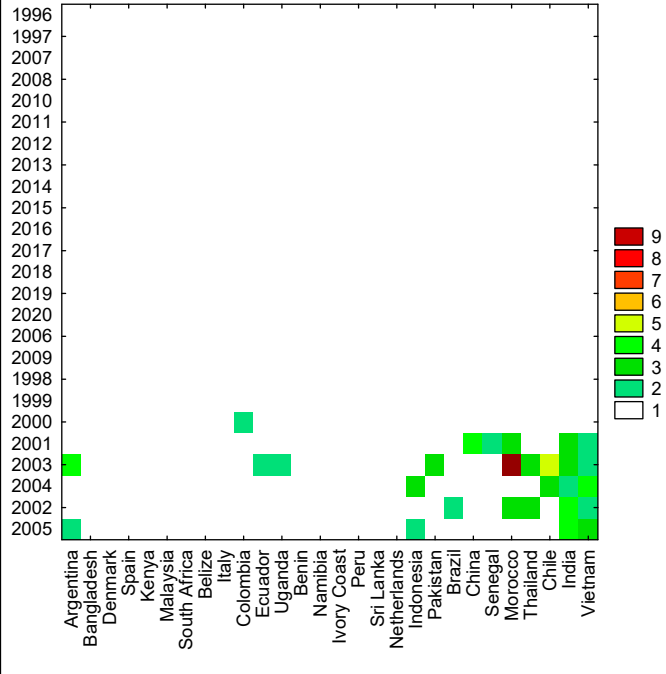

(c)

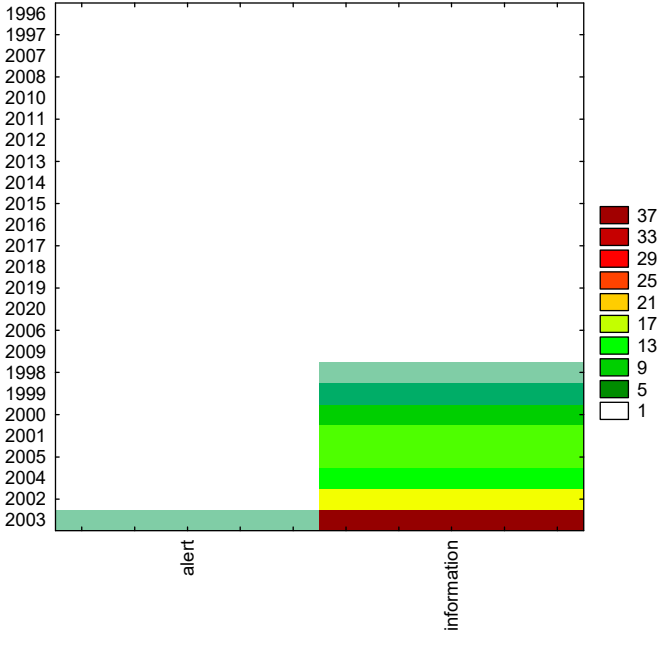

(d)

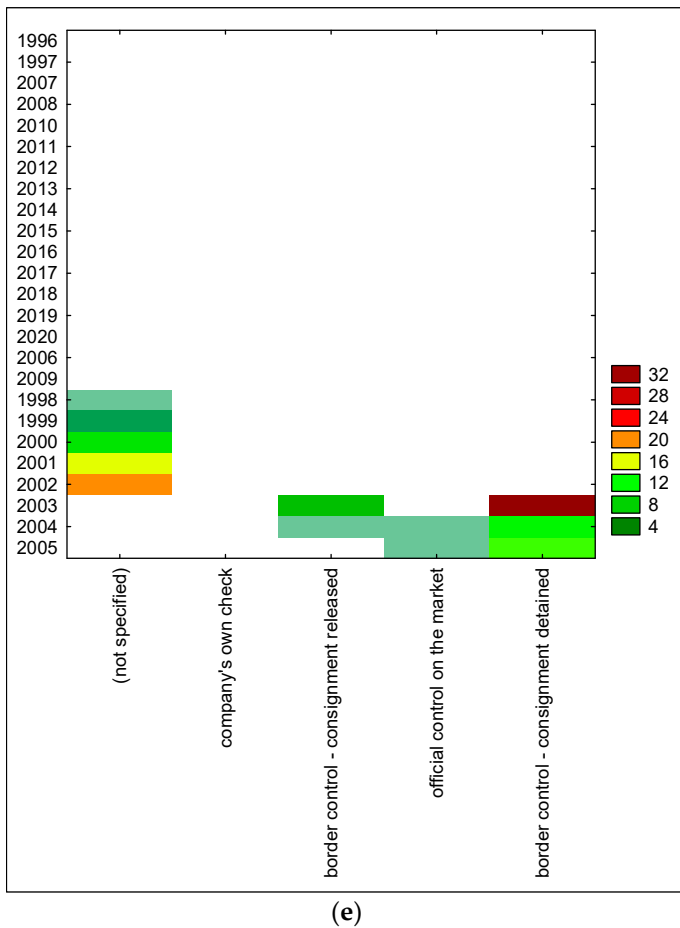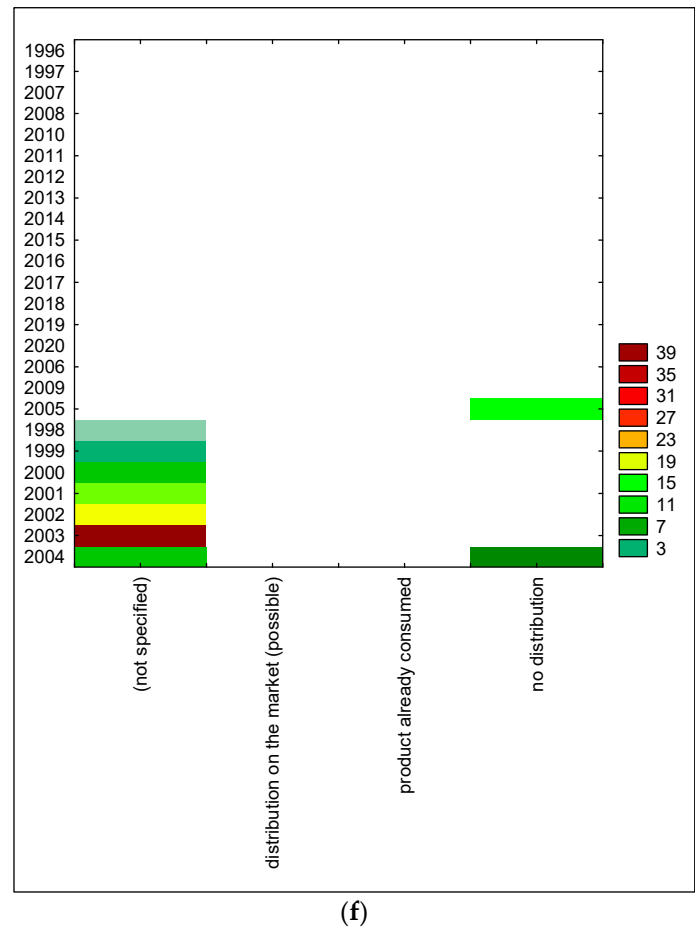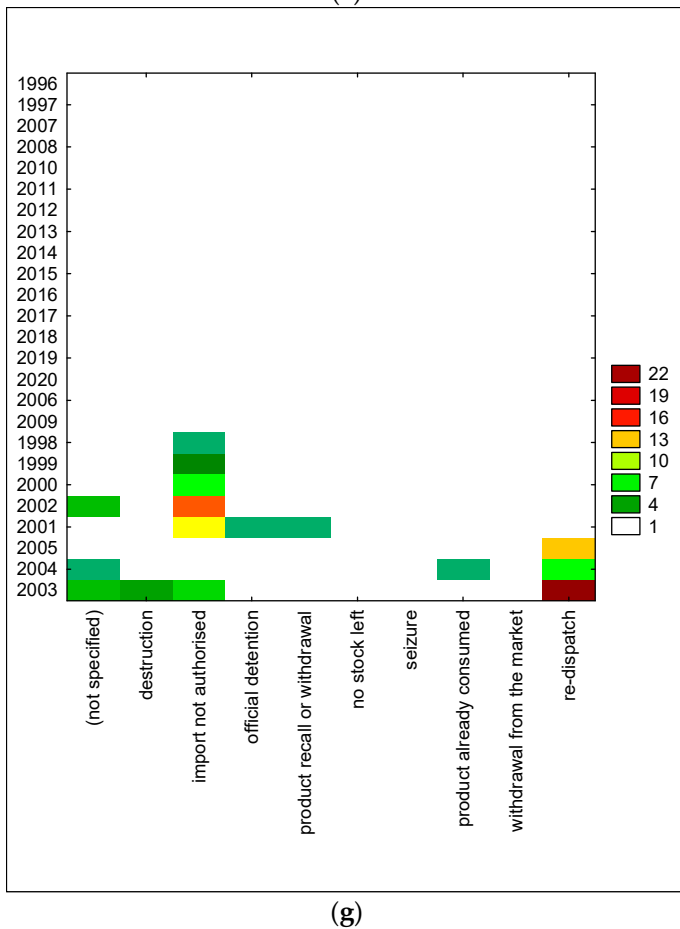

**Figure S7.** Results of two-way joining cluster analysis related to mesophiles; (a) product; (b) notifying country; (c) country of origin; (d) notification type; (e) notification basis; (f) distribution status; (g) action taken.

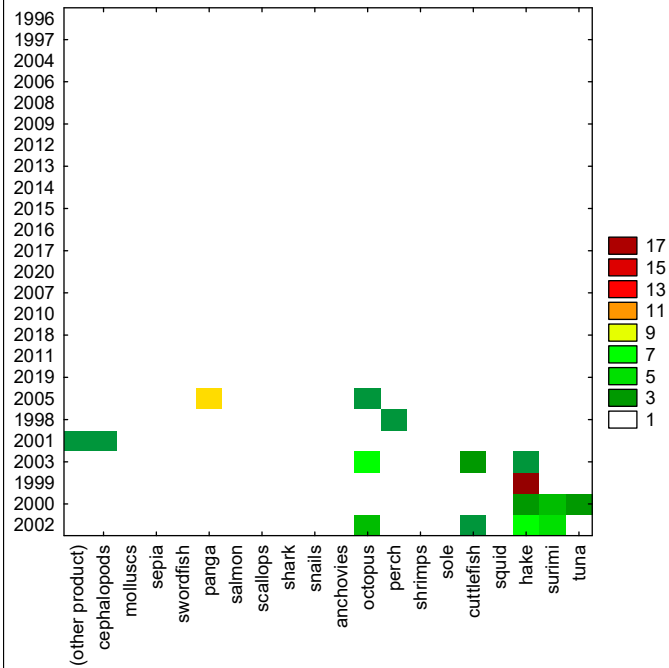

(a)

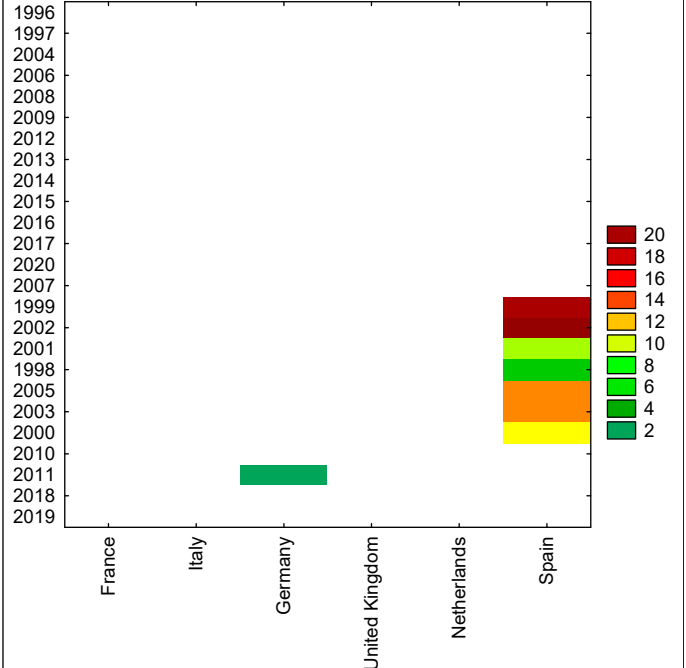

(b)

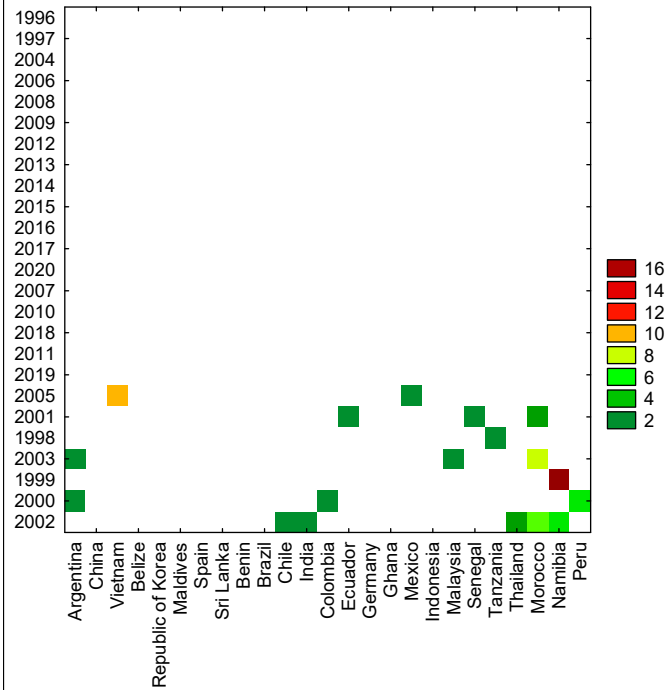

(c)

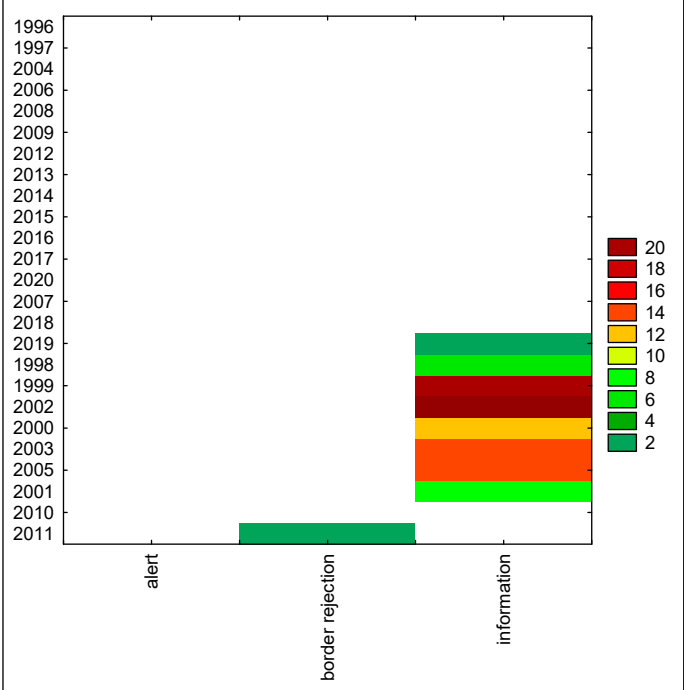

(d)

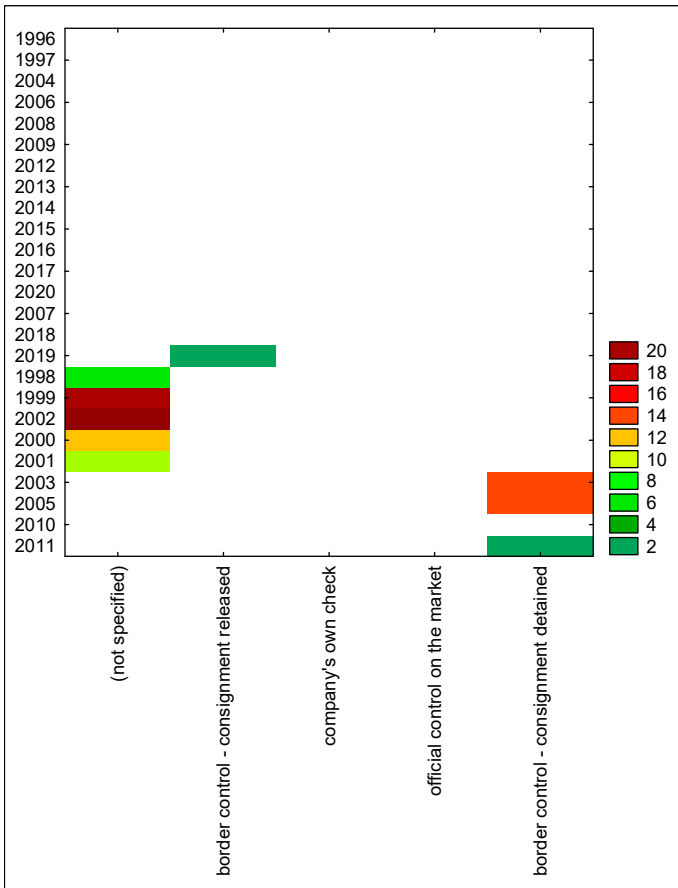

(e)

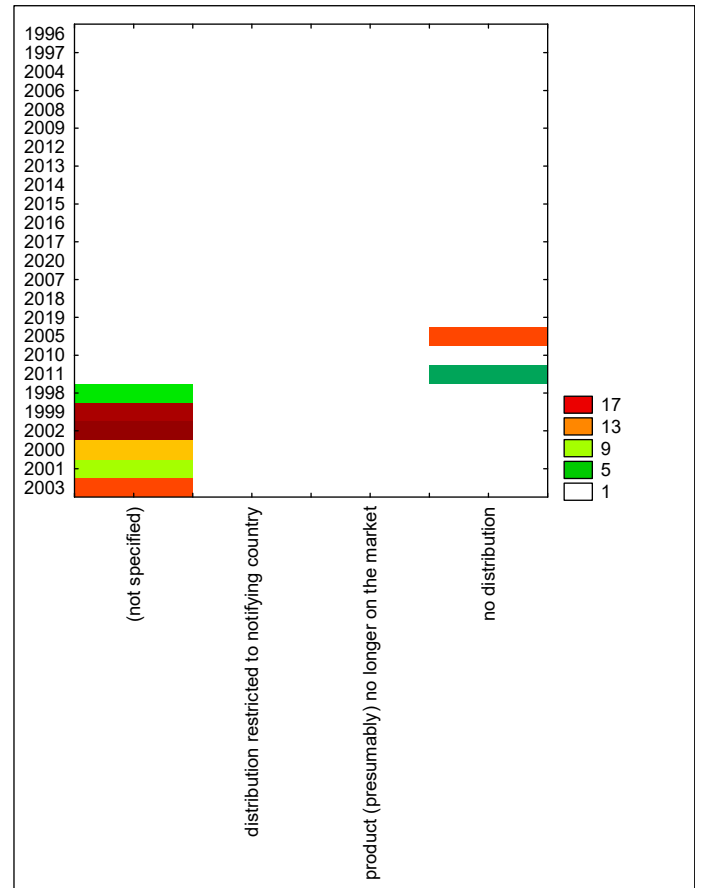

(f)

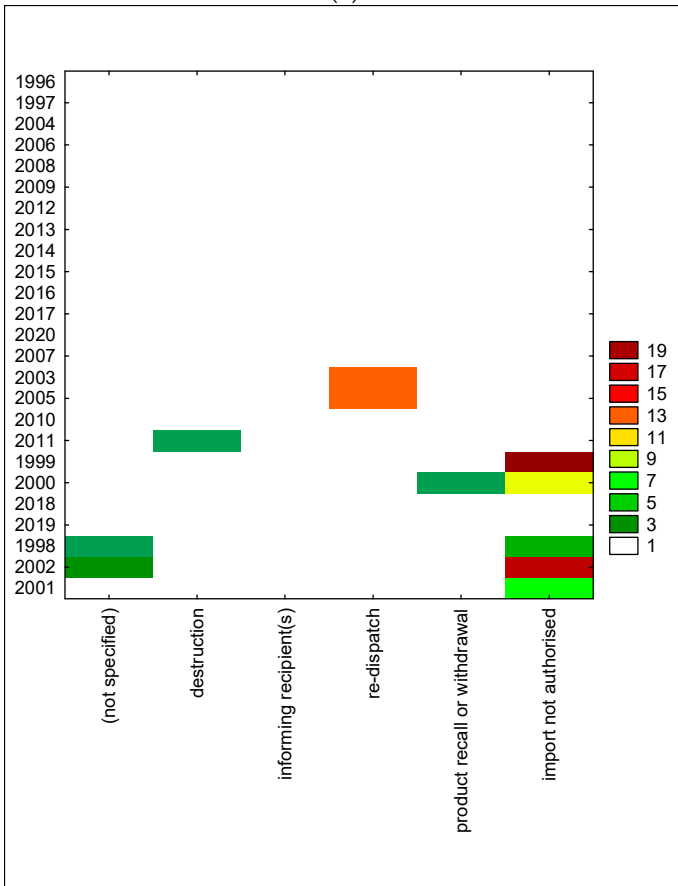

(g)

**Figure S8.** Results of two-way joining cluster analysis related to Enterobacteriaceae; (a) product; (b) notifying country; (c) country of origin; (d) notification type; (e) notification basis; (f) distribution status; (g) action taken.



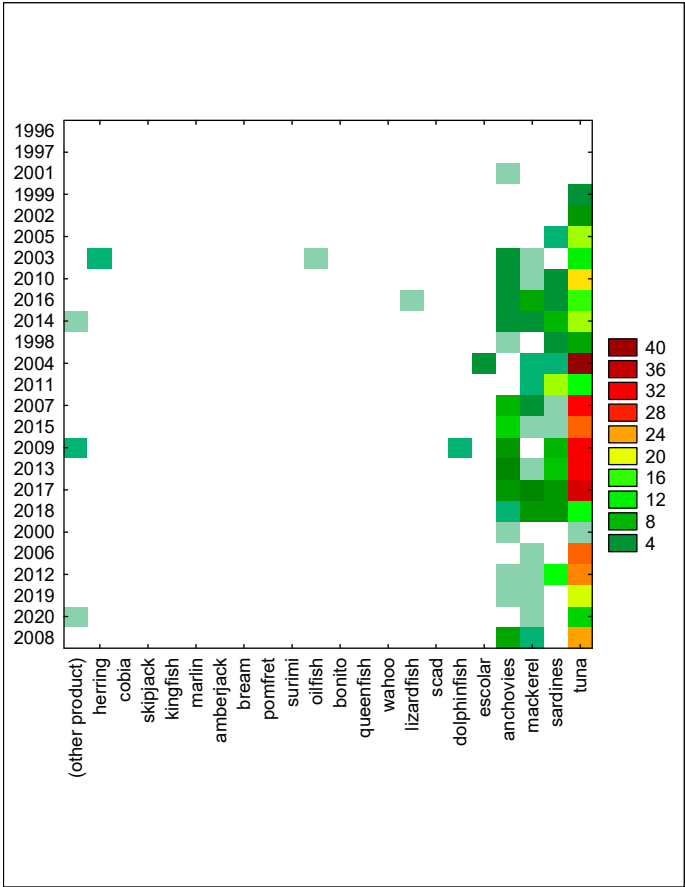

(a)

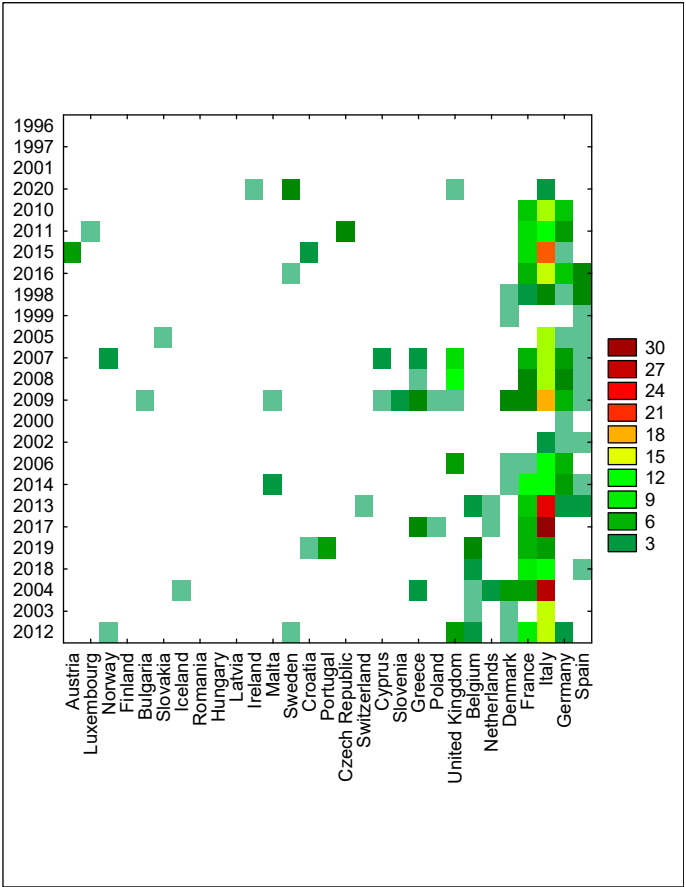

(b)

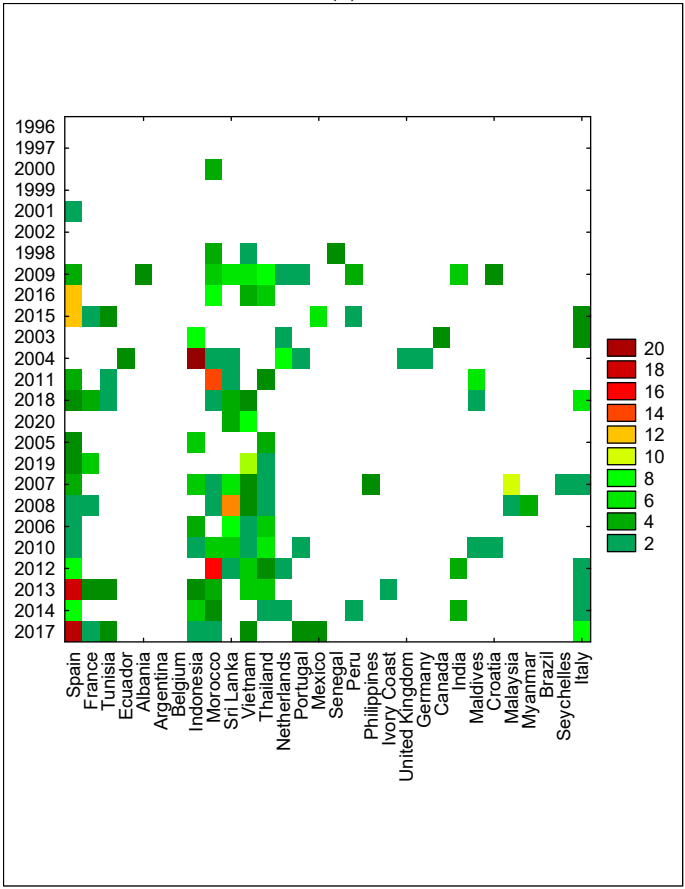

(c)

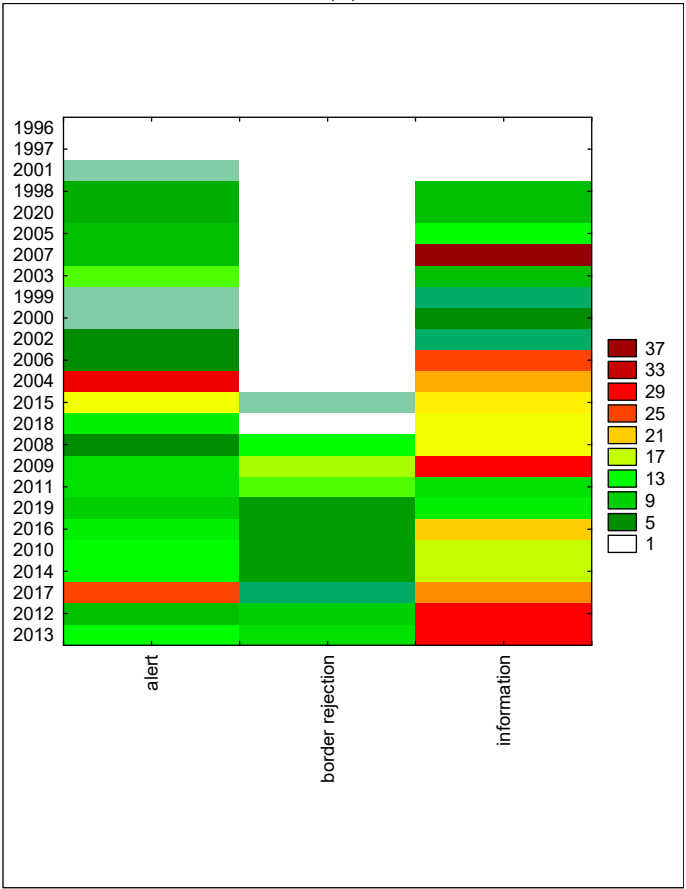

(d)

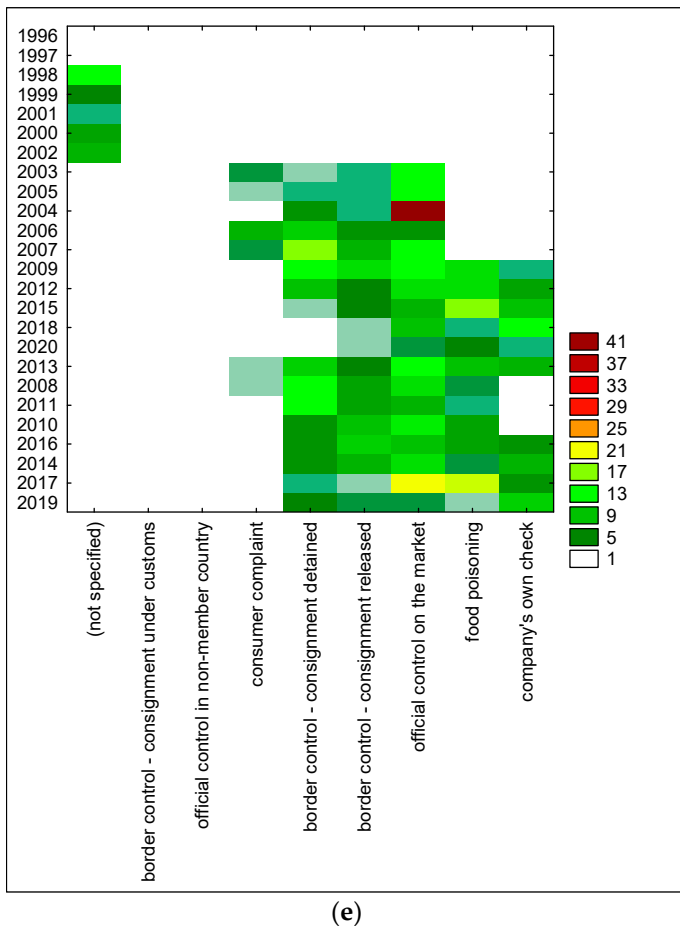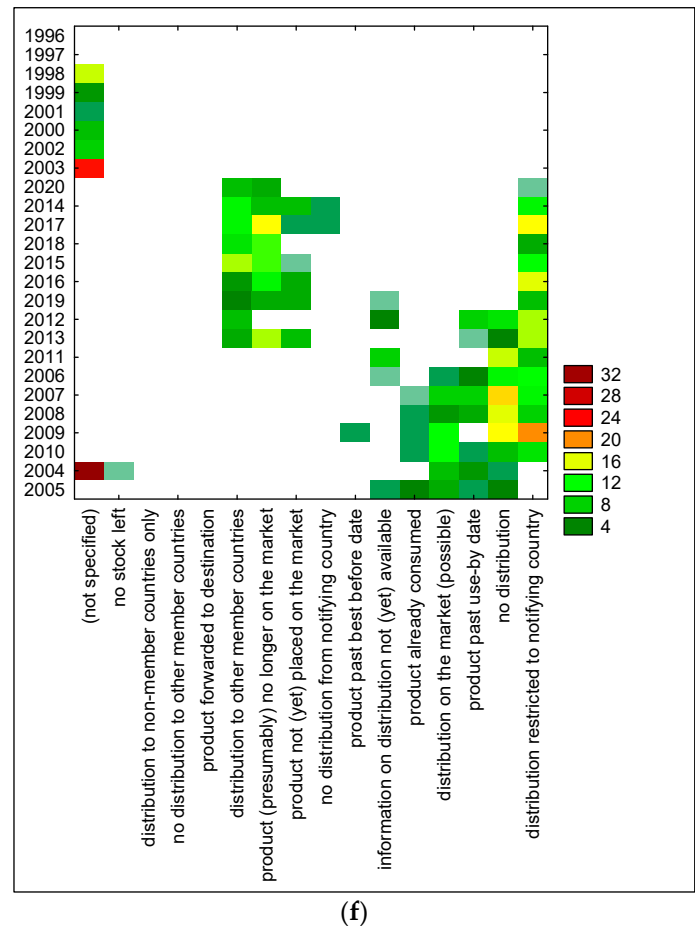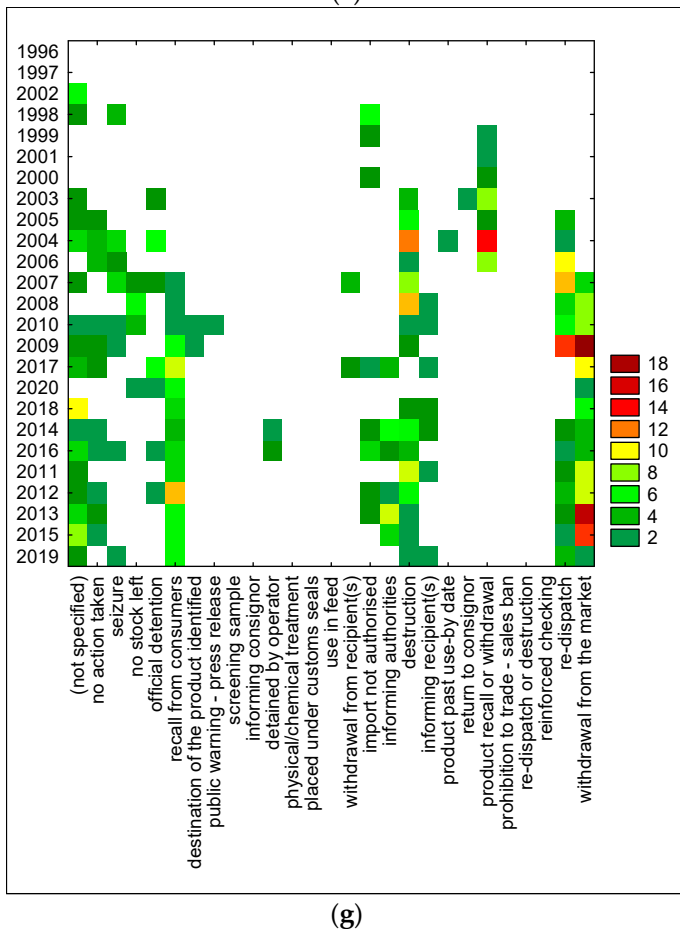

**Figure S9.** Results of two-way joining cluster analysis related to histamine; (a) product; (b) notifying country; (c) country of origin; (d) notification type; (e) notification basis; (f) distribution status; (g) action taken.

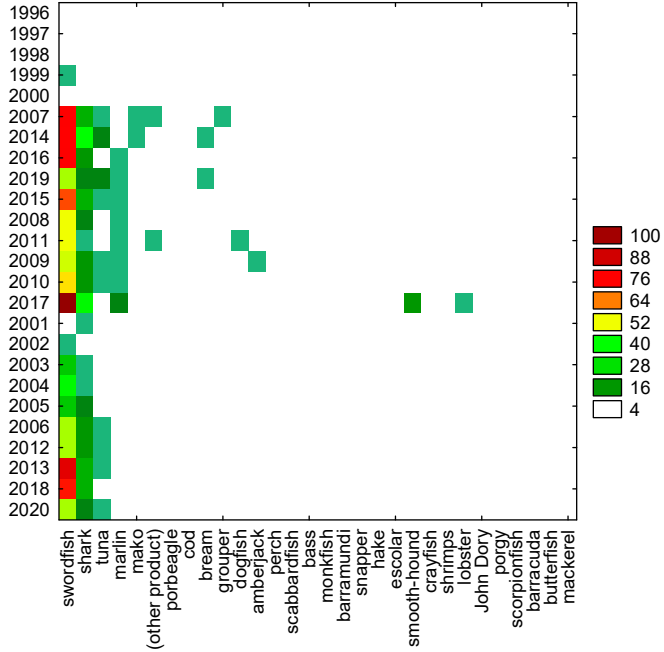

(a)

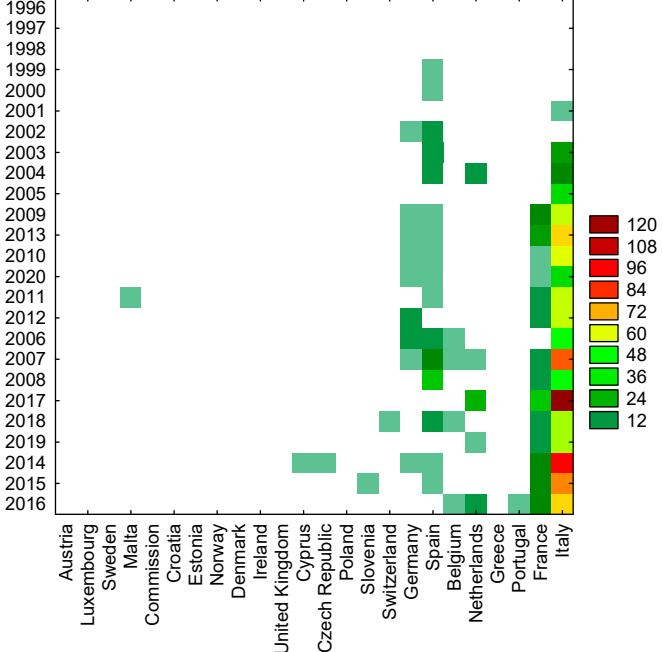

(b)

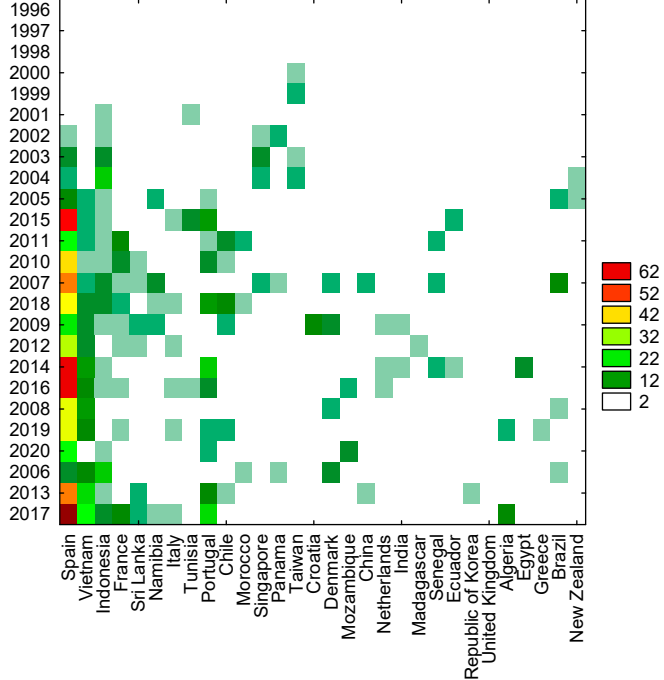

(c)

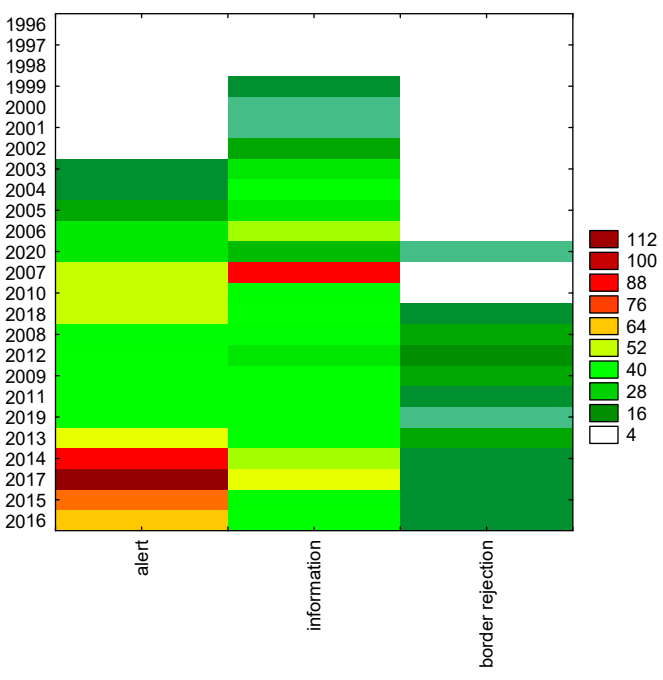

(d)

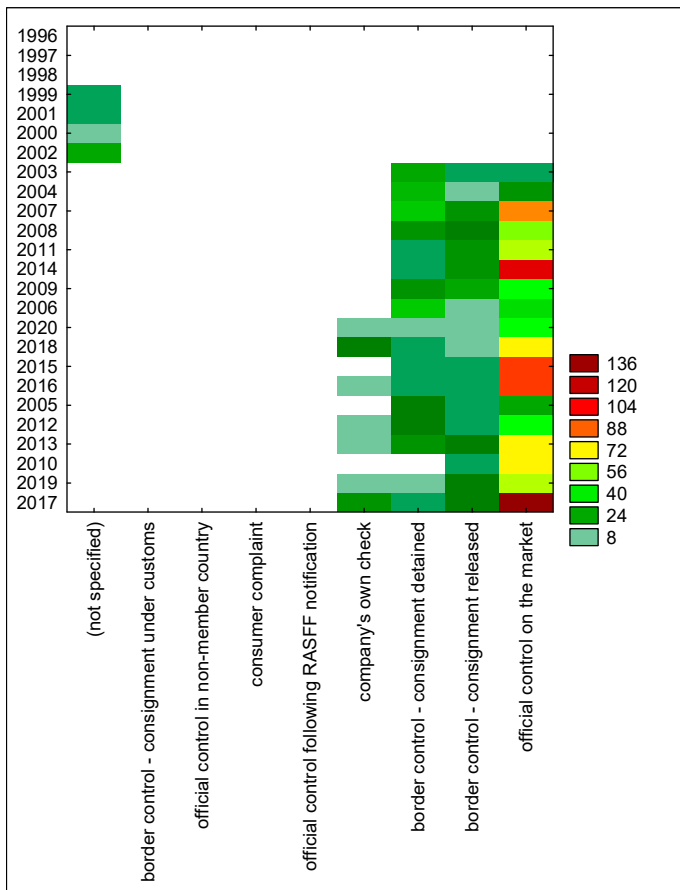

(e)

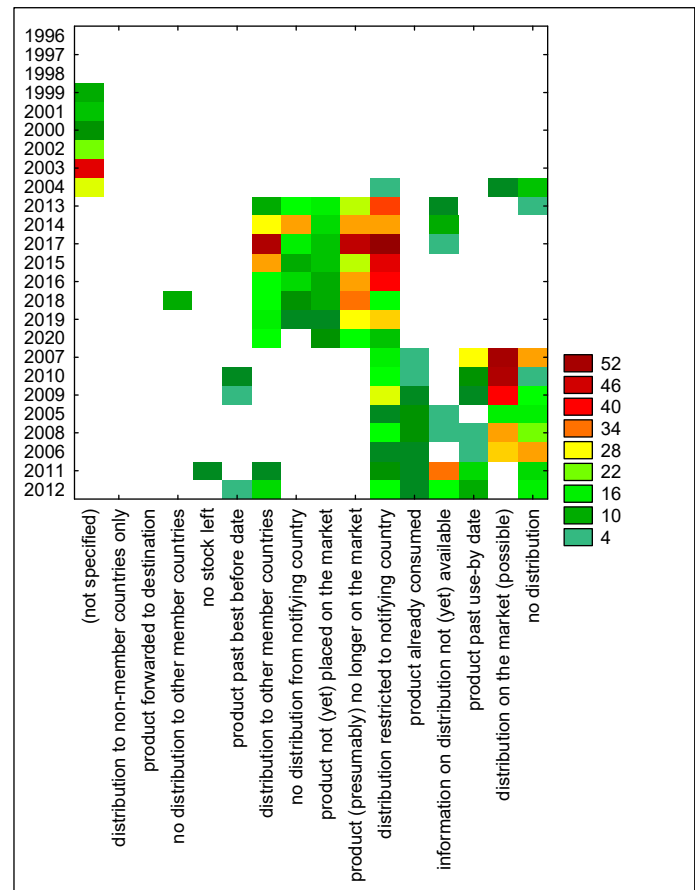

(f)

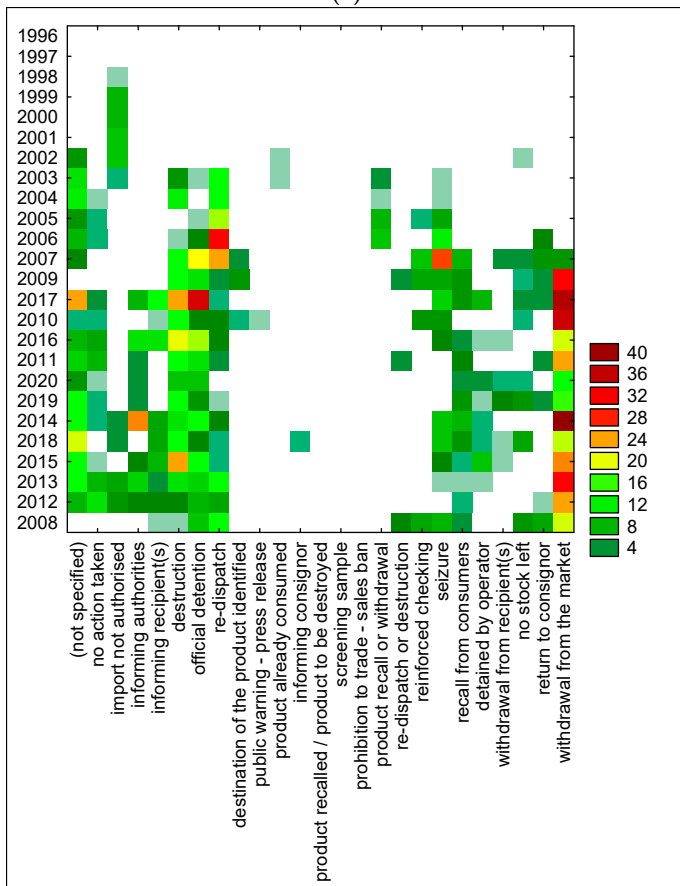

(g)

**Figure S10.** Results of two-way joining cluster analysis related to mercury; (a) product; (b) notifying country; (c) country of origin; (d) notification type; (e) notification basis; (f) distribution status; (g) action taken.

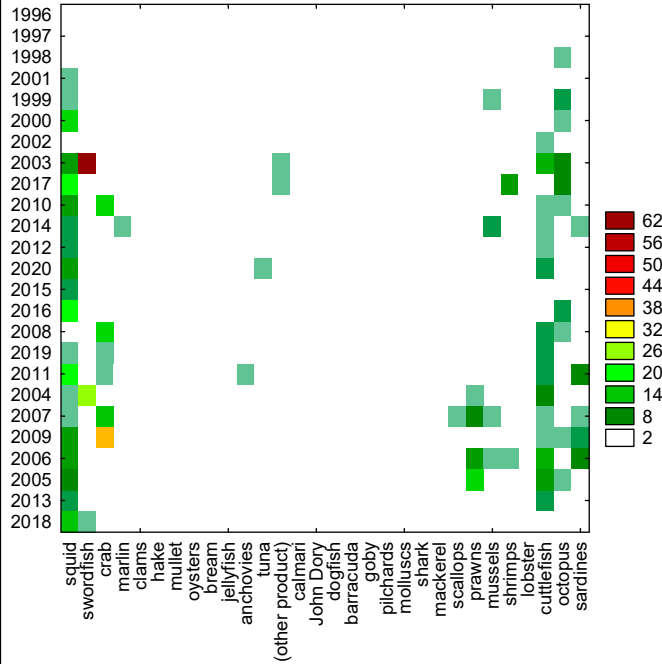

(a)

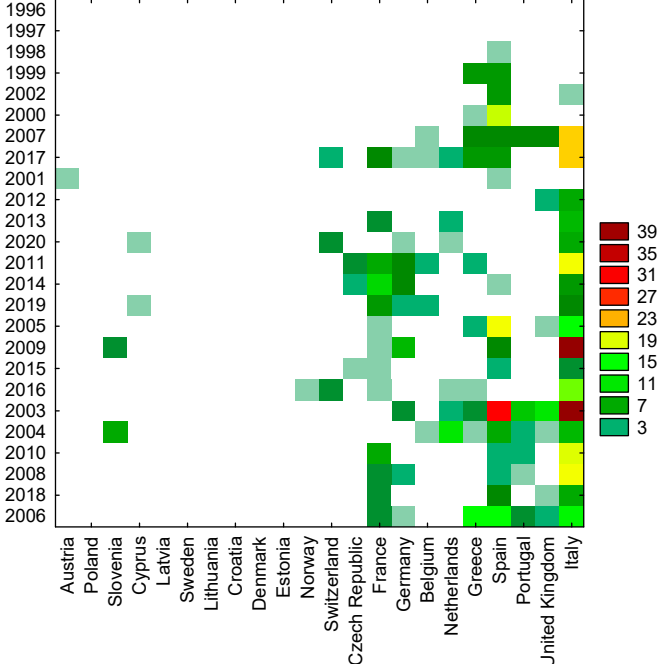

(b)

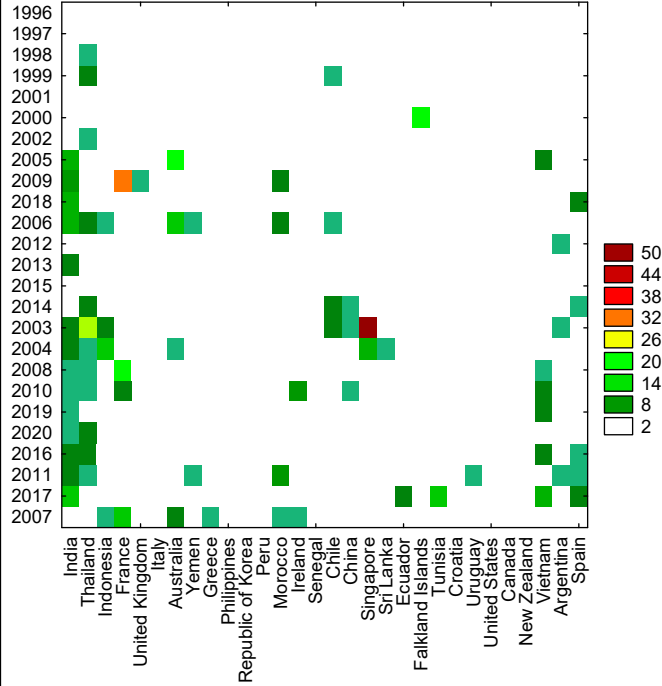

(c)

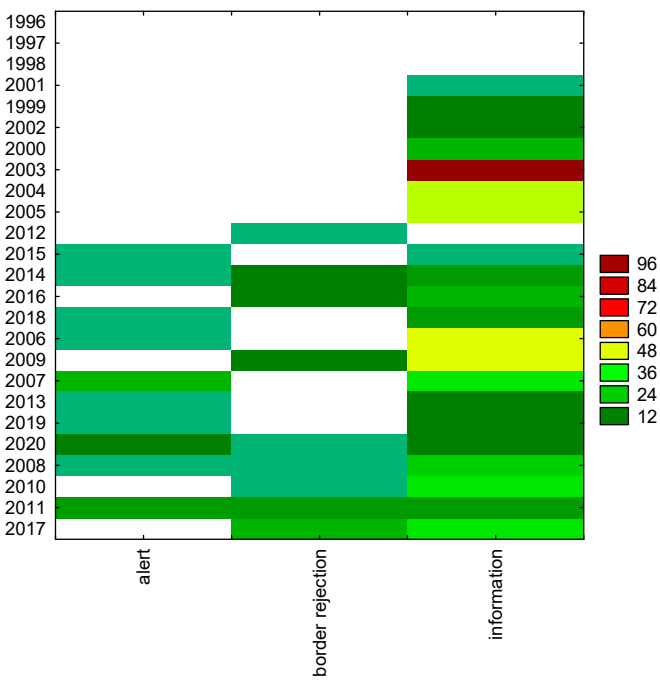

(d)

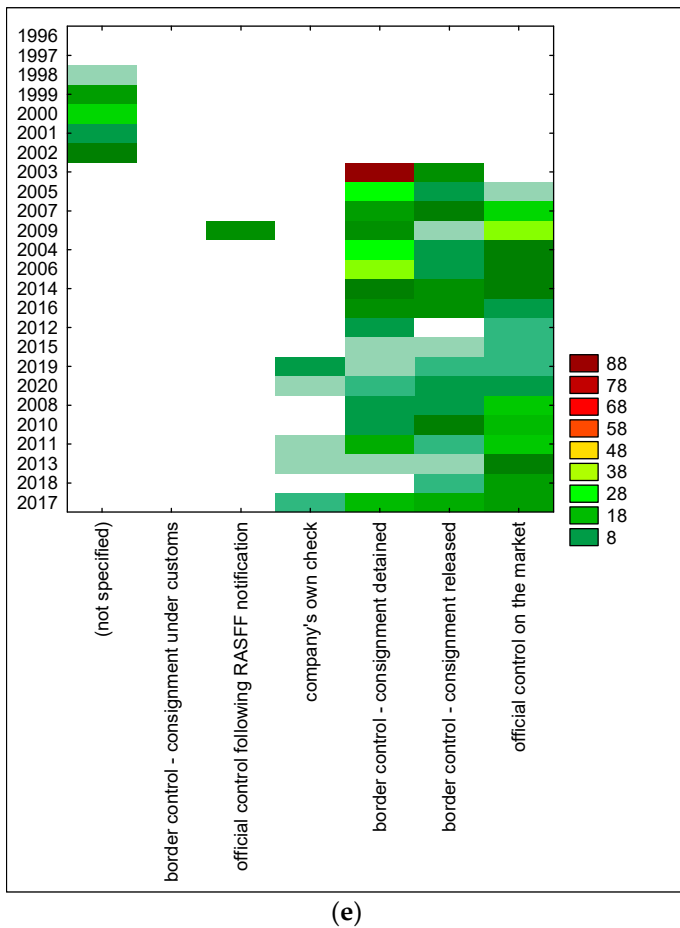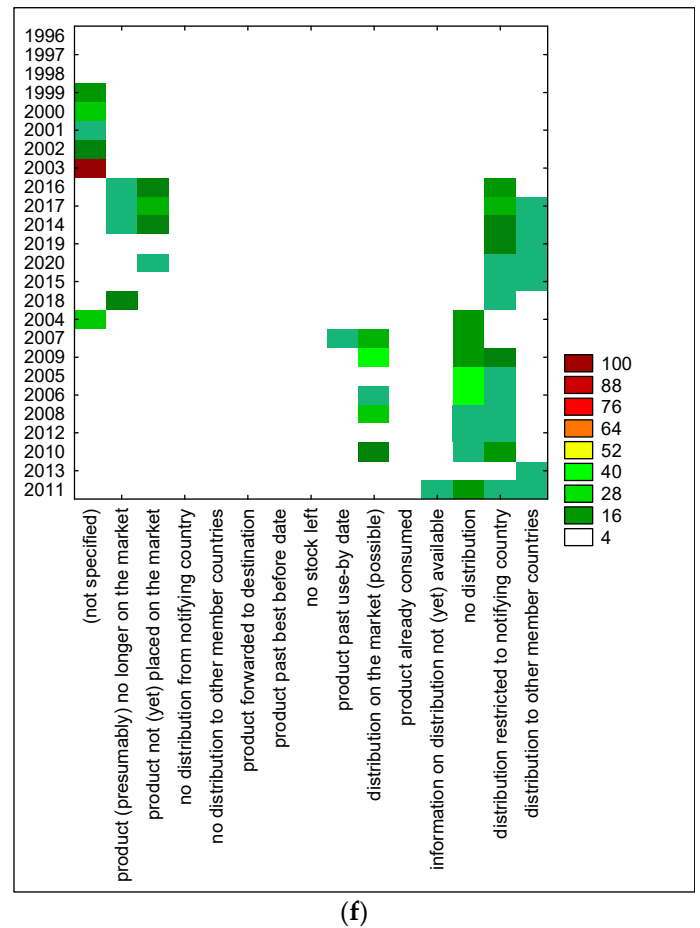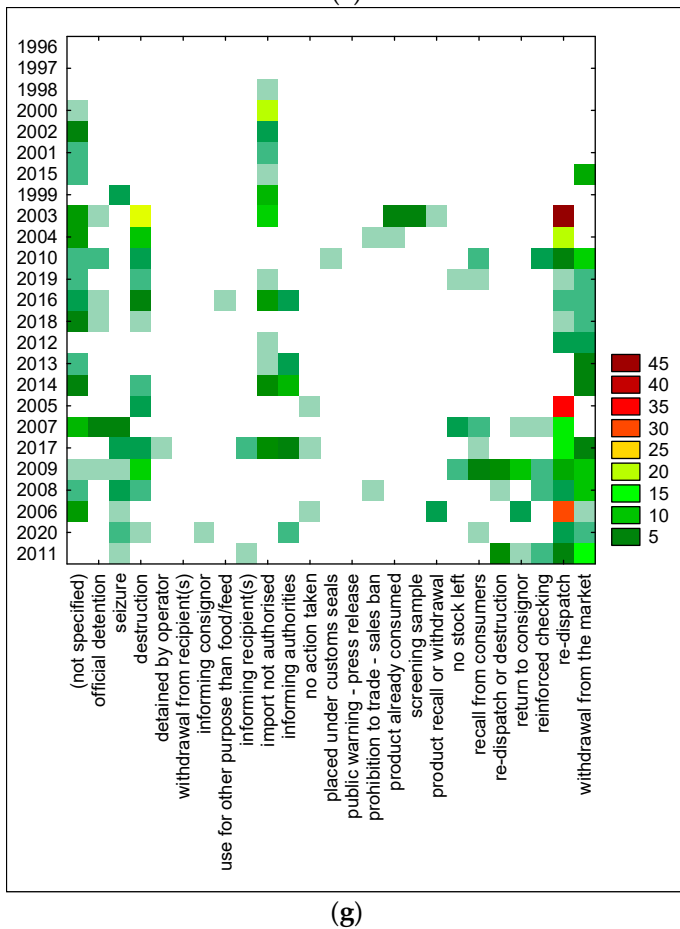

**Figure S11.** Results of two-way joining cluster analysis related to cadmium; (a) product; (b) notifying country; (c) country of origin; (d) notification type; (e) notification basis; (f) distribution status; (g) action taken.

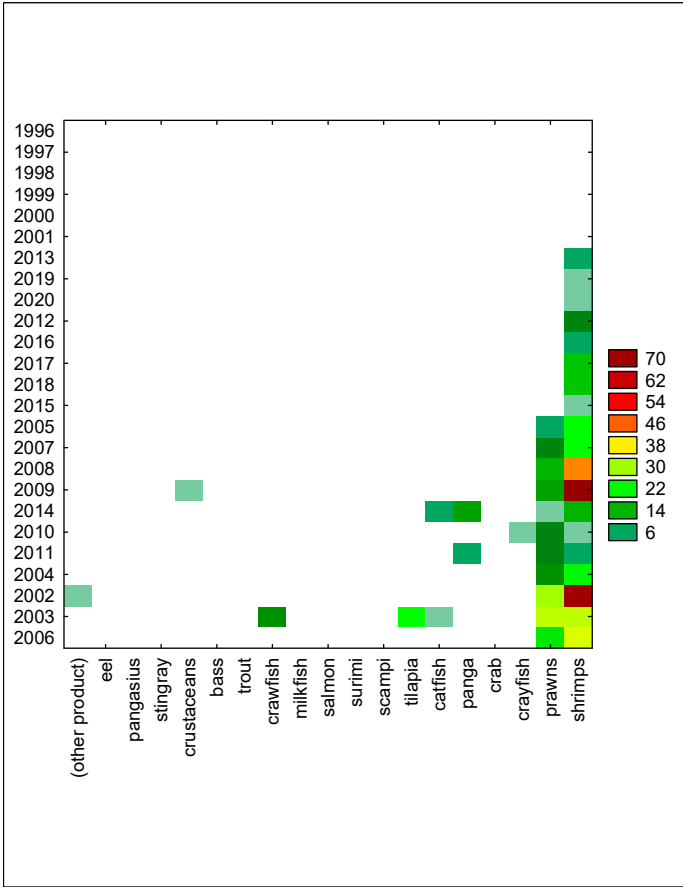

(a)

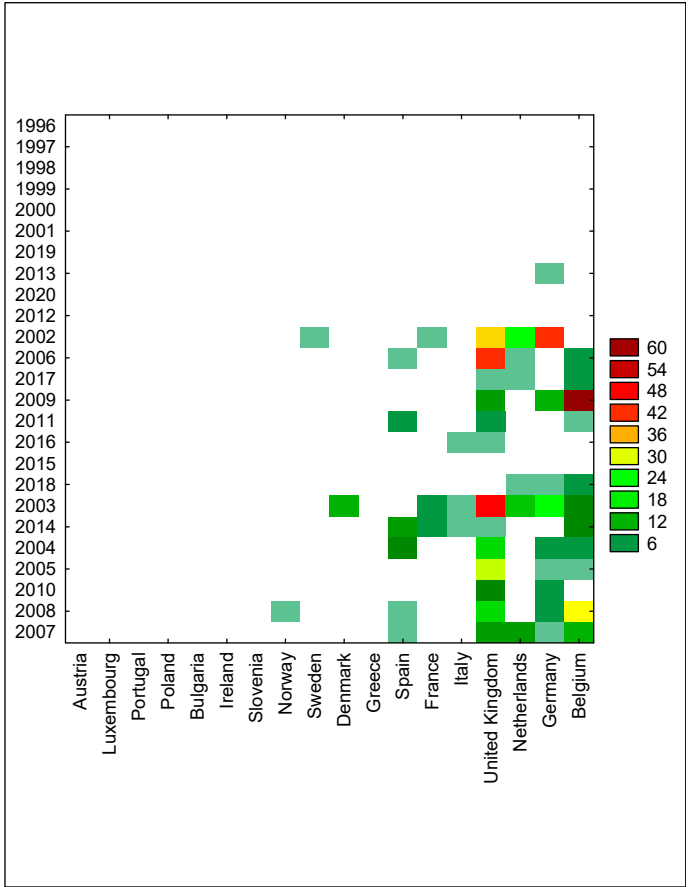

(b)

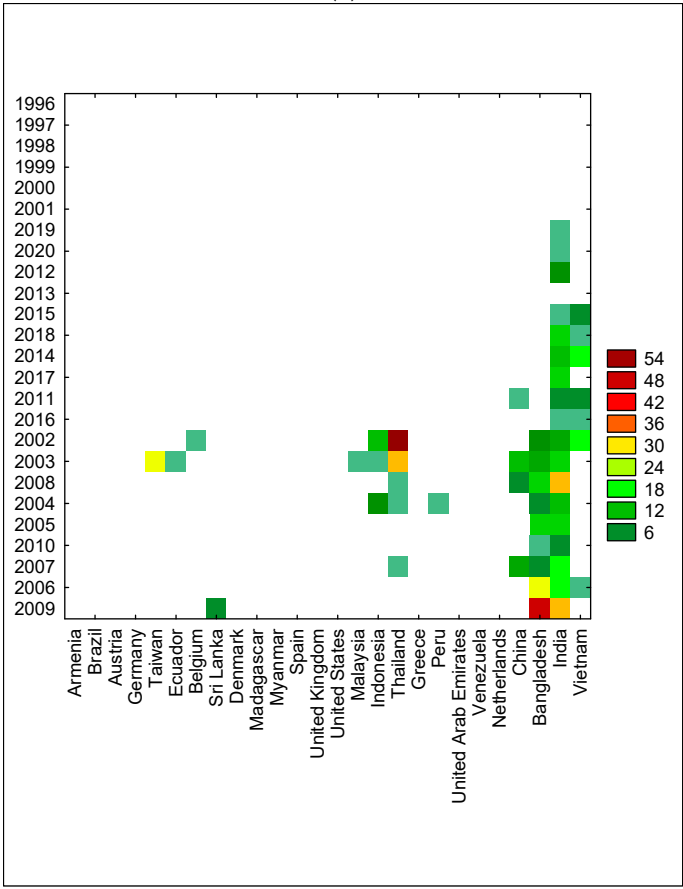

(c)

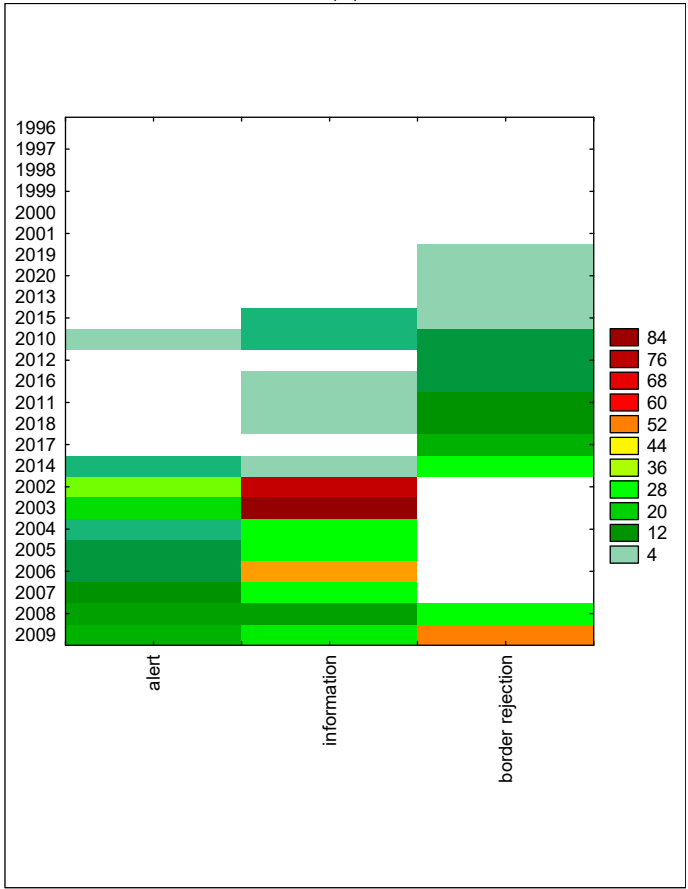

(d)

[illegible][illegible]

**Figure S12.** Results of two-way joining cluster analysis related to nitrofurantoin (metabolite); (a) product; (b) notifying country; (c) country of origin; (d) notification type; (e) notification basis; (f) distribution status; (g) action taken.



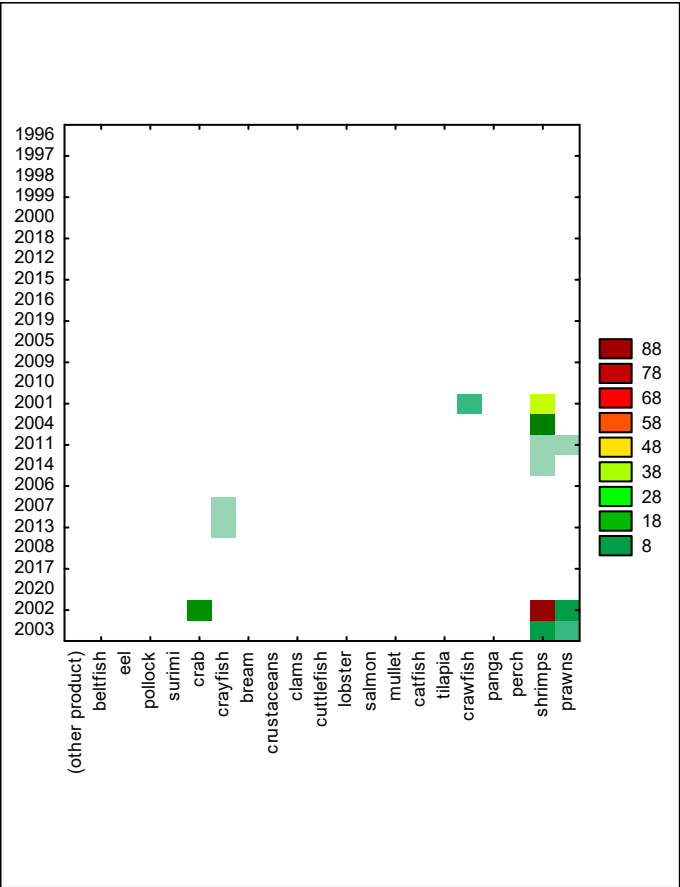

(a)

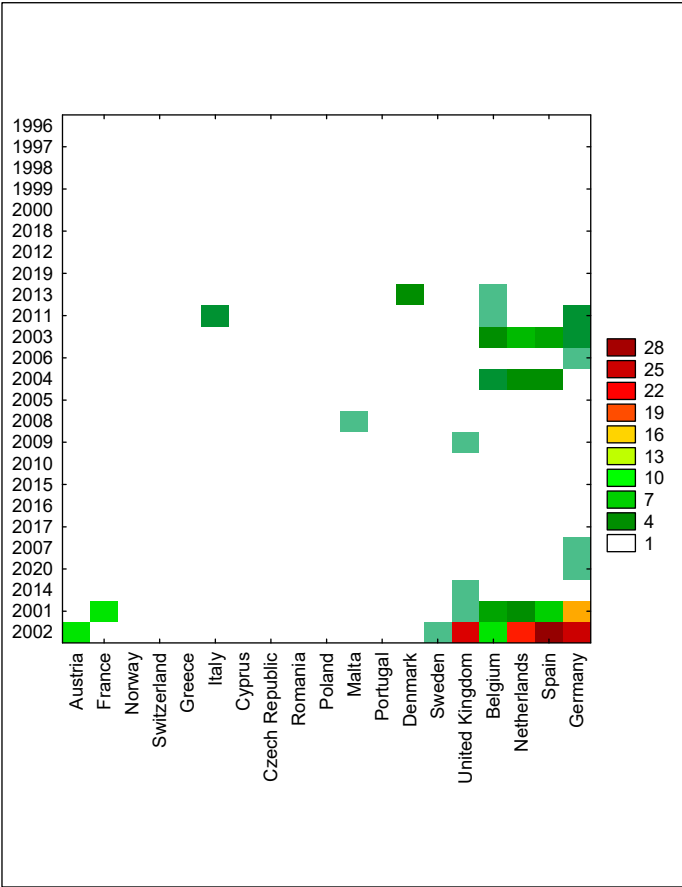

(b)

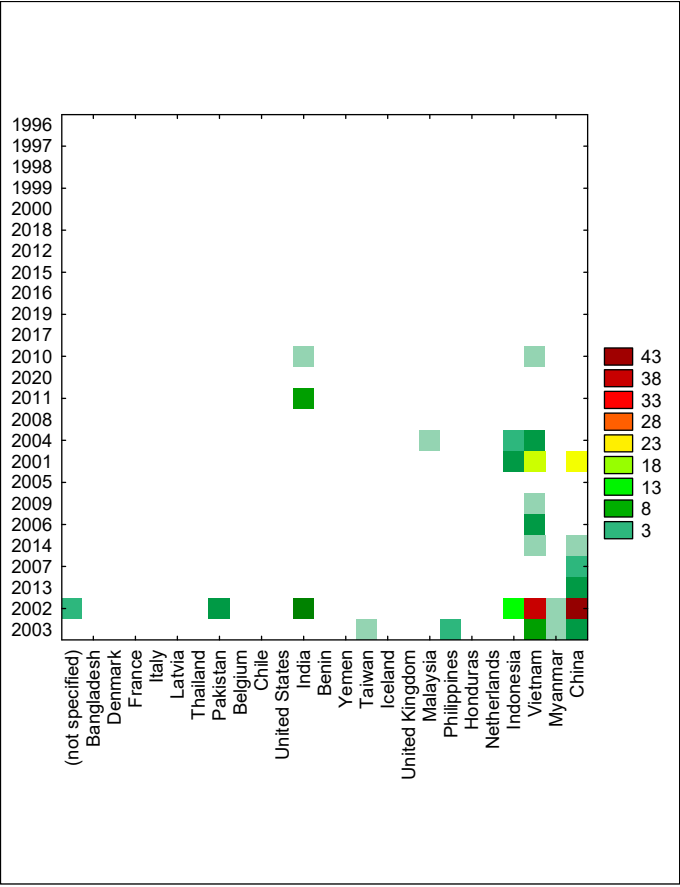

(c)

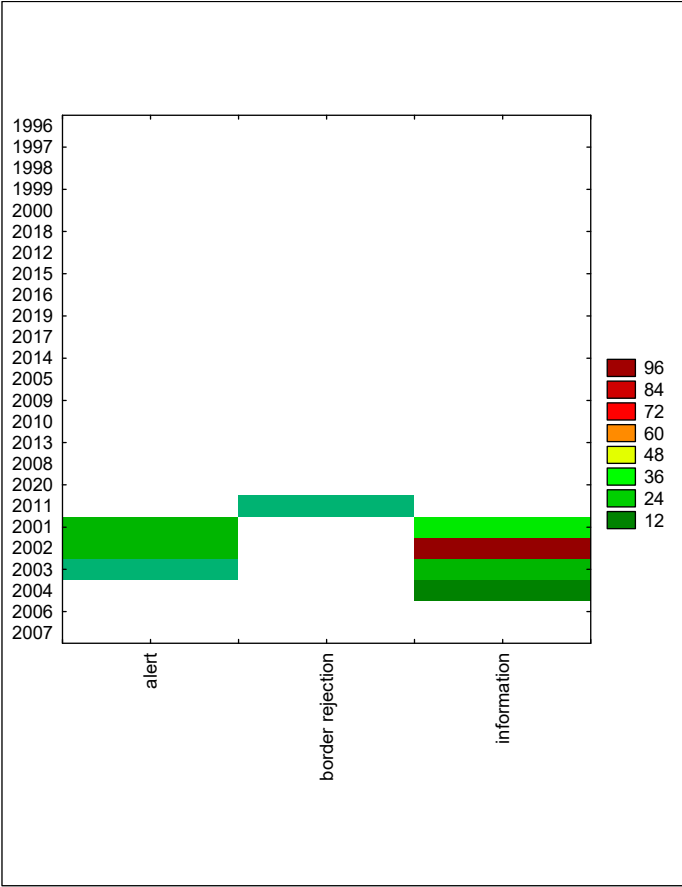

(d)

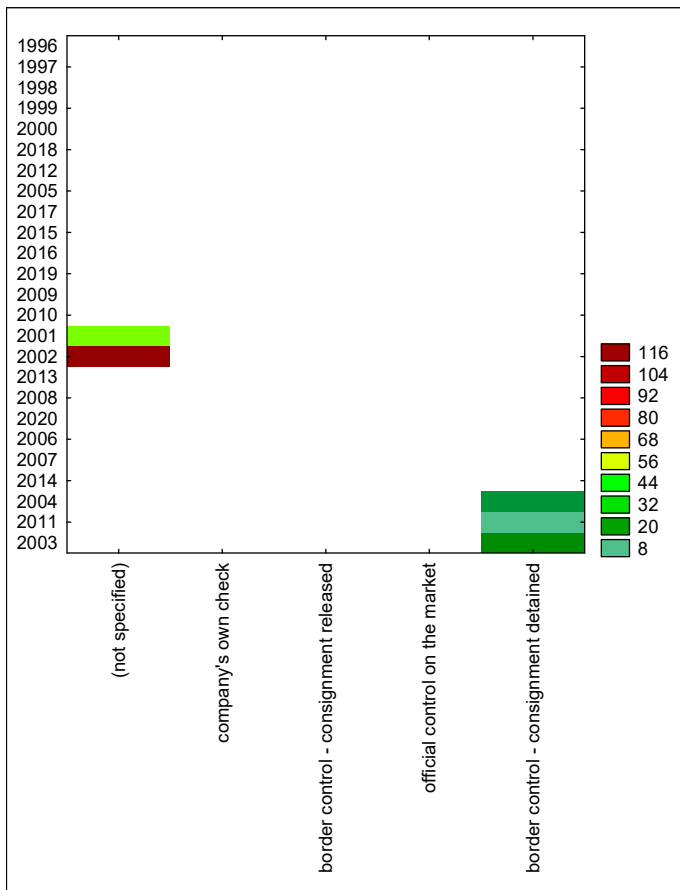

(e)

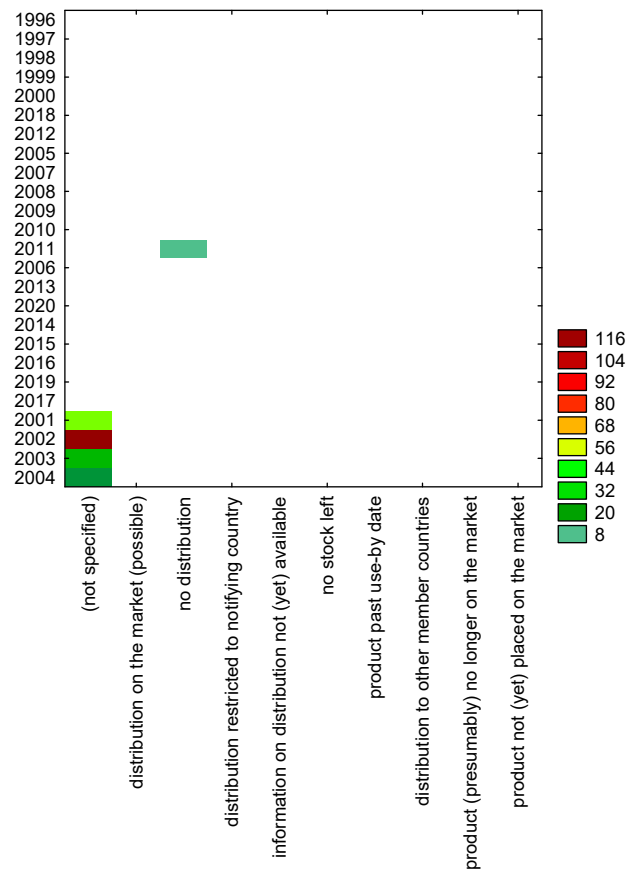

(f)

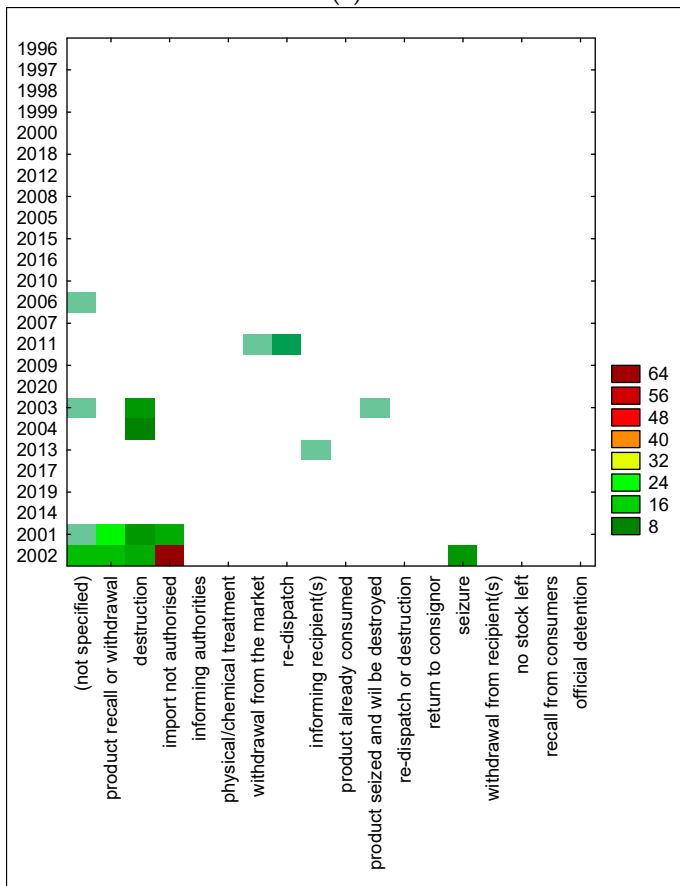

(g)

**Figure S13.** Results of two-way joining cluster analysis related to chloramphenicol; (a) product; (b) notifying country; (c) country of origin; (d) notification type; (e) notification basis; (f) distribution status; (g) action taken.

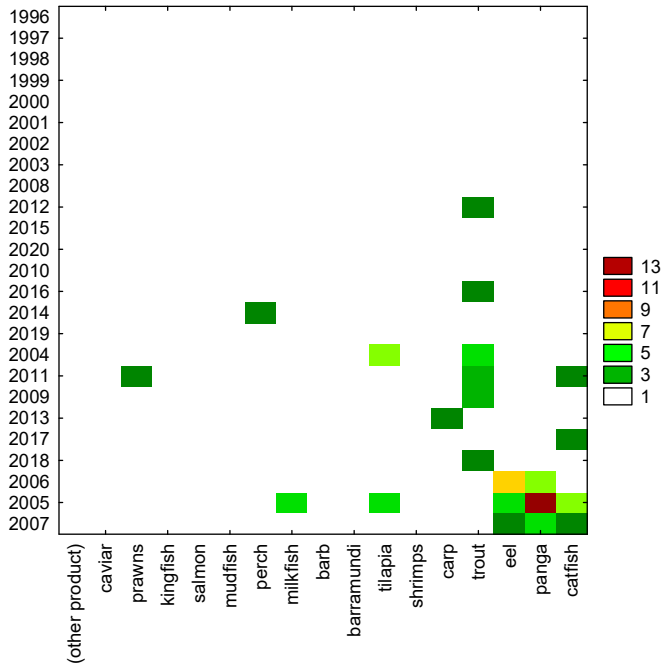

(a)

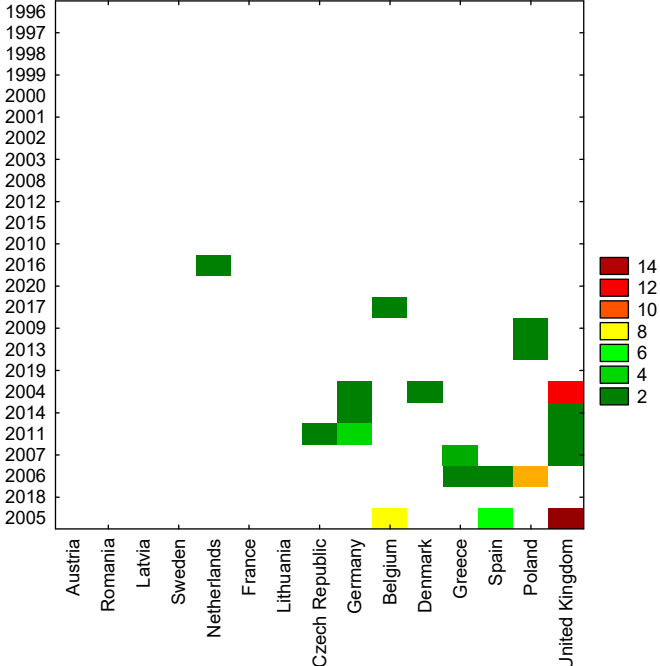

(b)

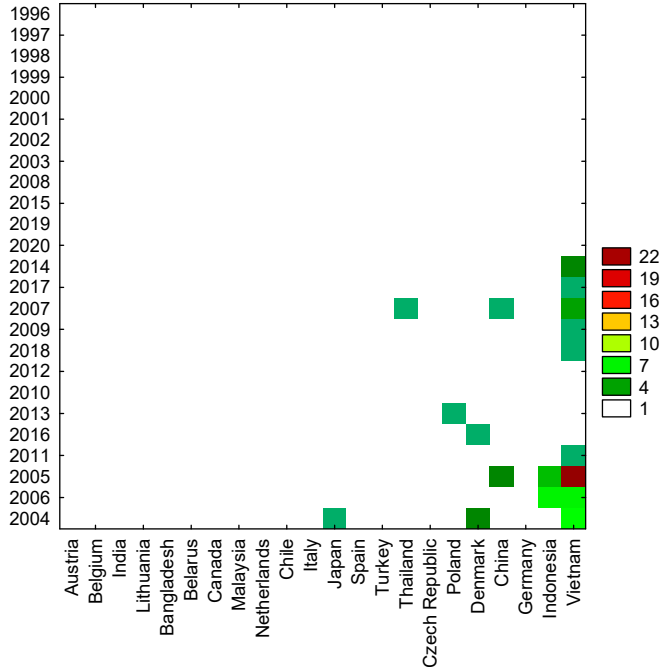

(c)

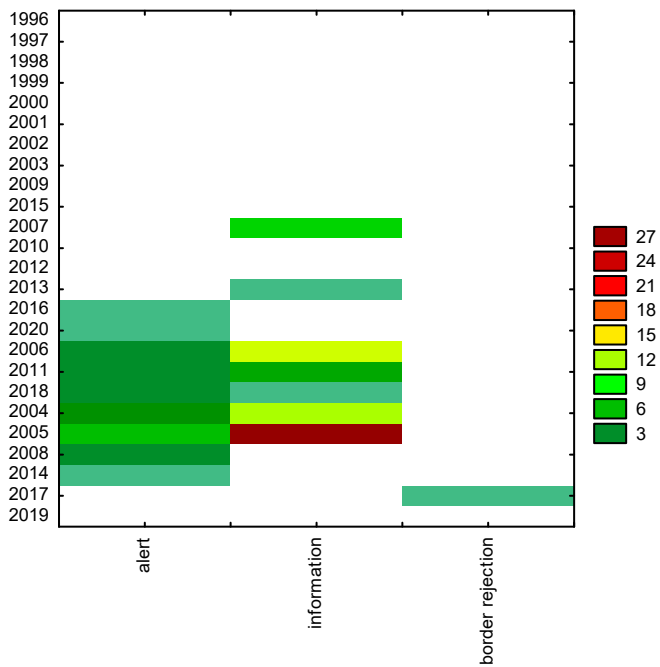

(d)

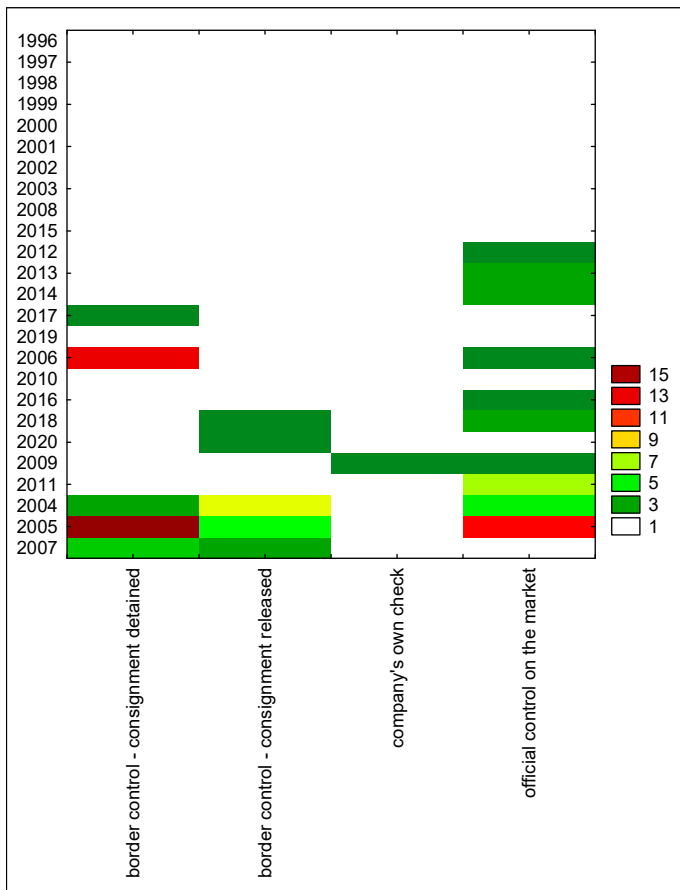

(e)

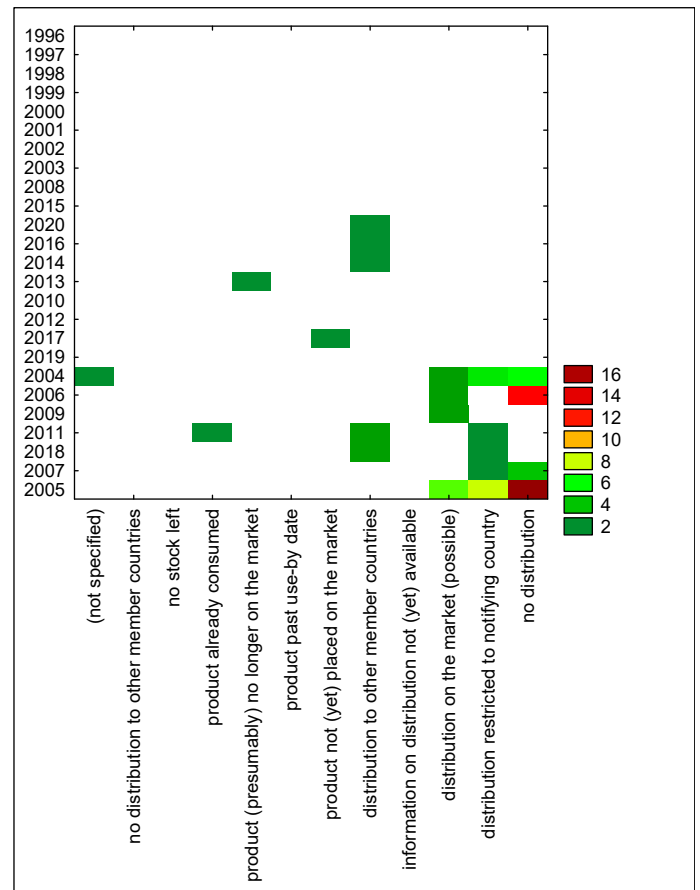

(f)

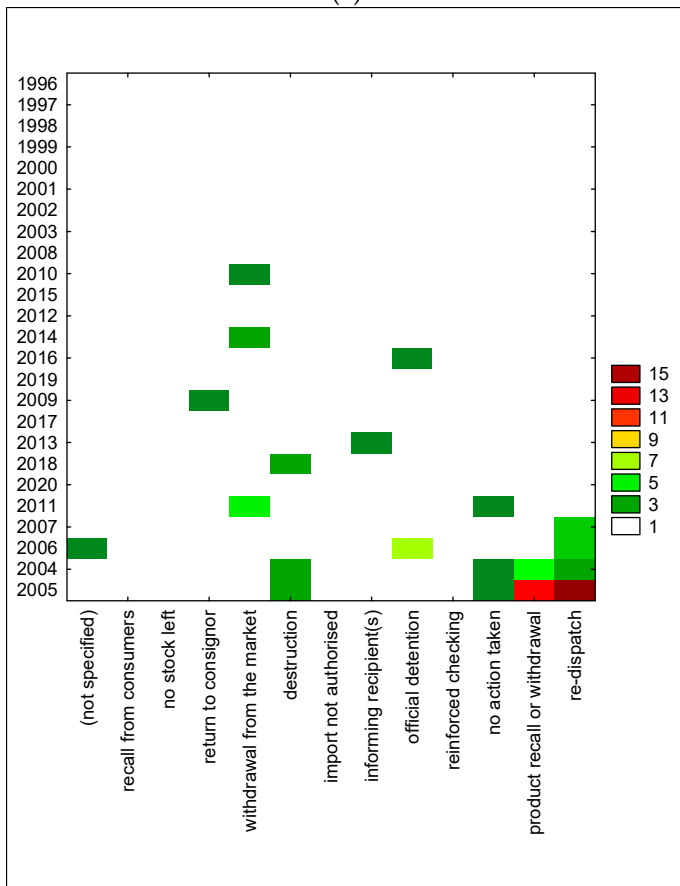

(g)

**Figure S14.** Results of two-way joining cluster analysis related to leucomalachite green; (a) product; (b) notifying country; (c) country of origin; (d) notification type; (e) notification basis; (f) distribution status; (g) action taken.

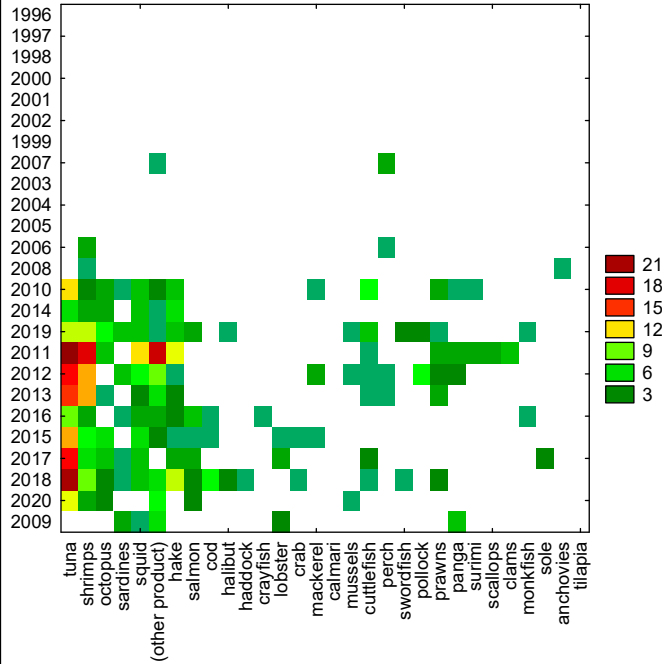

(a)

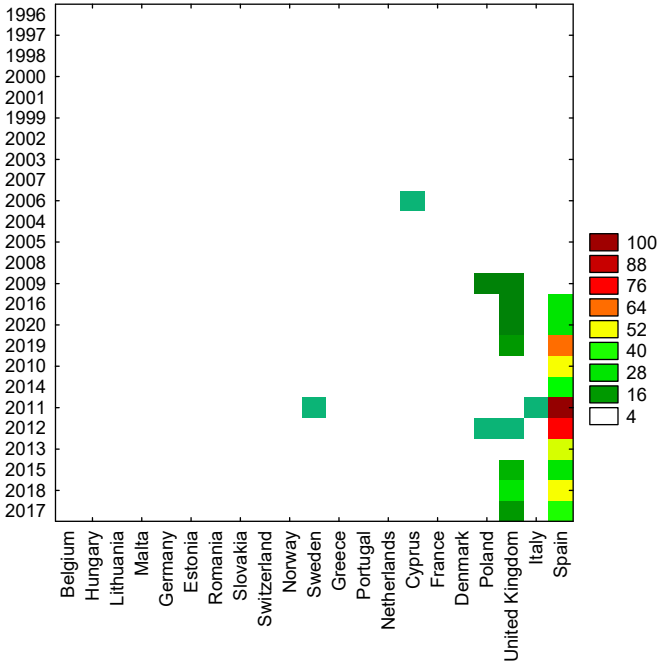

(b)

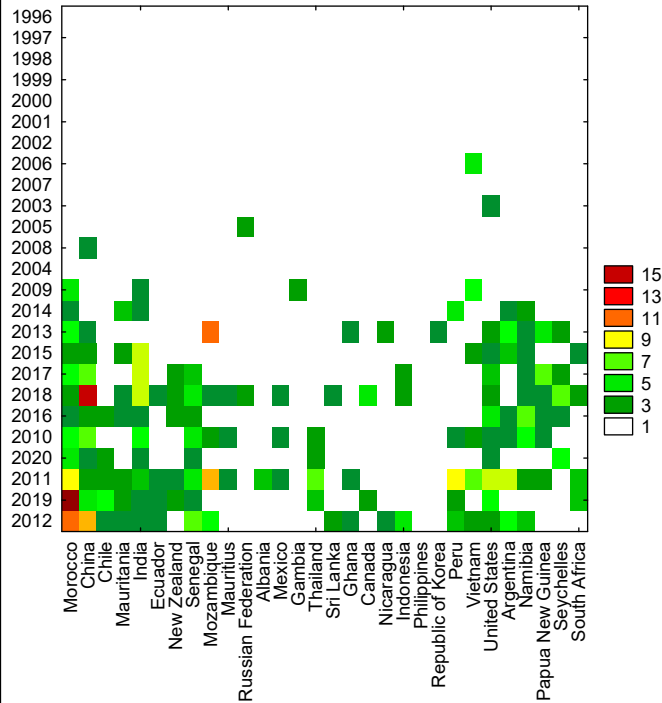

(c)

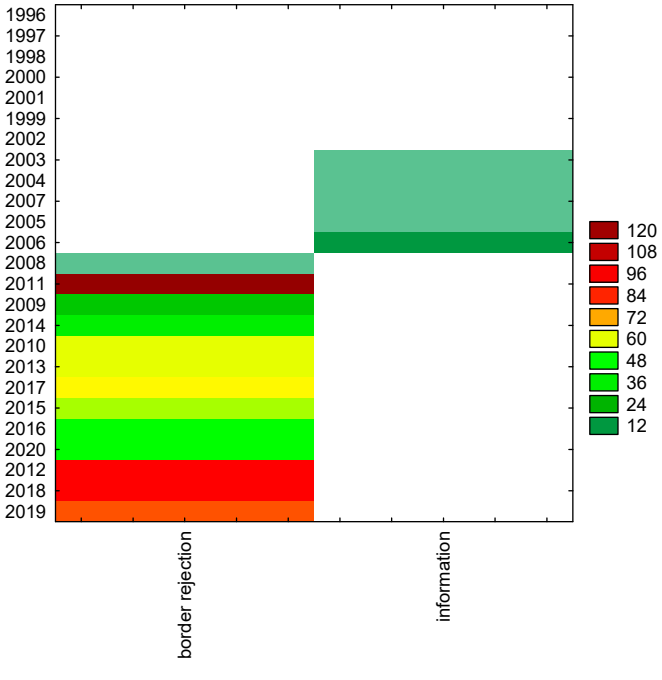

(d)

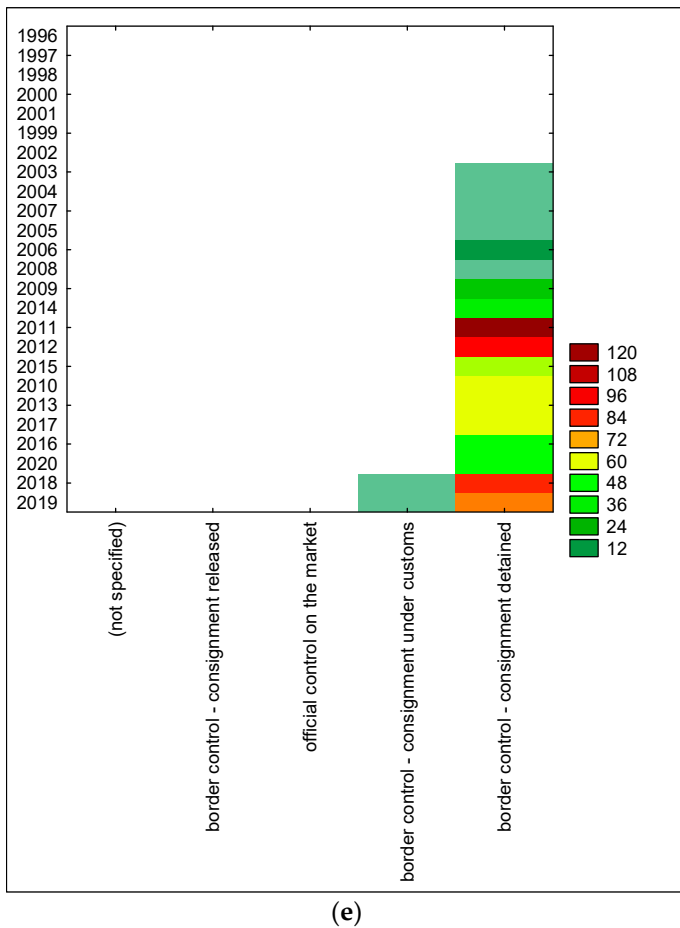

(e)

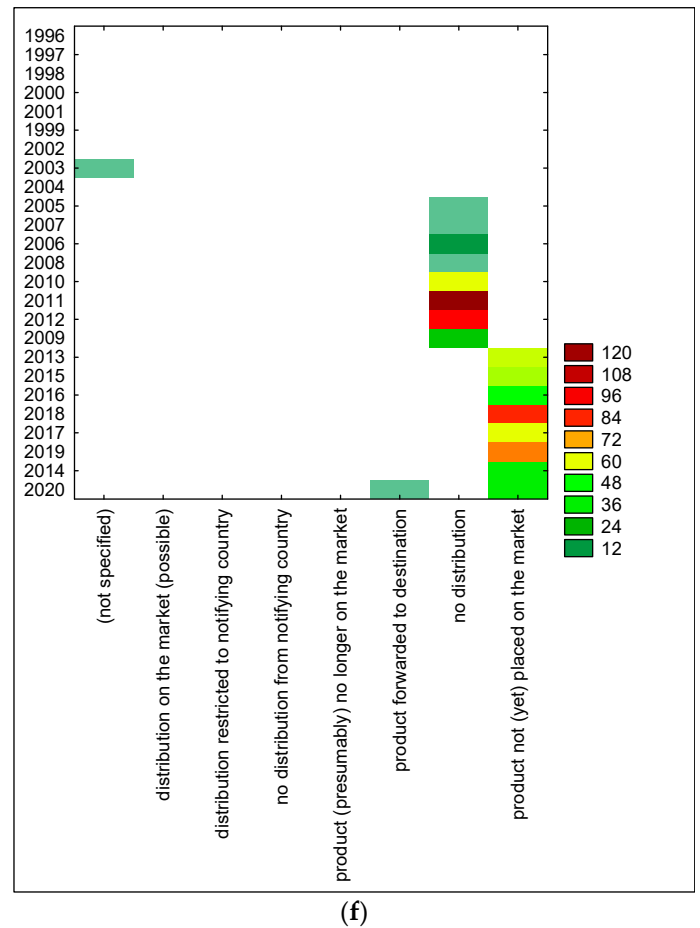

(f)

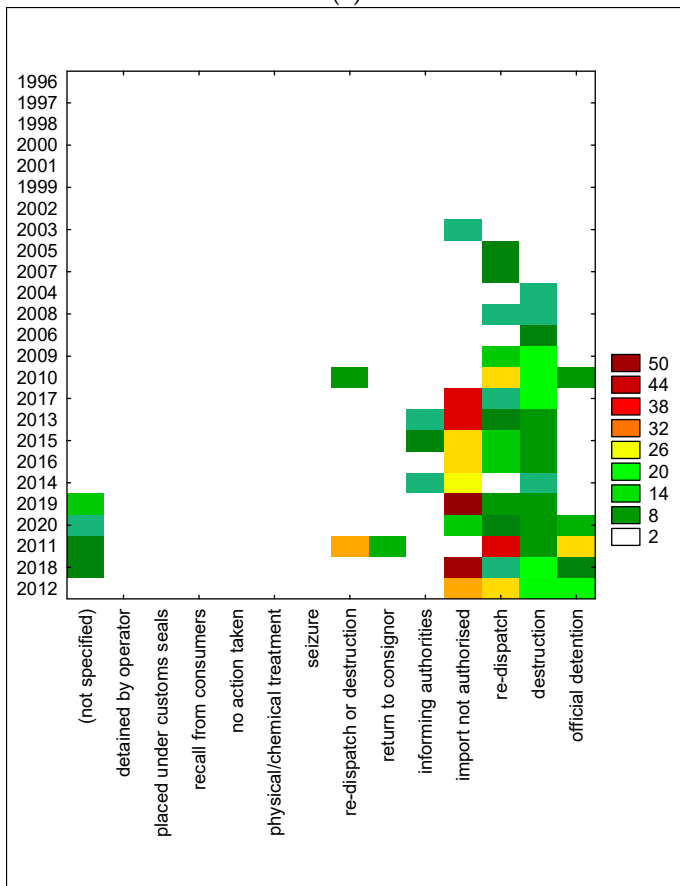

(g)

**Figure S15.** Results of two-way joining cluster analysis related to poor temperature control; (a) product; (b) notifying country; (c) country of origin; (d) notification type; (e) notification basis; (f) distribution status; (g) action taken.

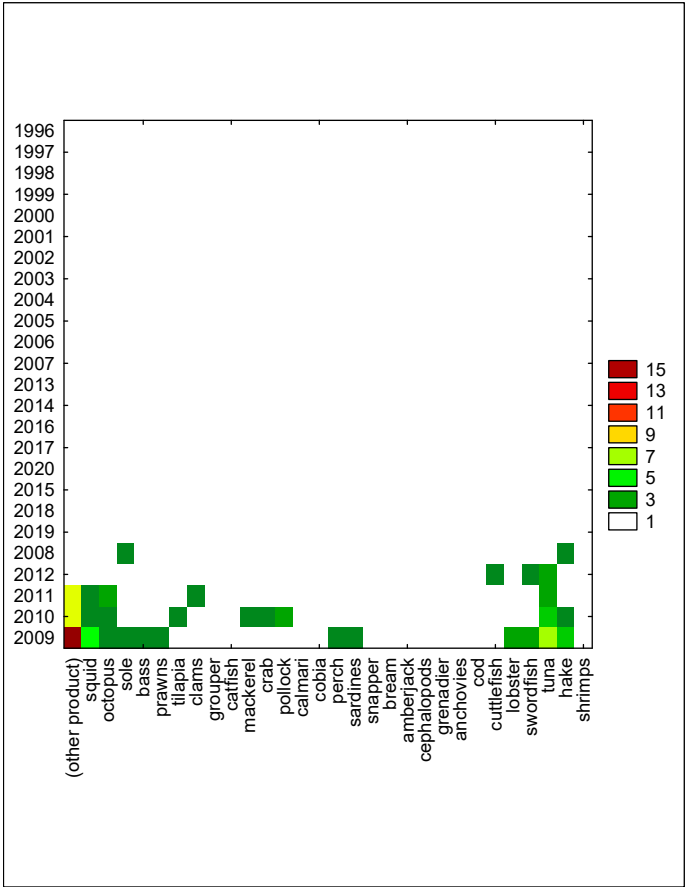

(a)

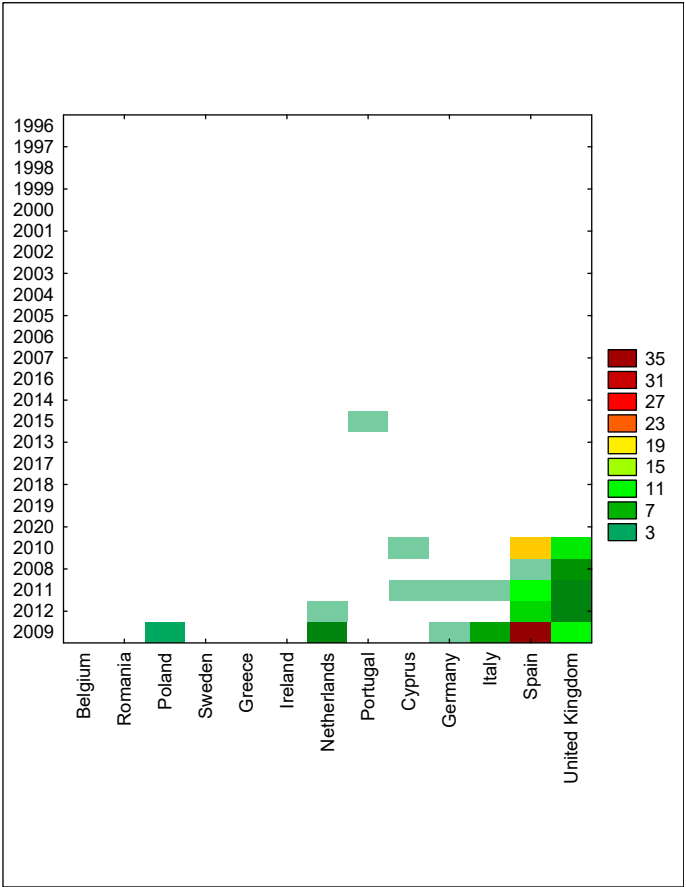

(b)

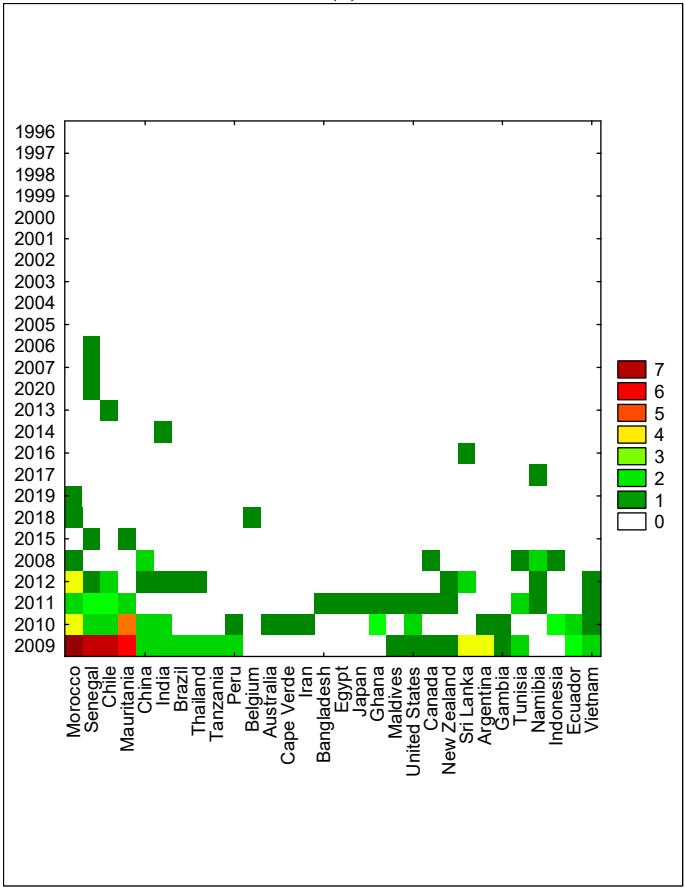

(c)

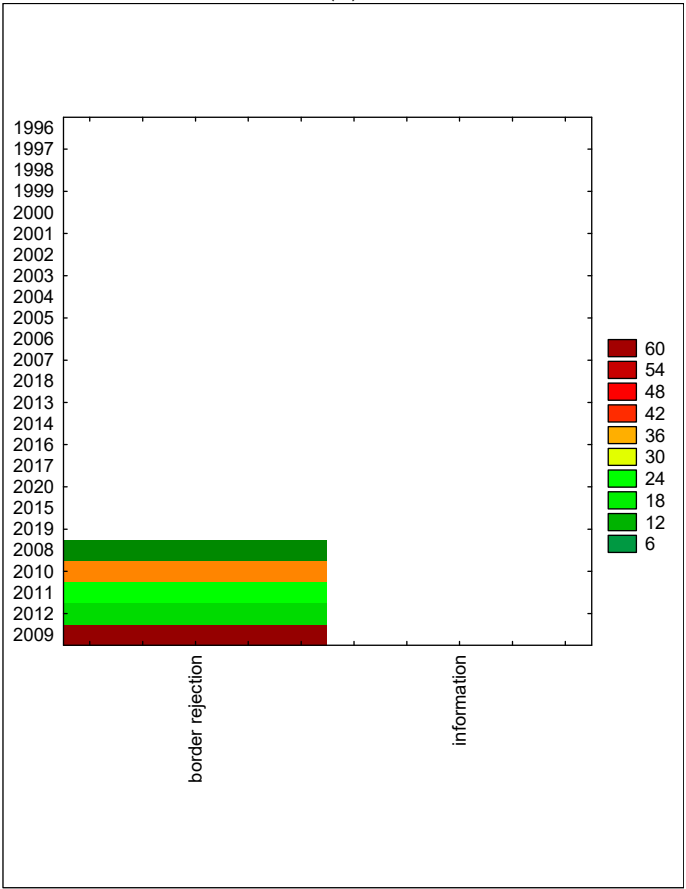

(d)

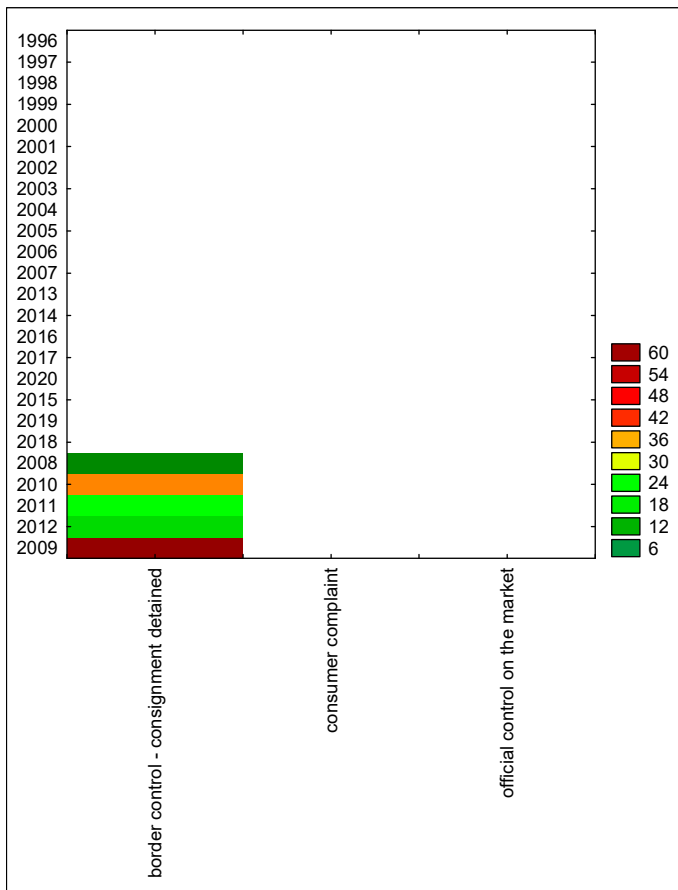

(e)

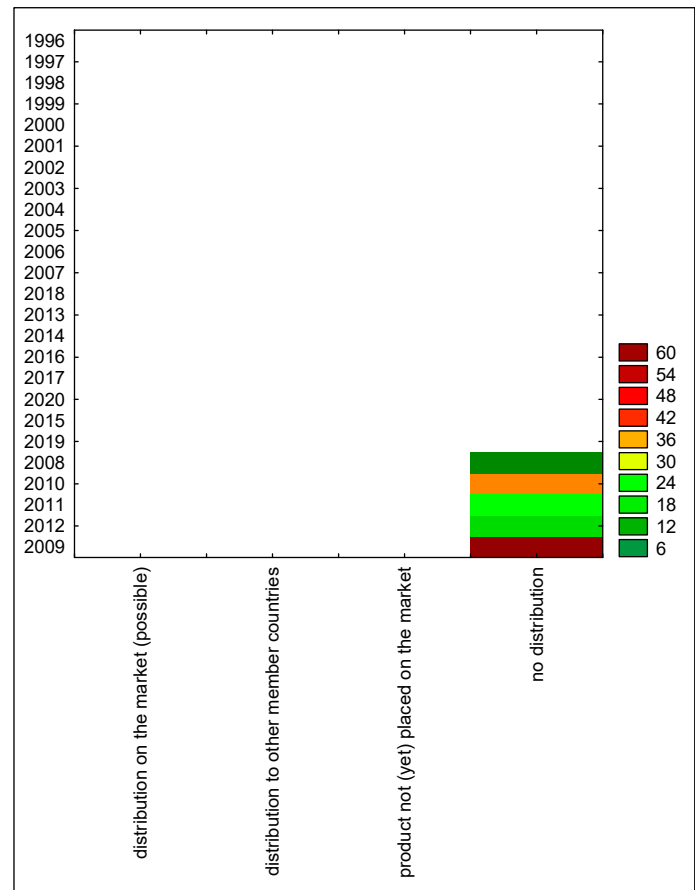

(f)

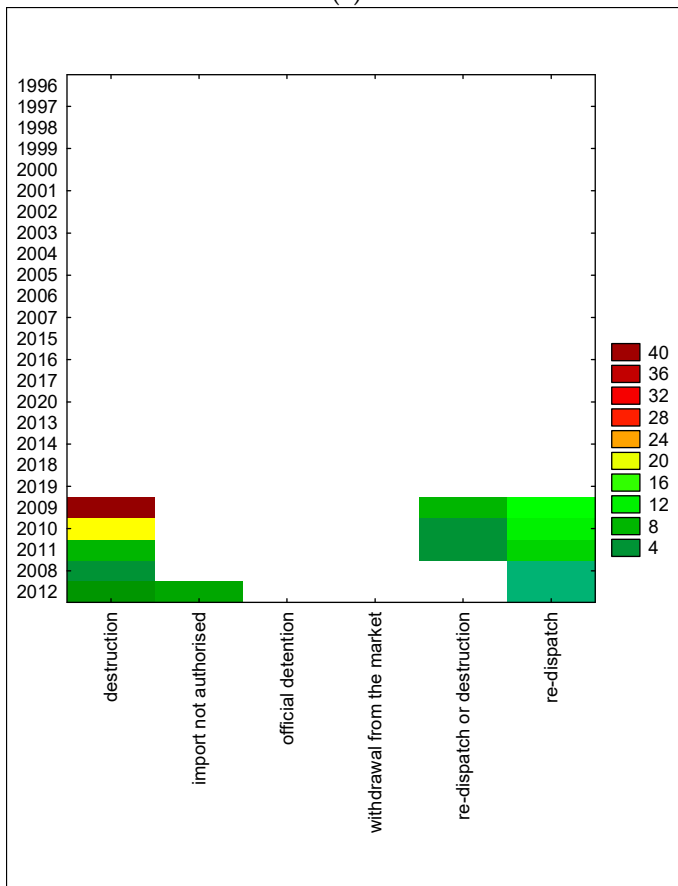

(g)

**Figure S16.** Results of two-way joining cluster analysis related to poor hygienic state; (a) product; (b) notifying country; (c) country of origin; (d) notification type; (e) notification basis; (f) distribution status; (g) action taken.



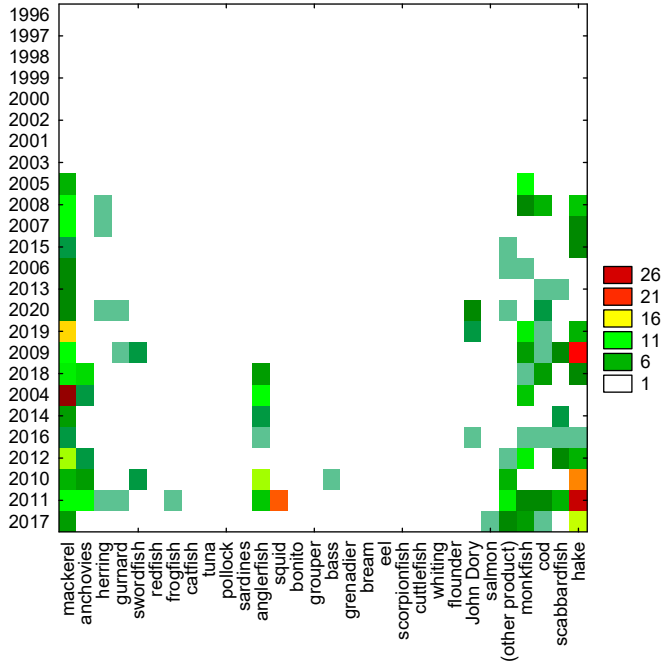

(a)

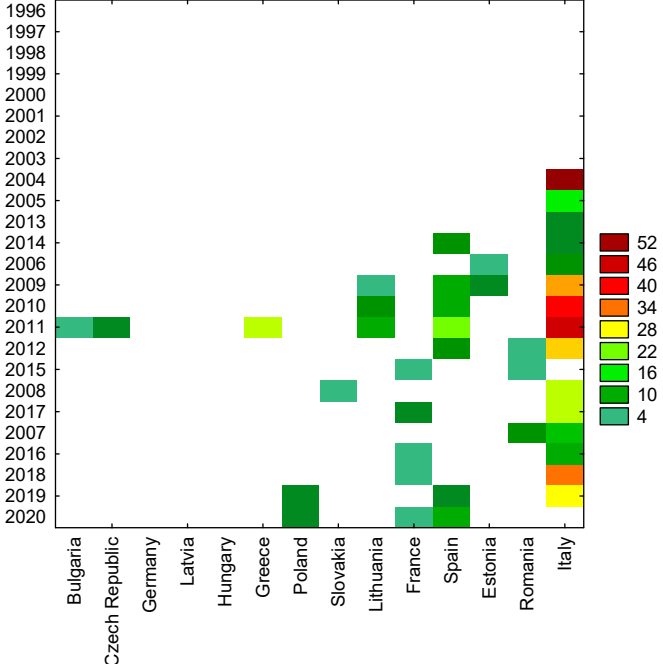

(b)

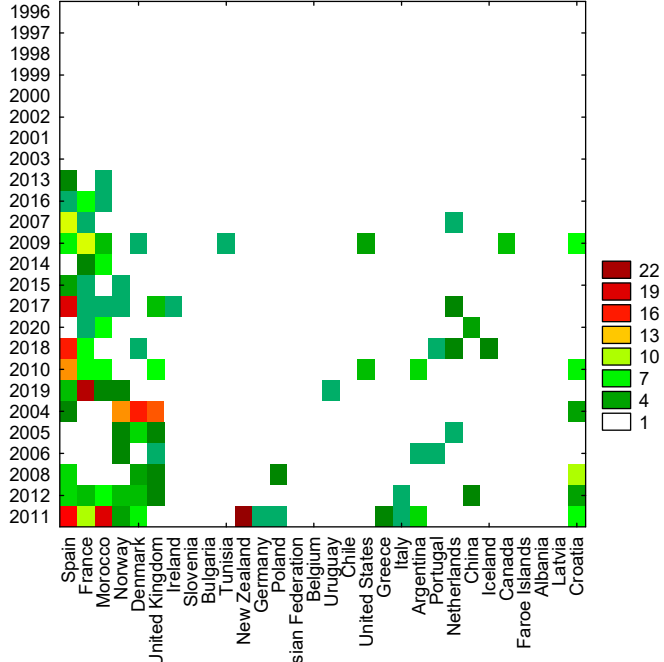

(c)

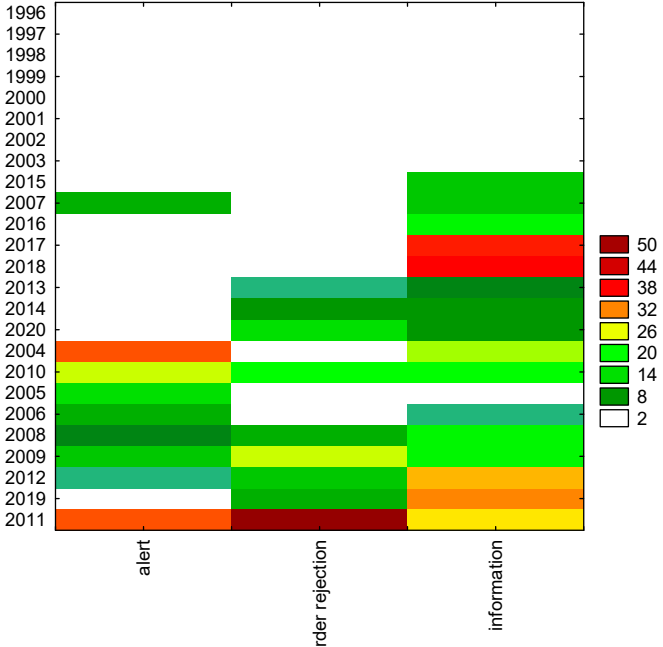

(d)

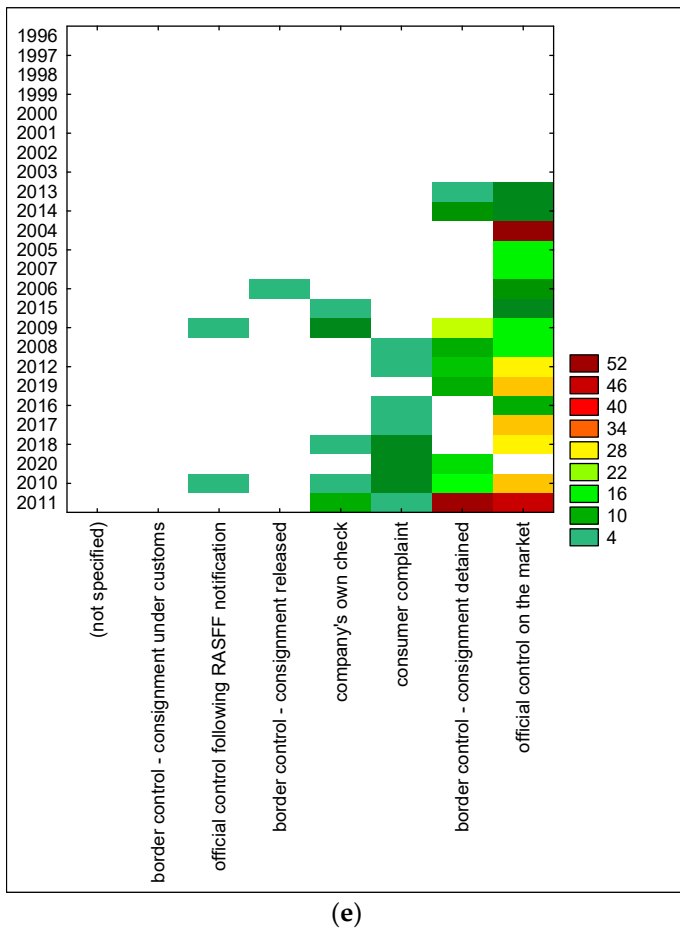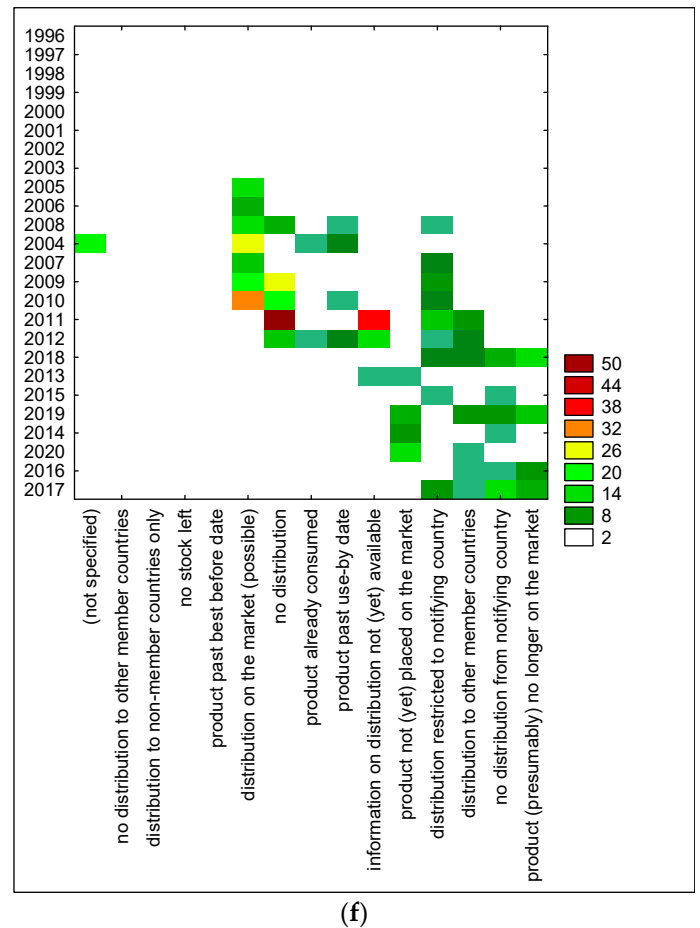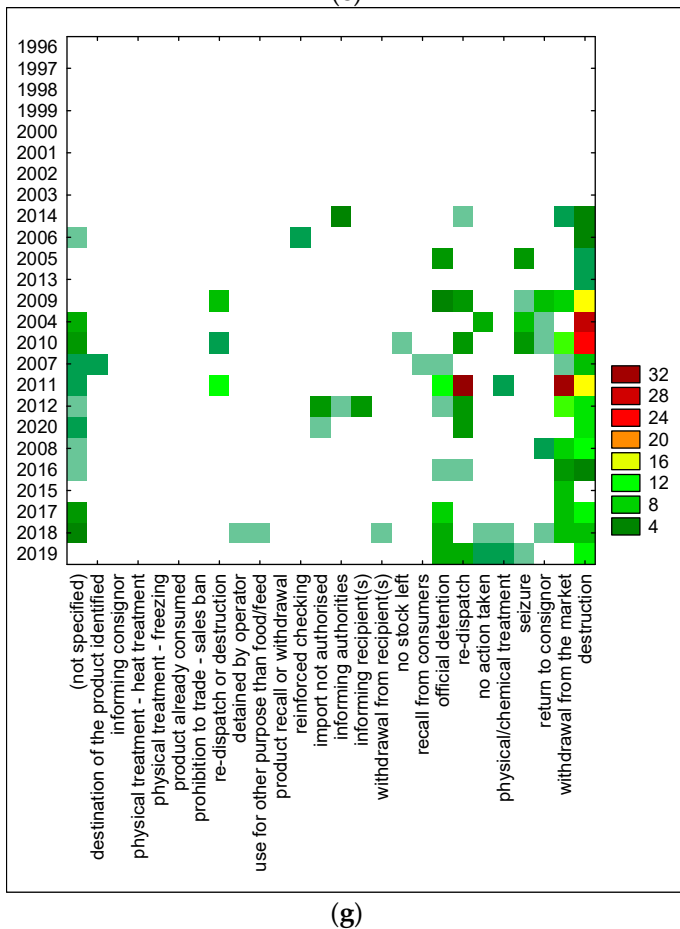

**Figure S17.** Results of two-way joining cluster analysis related to *Anisakis*; (a) product; (b) notifying country; (c) country of origin; (d) notification type; (e) notification basis; (f) distribution status; (g) action taken.

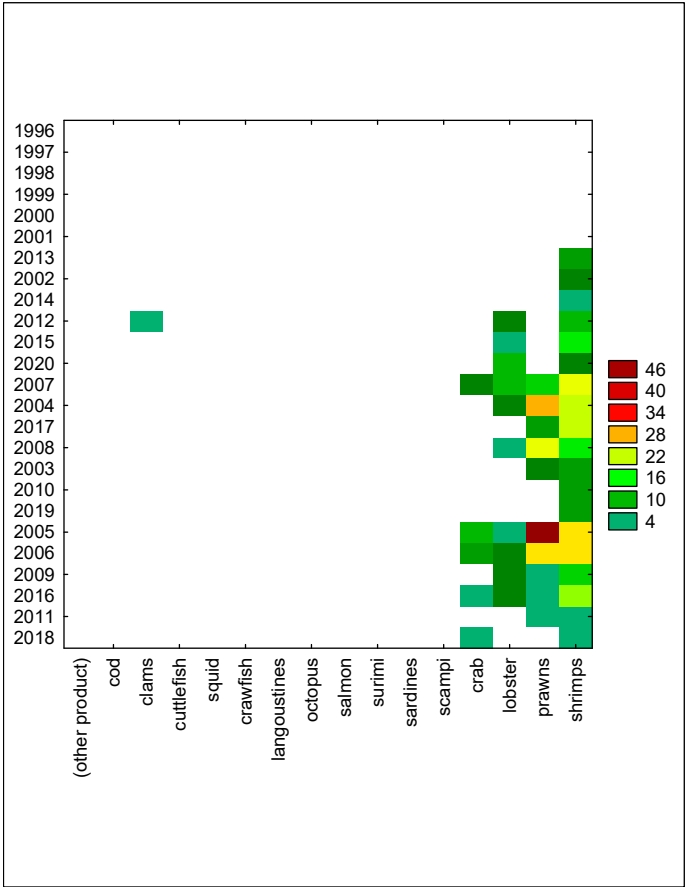

(a)

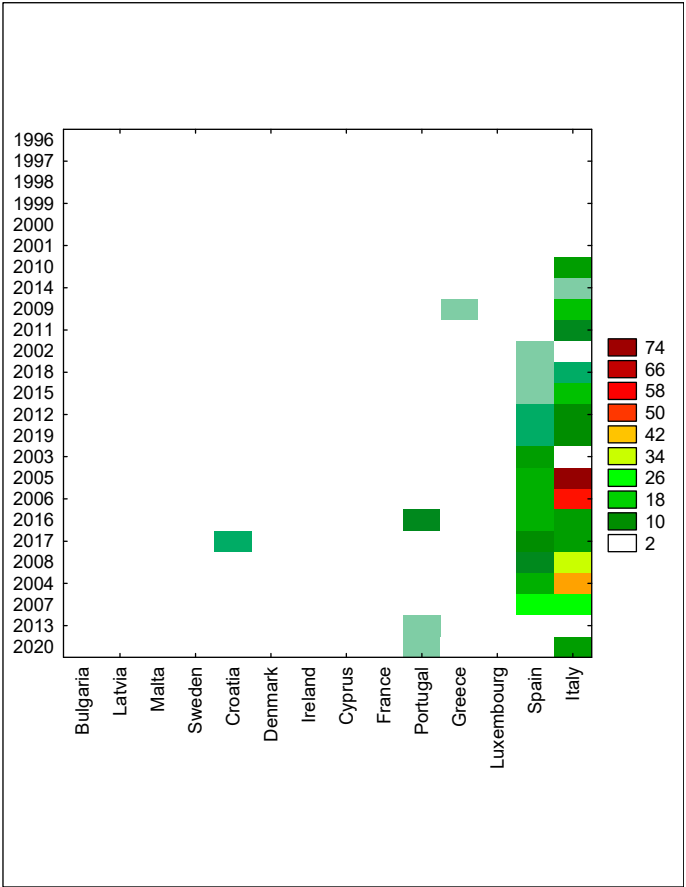

(b)

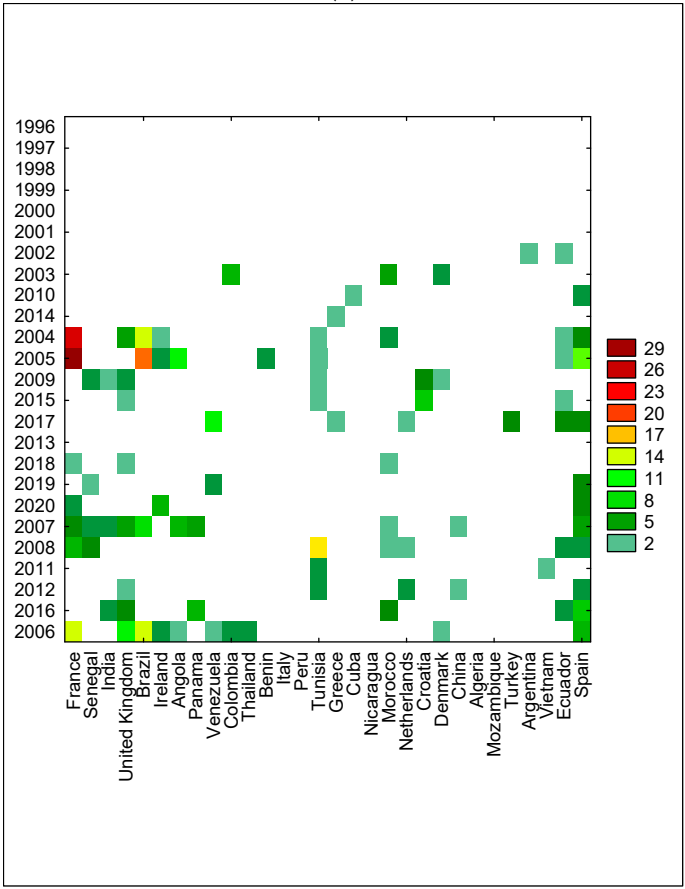

(c)

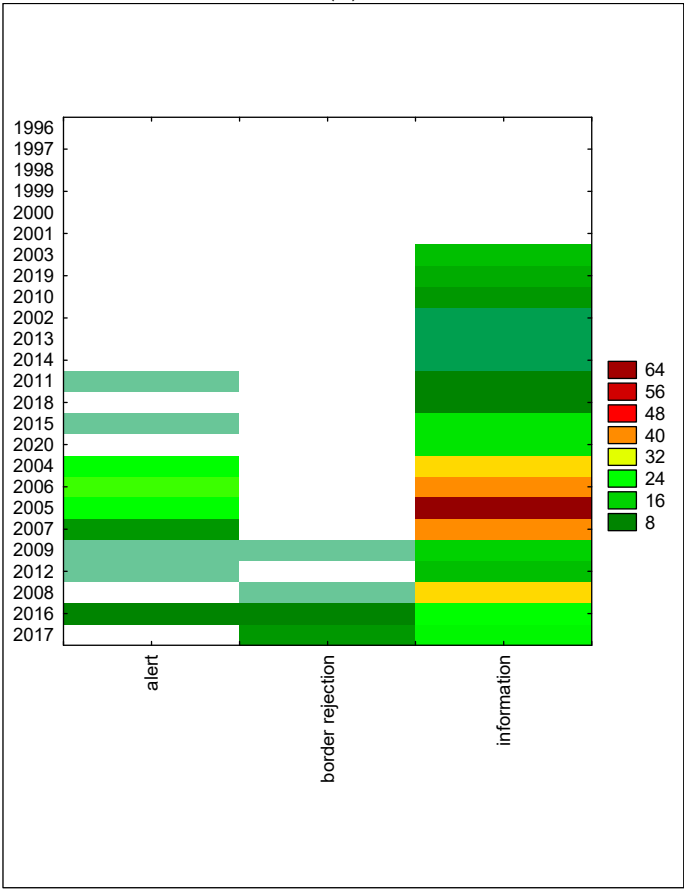

(d)

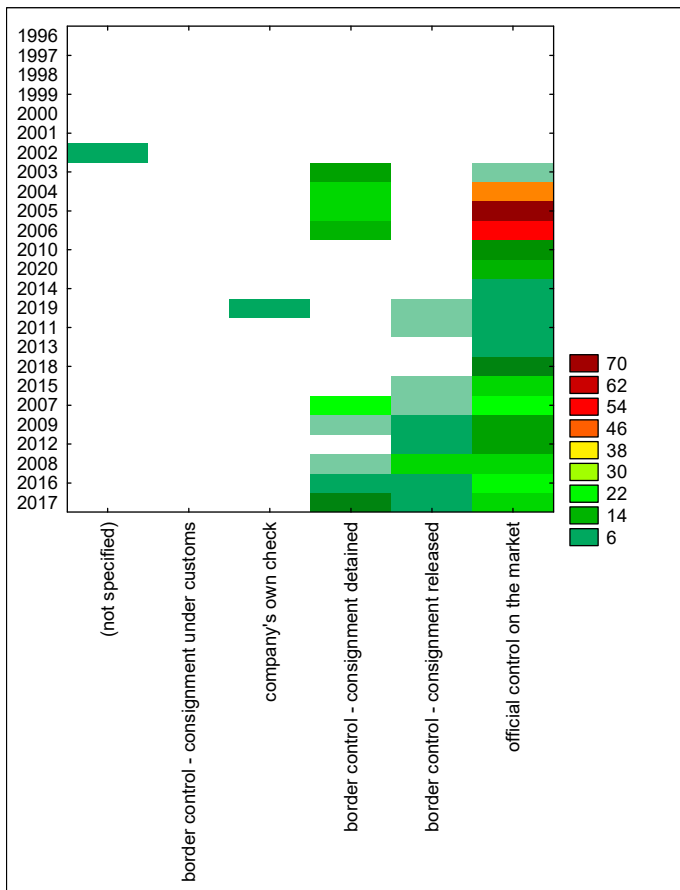

(e)

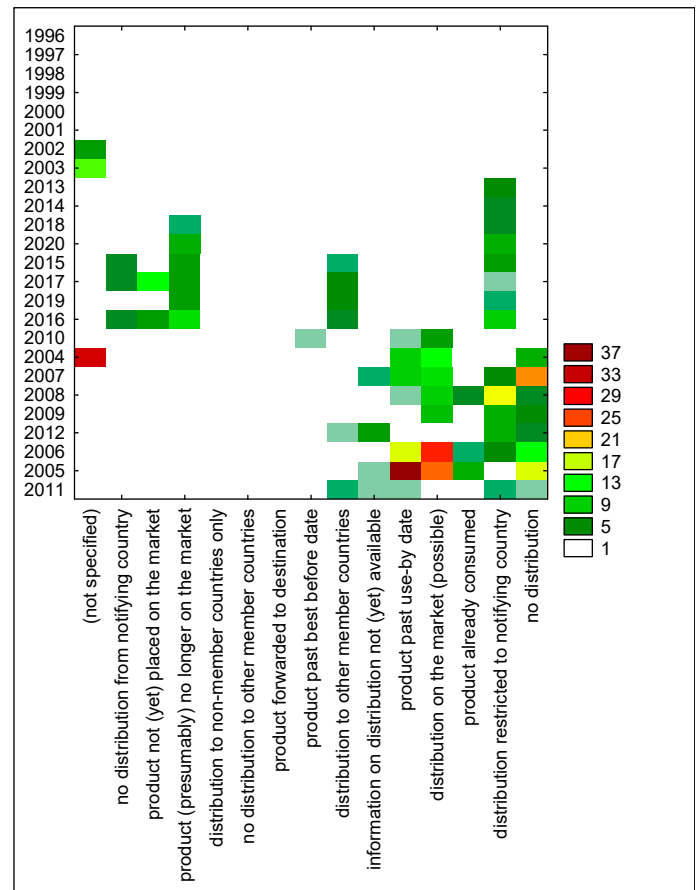

(f)

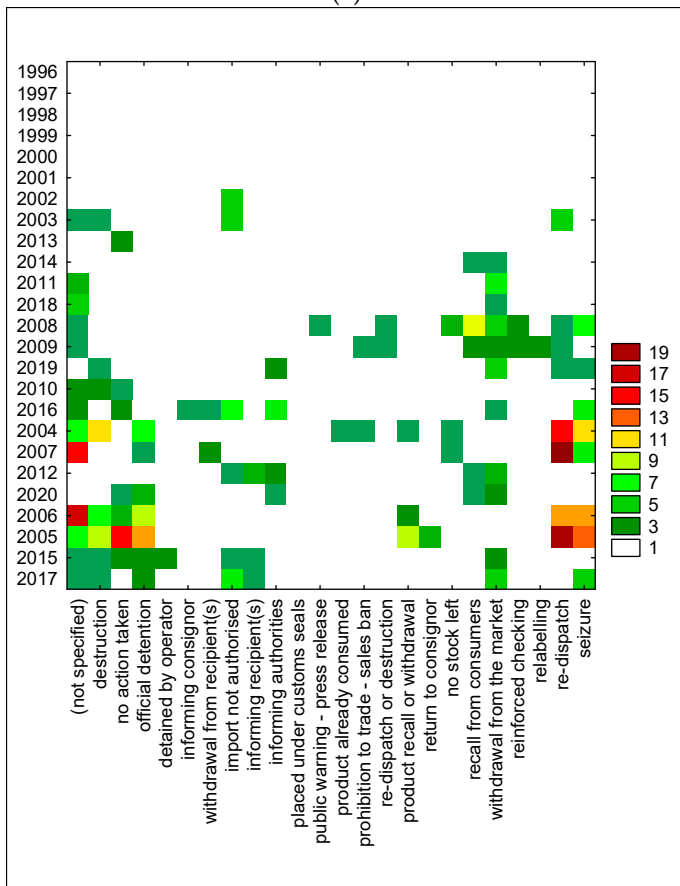

(g)

**Figure S18.** Results of two-way joining cluster analysis related to sulphite; (a) product; (b) notifying country; (c) country of origin; (d) notification type; (e) notification basis; (f) distribution status; (g) action taken

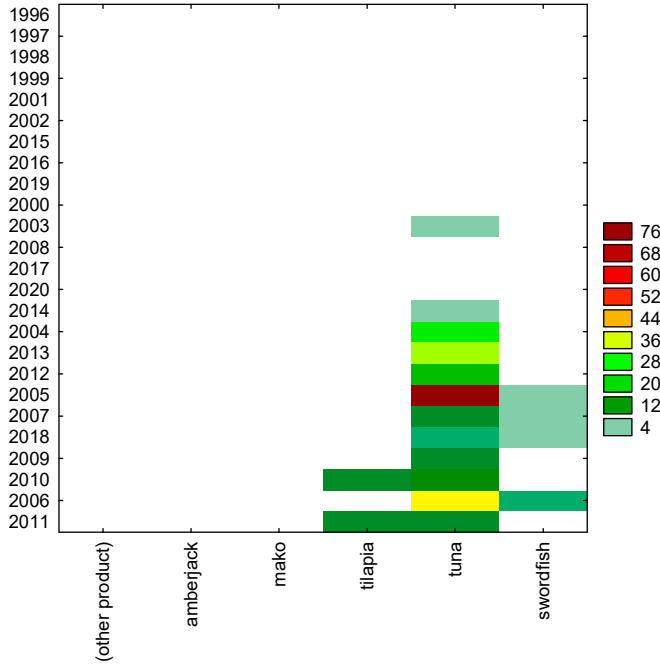

(a)

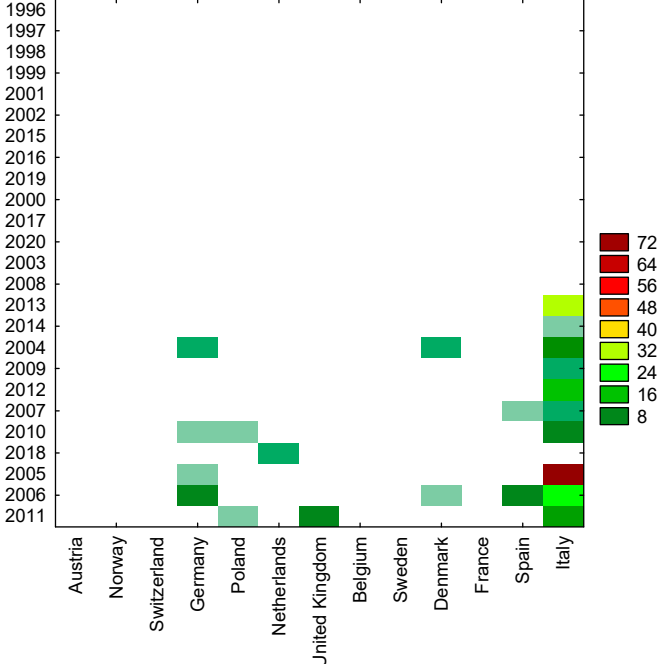

(b)

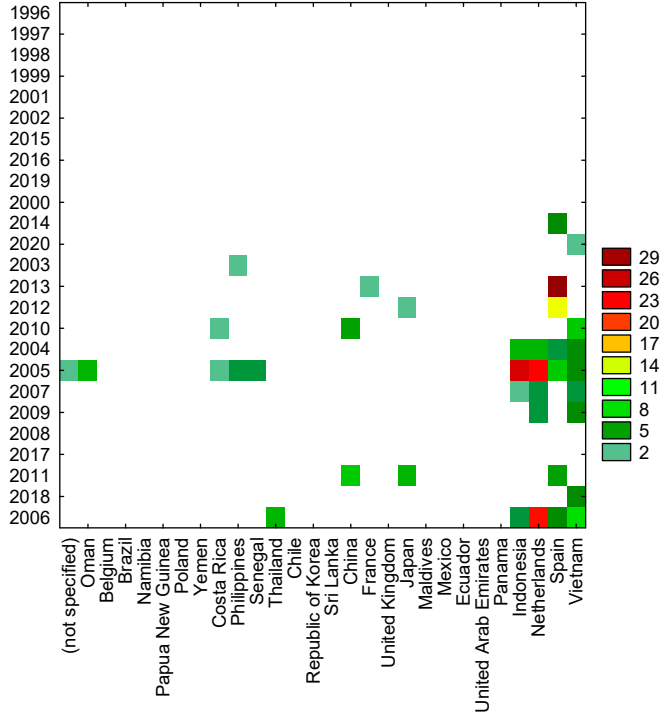

(c)

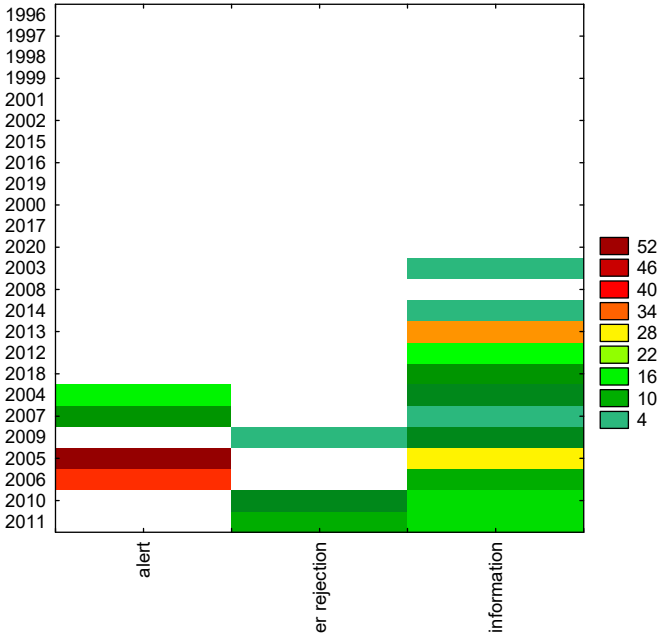

(d)

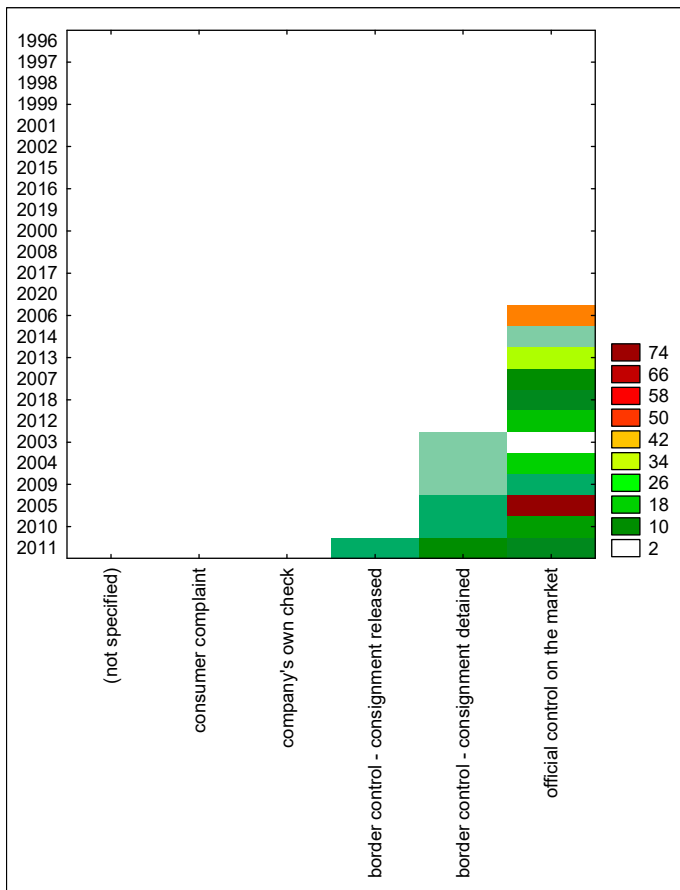

(e)

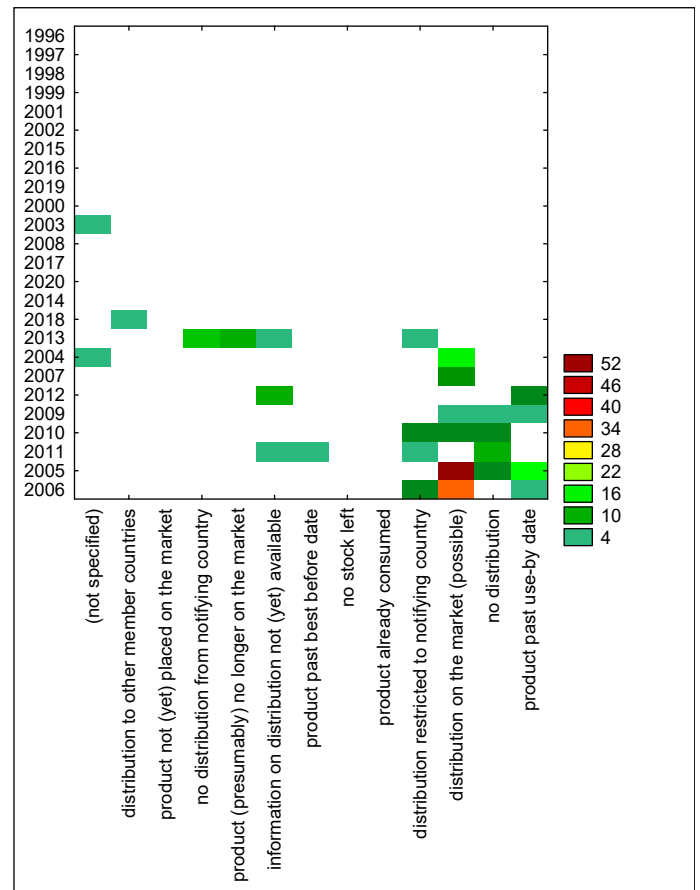

(f)

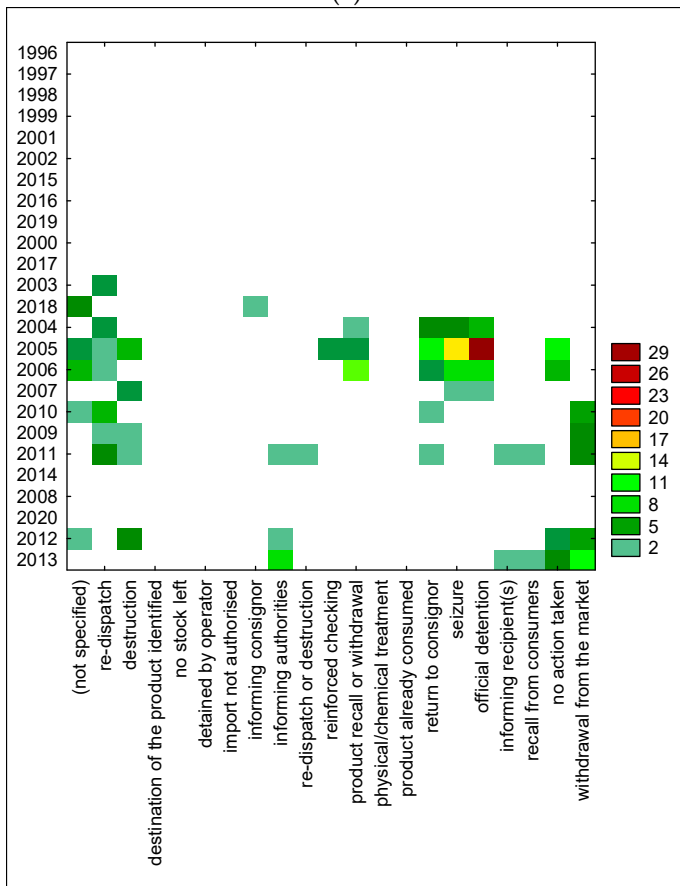

(g)

**Figure S19.** Results of two-way joining cluster analysis related to carbon monoxide; (a) product; (b) notifying country; (c) country of origin; (d) notification type; (e) notification basis; (f) distribution status; (g) action taken.

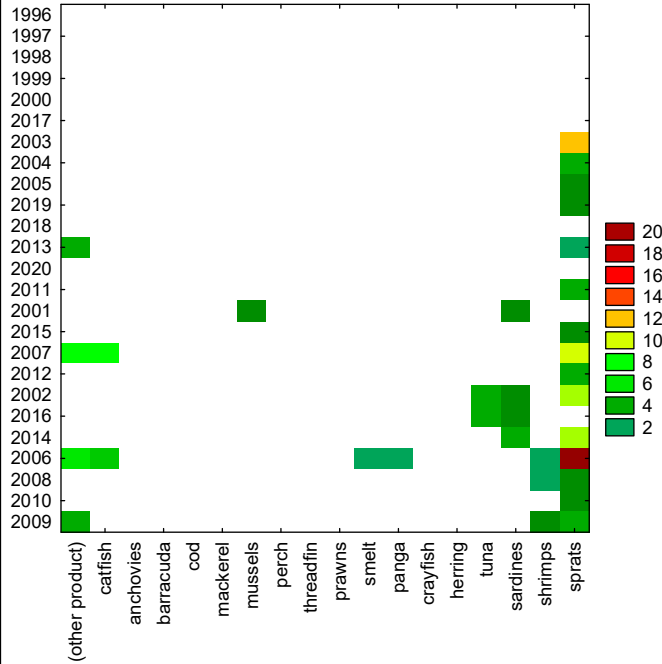

(a)

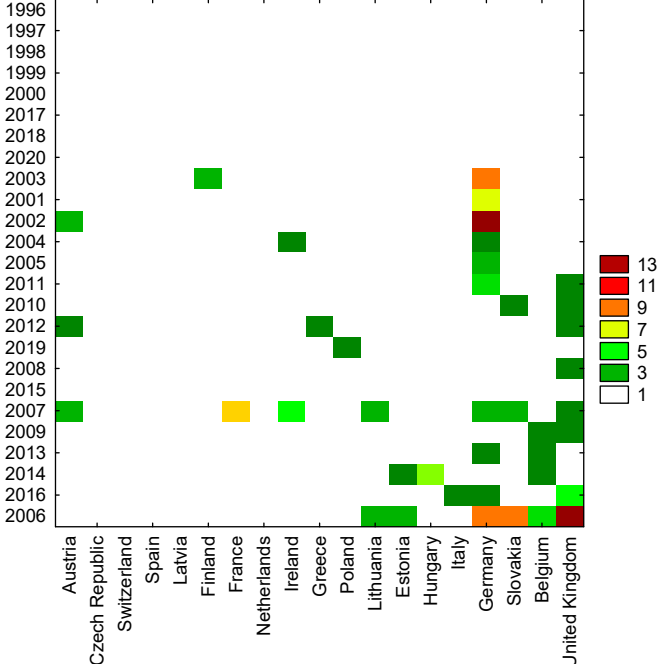

(b)

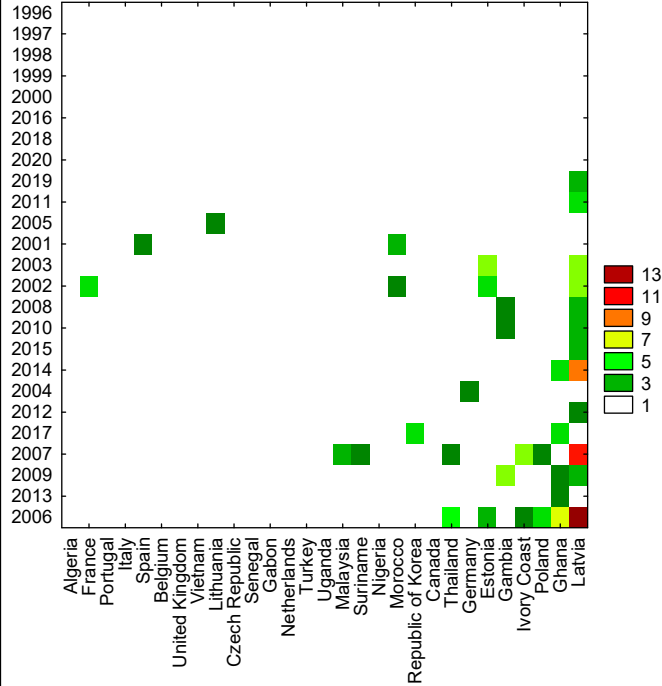

(c)

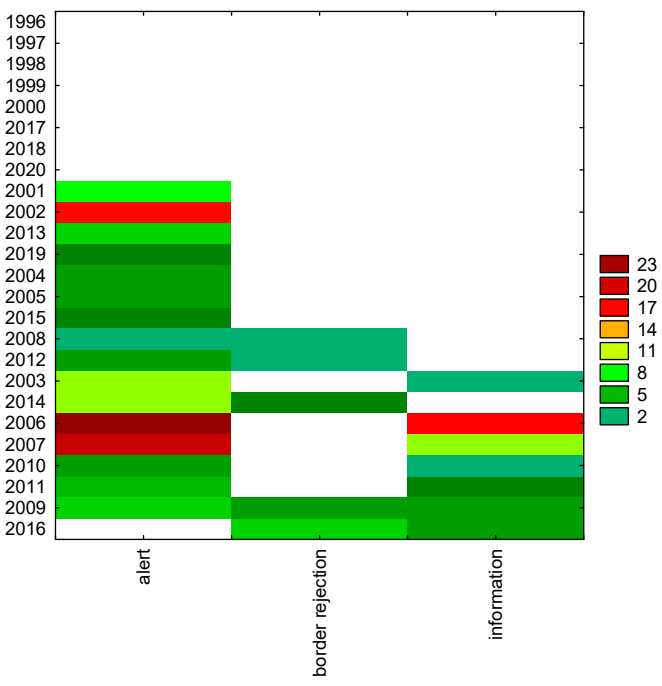

(d)

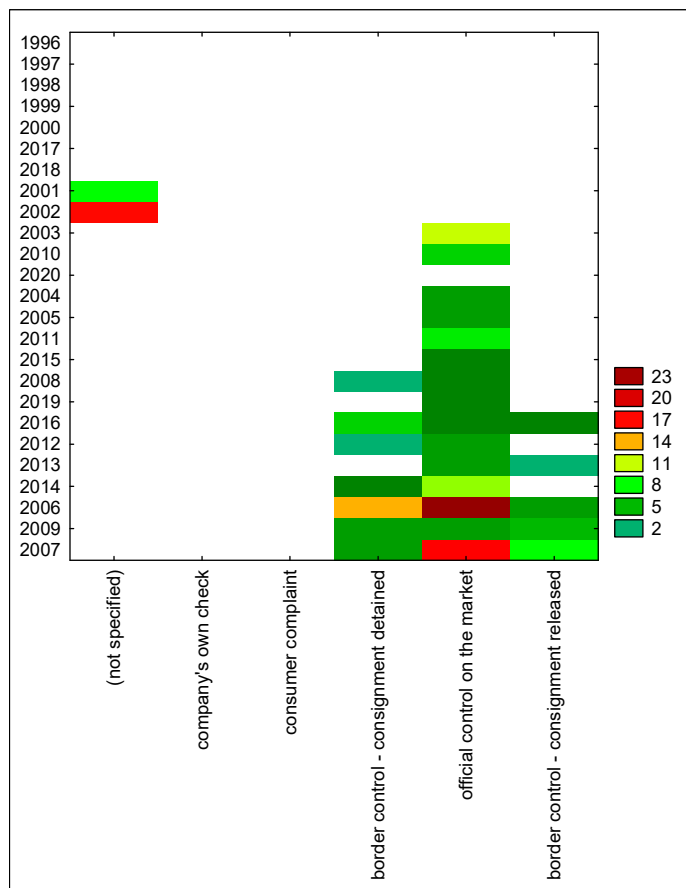

(e)

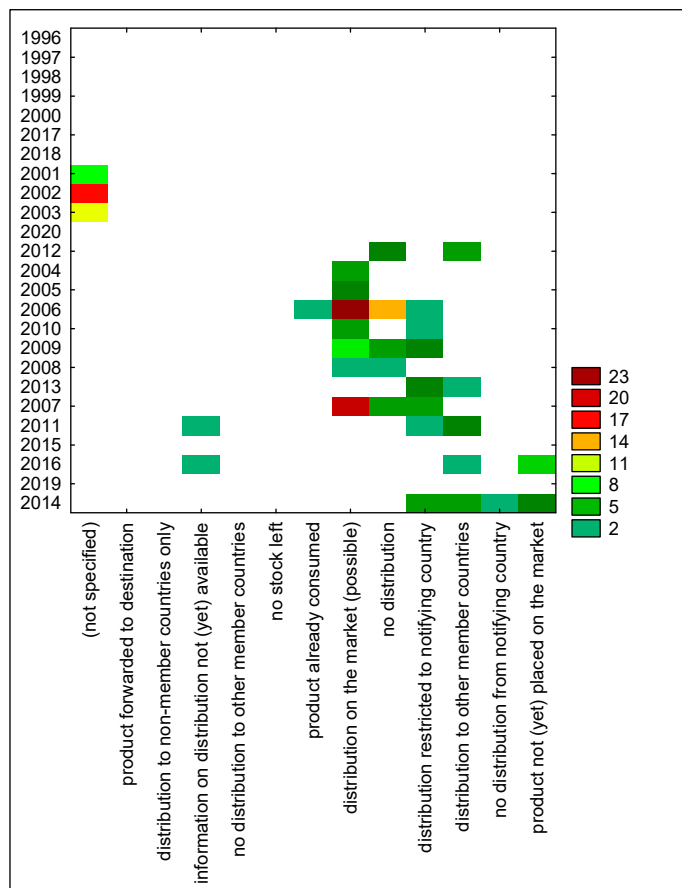

(f)

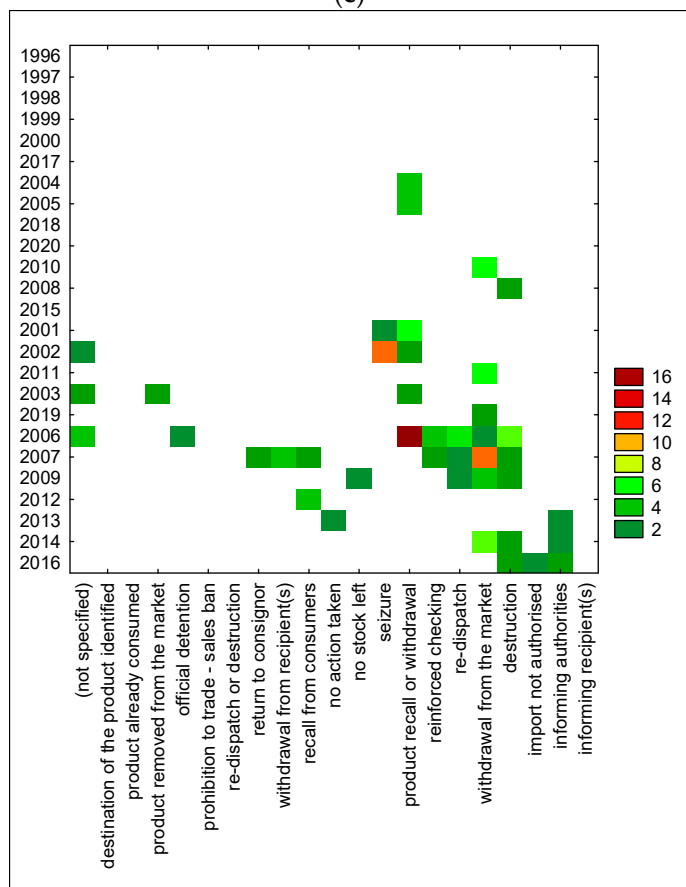

(g)

**Figure S20.** Results of two-way joining cluster analysis related to benzo(a)pyrene; (a) product; (b) notifying country; (c) country of origin; (d) notification type; (e) notification basis; (f) distribution status; (g) action taken.



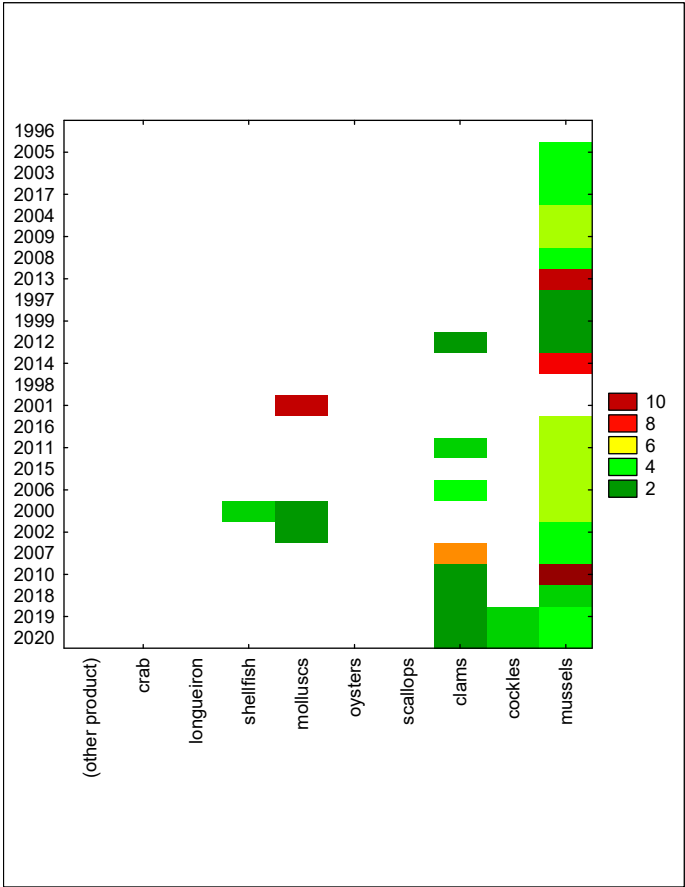

(a)

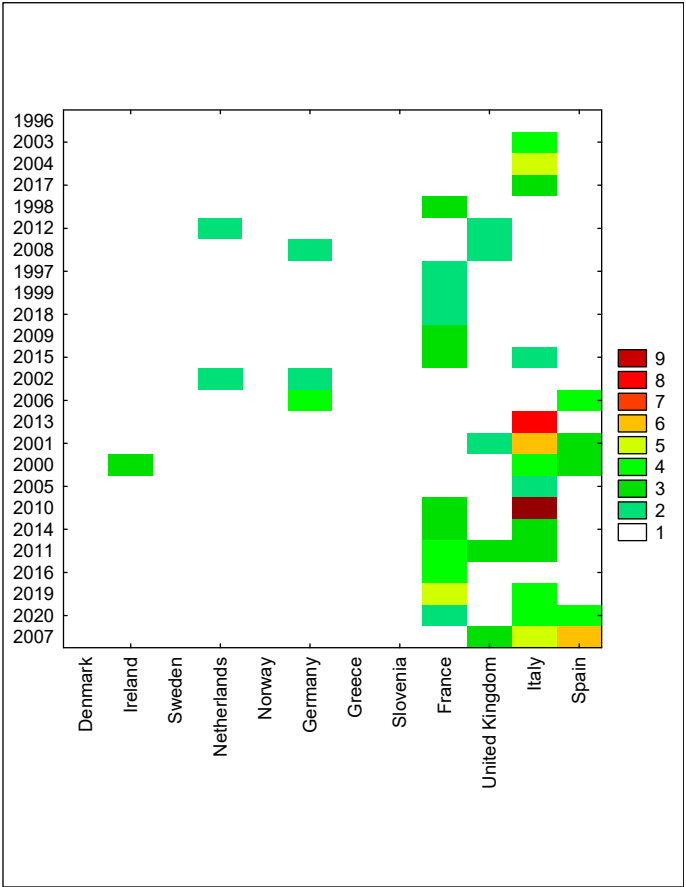

(b)

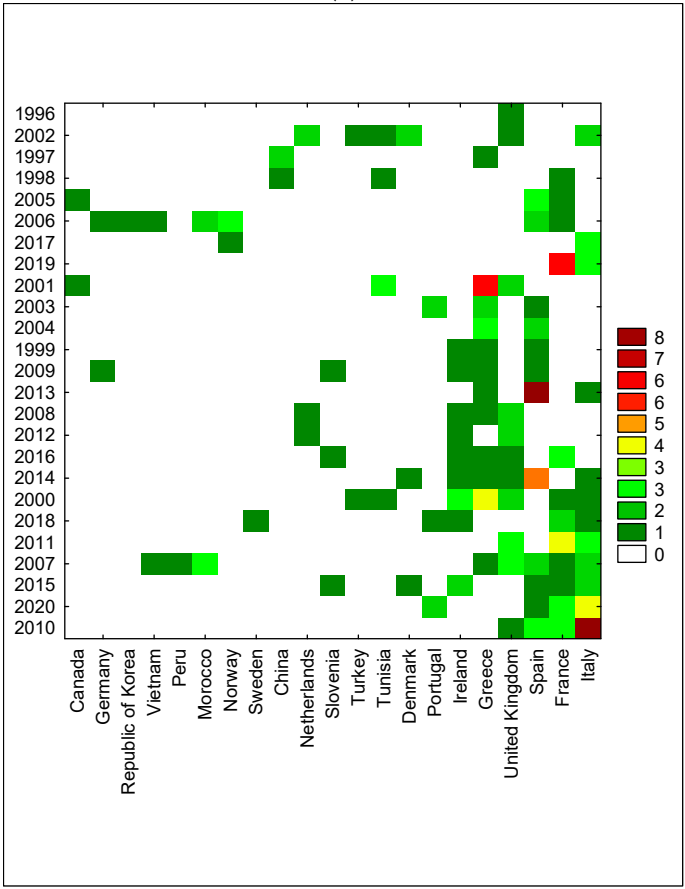

(c)

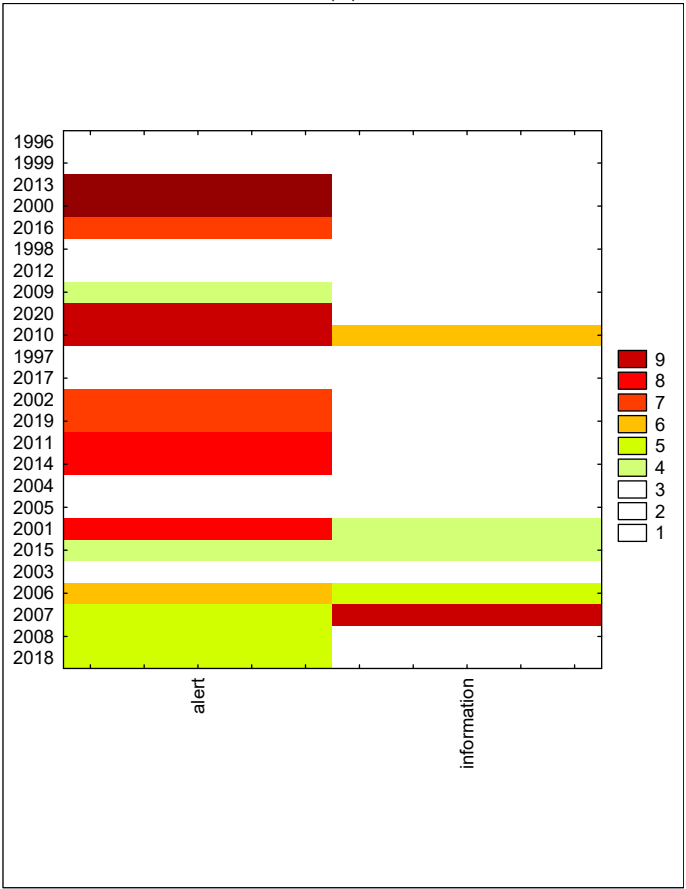

(d)

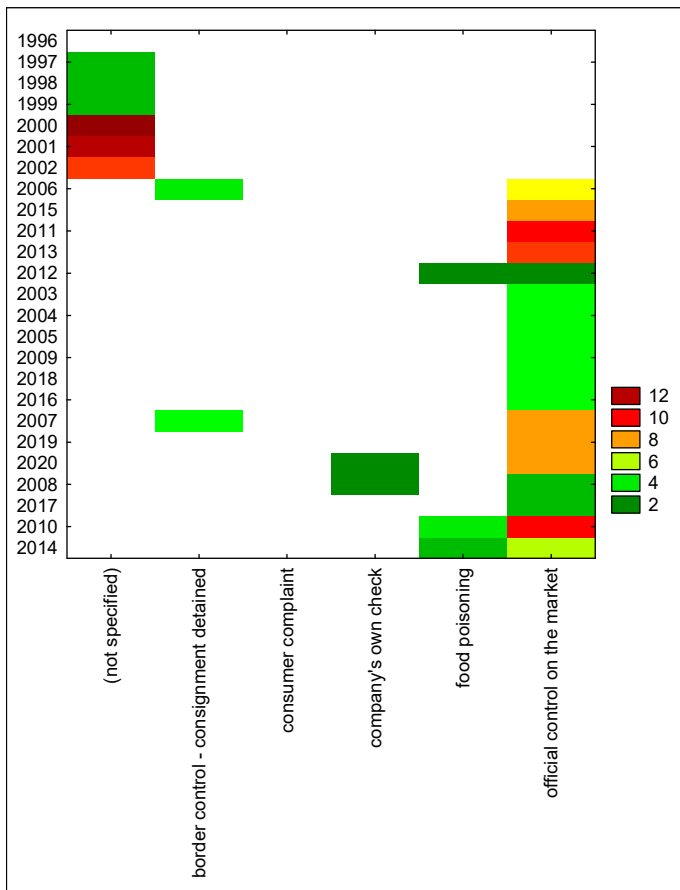

(e)

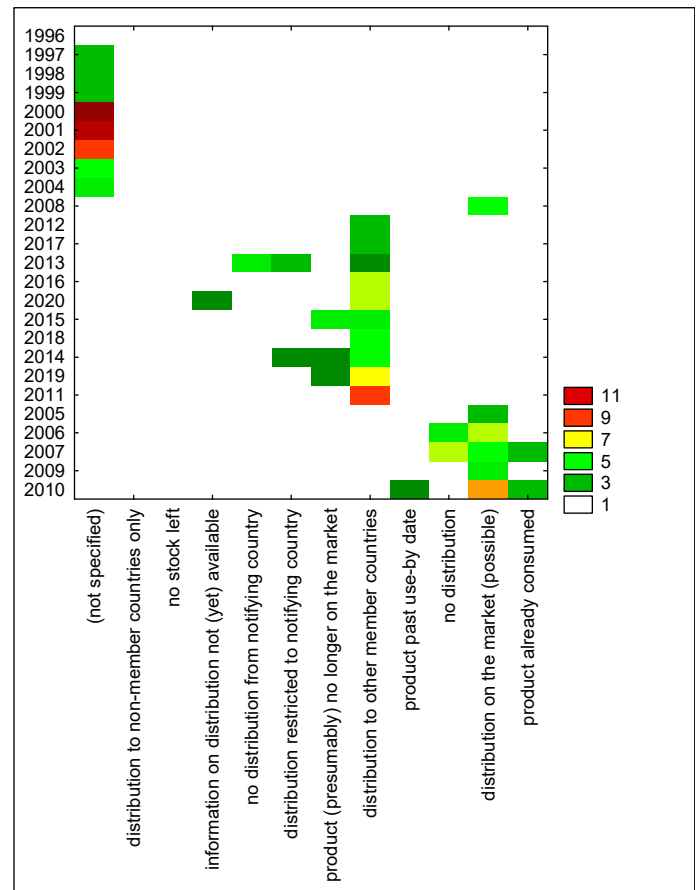

(f)

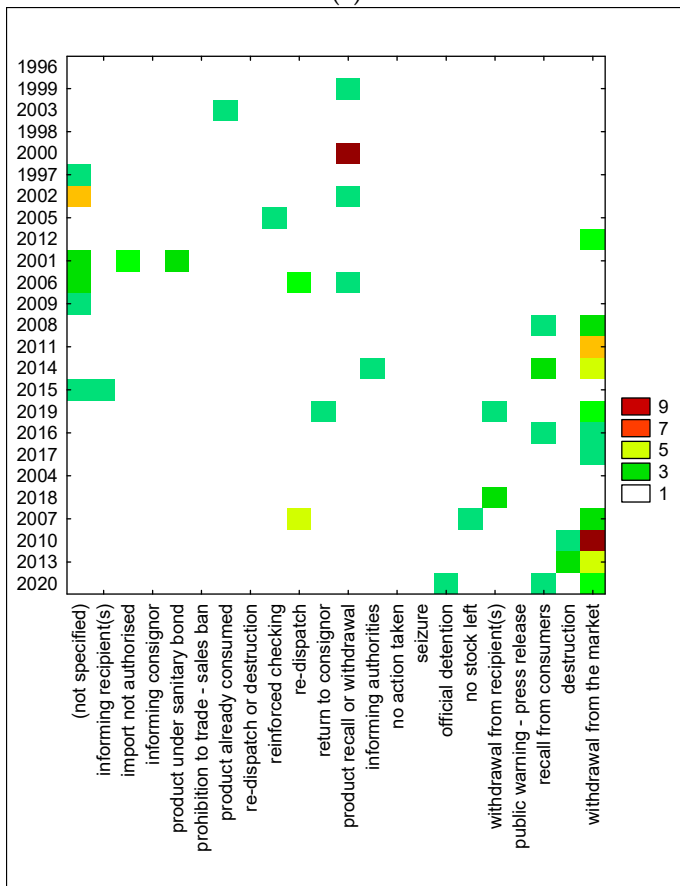

(g)

**Figure S21.** Results of two-way joining cluster analysis related to Diarrhoeic Shellfish Poisoning (DSP) toxins; (a) product; (b) notifying country; (c) country of origin; (d) notification type; (e) notification basis; (f) distribution status; (g) action taken.

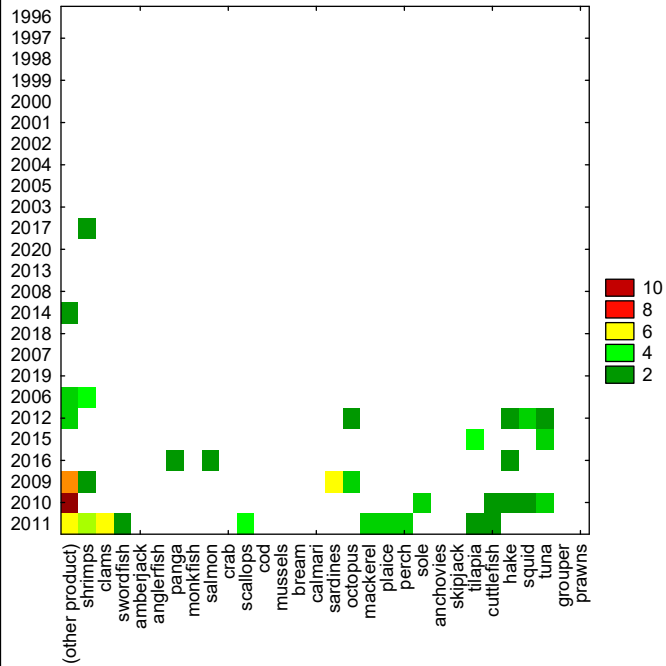

(a)

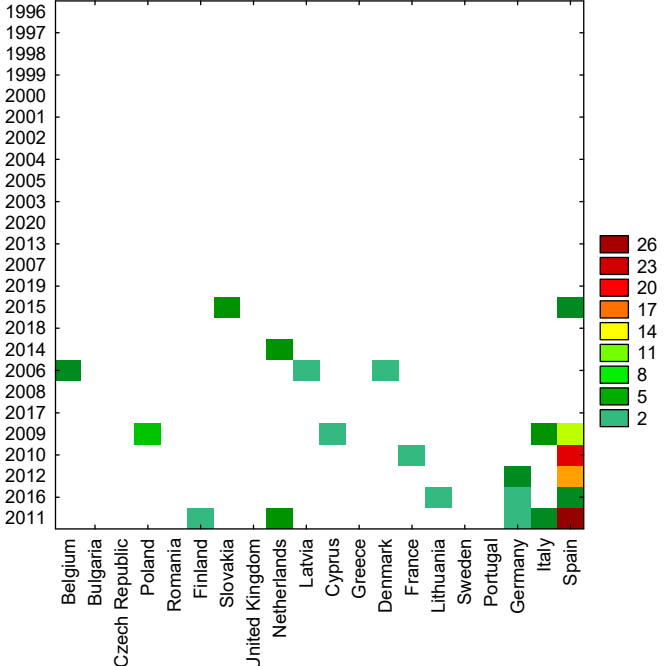

(b)

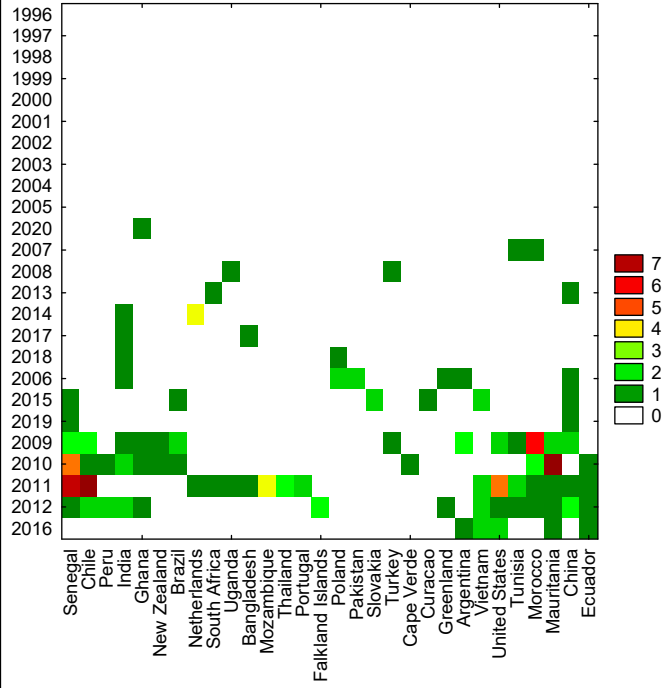

(c)

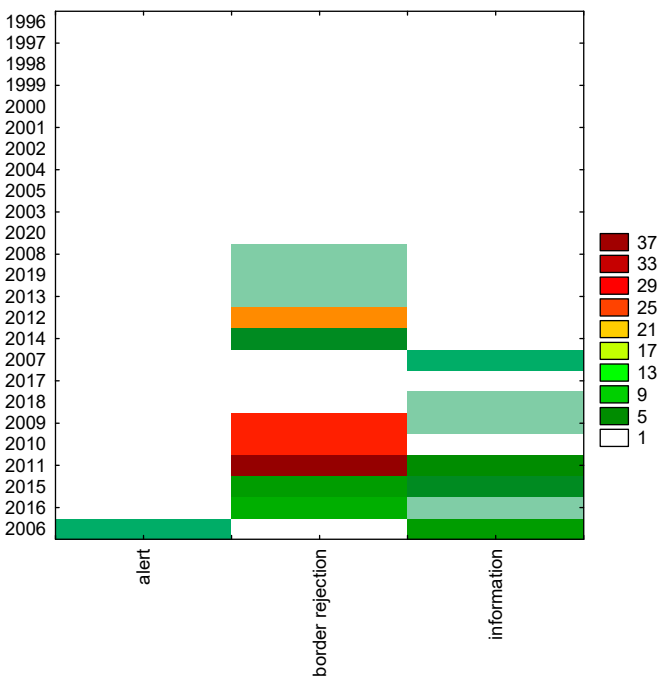

(d)

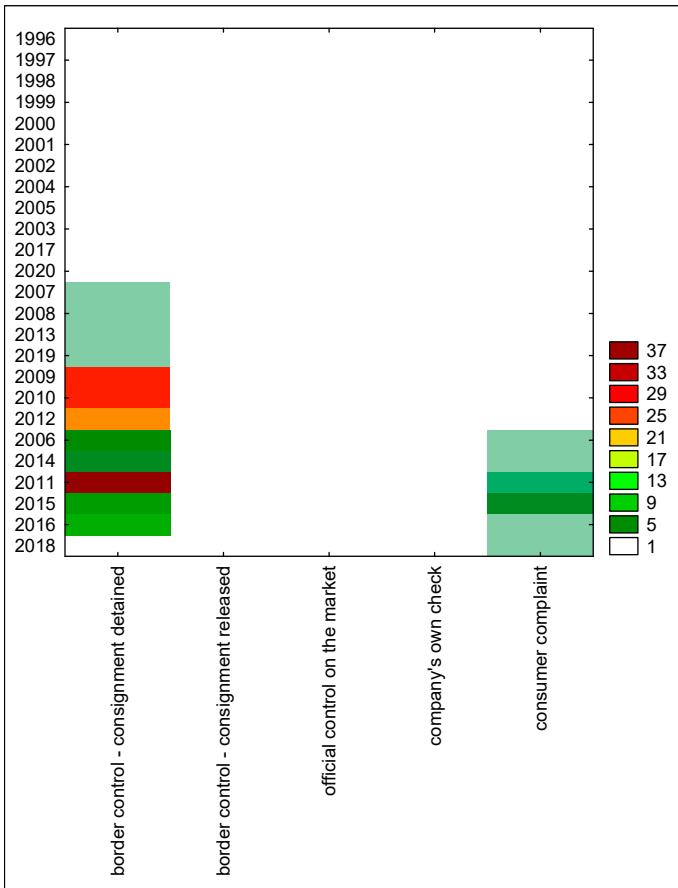

(e)

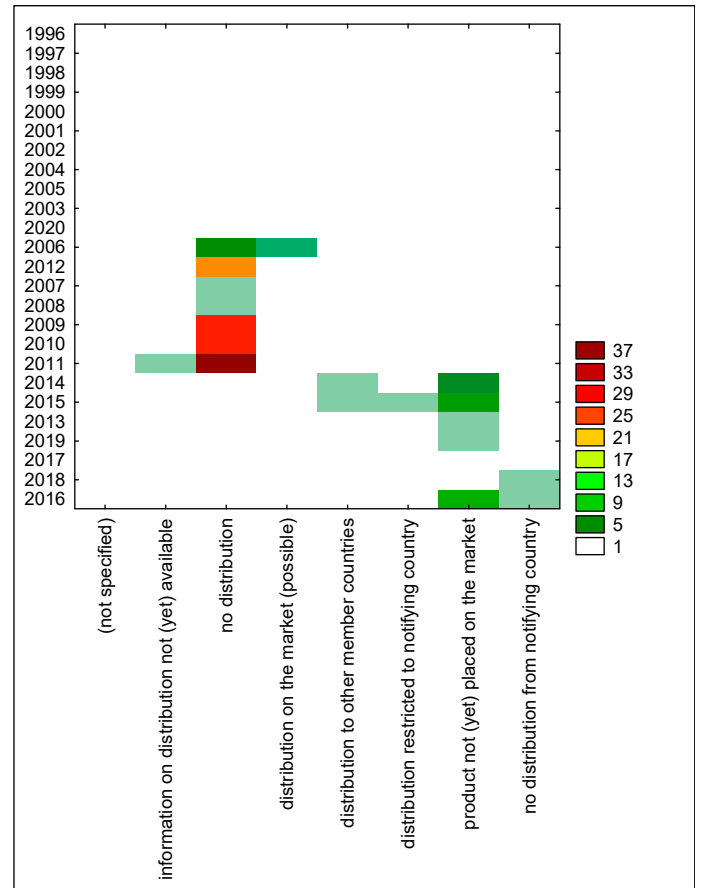

(f)

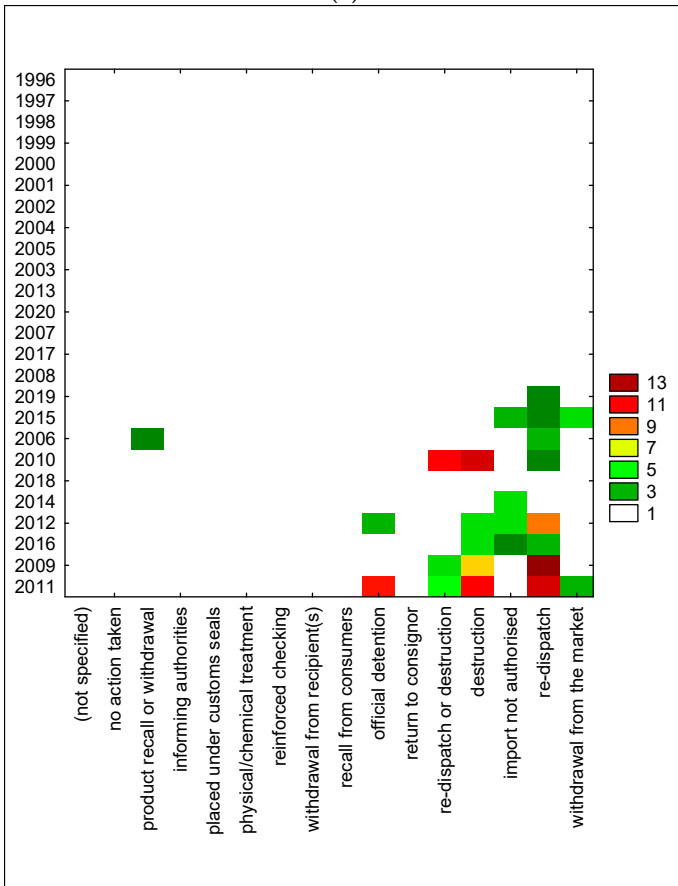

(g)

**Figure S22.** Results of two-way joining cluster analysis related to organoleptic characteristics; (a) product; (b) notifying country; (c) country of origin; (d) notification type; (e) notification basis; (f) distribution status; (g) action taken.

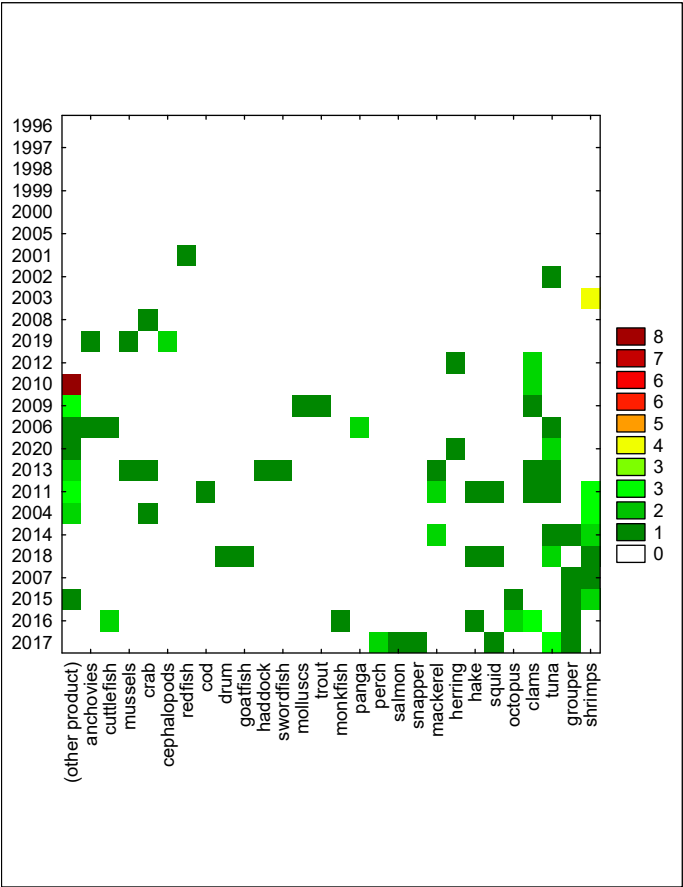

(a)

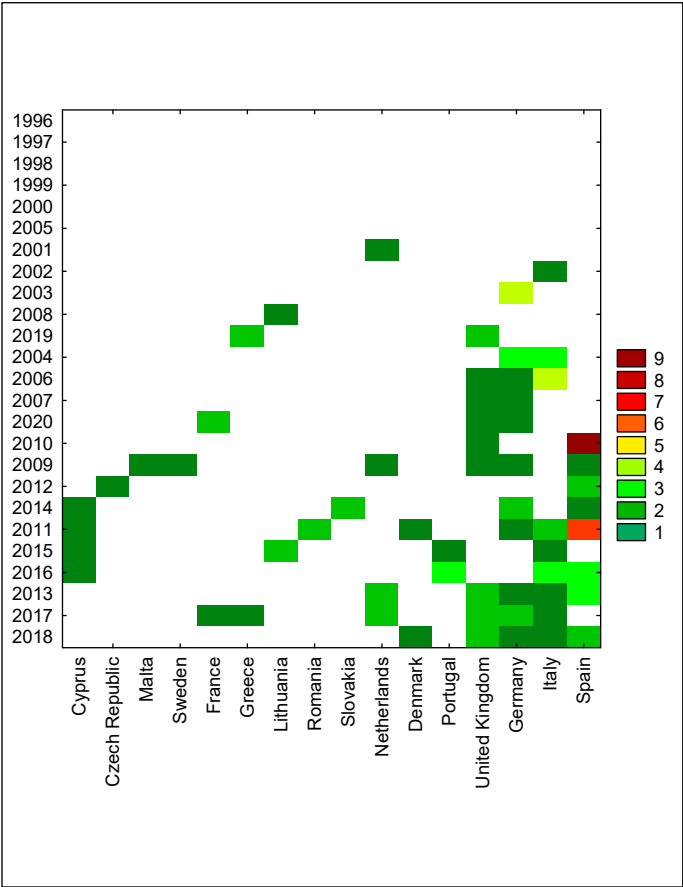

(b)

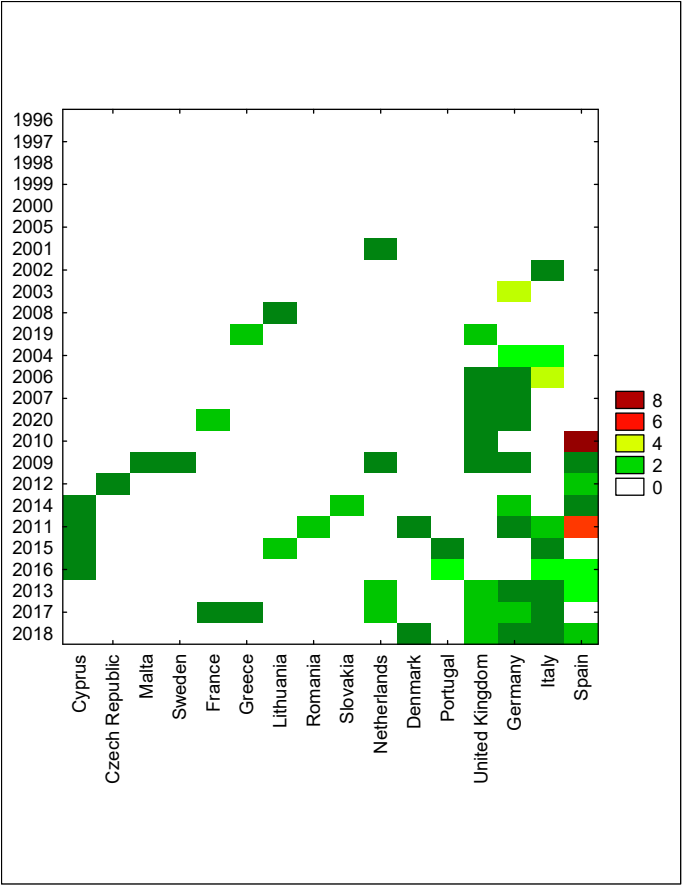

(c)

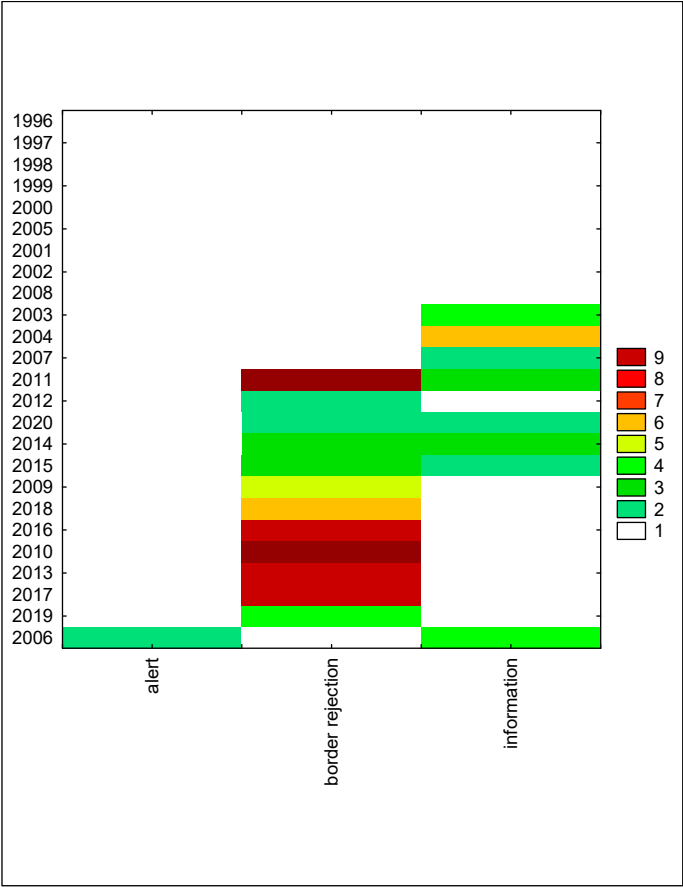

(d)

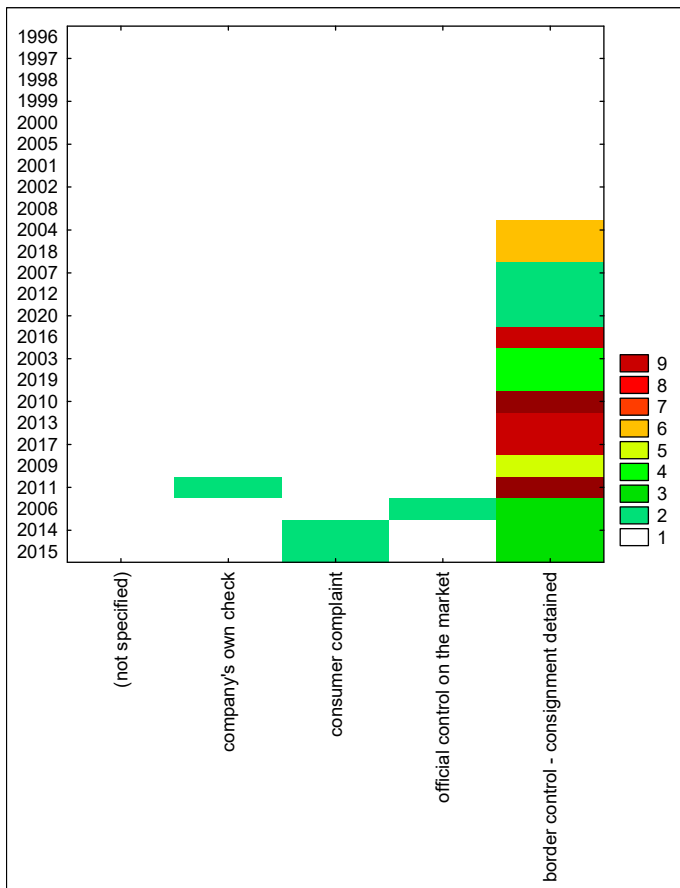

(e)

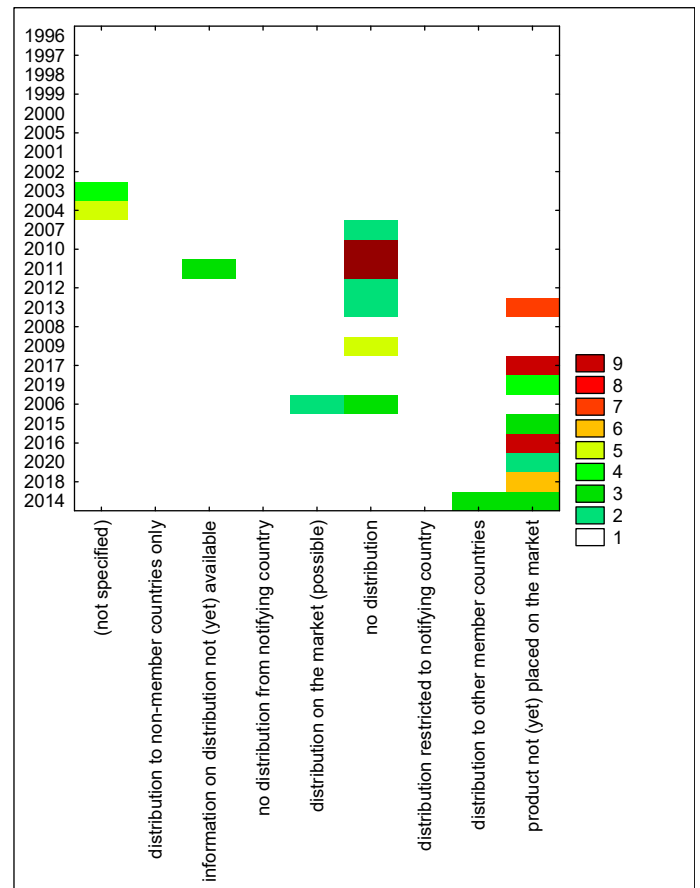

(f)

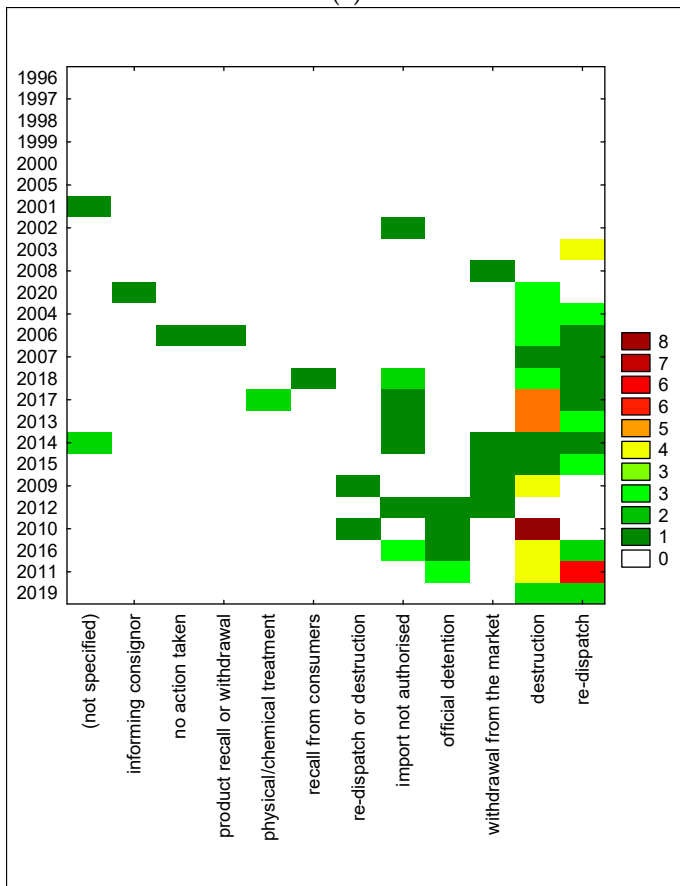

(g)

**Figure S23.** Results of two-way joining cluster analysis related to spoilage; (a) product; (b) notifying country; (c) country of origin; (d) notification type; (e) notification basis; (f) distribution status; (g) action taken.

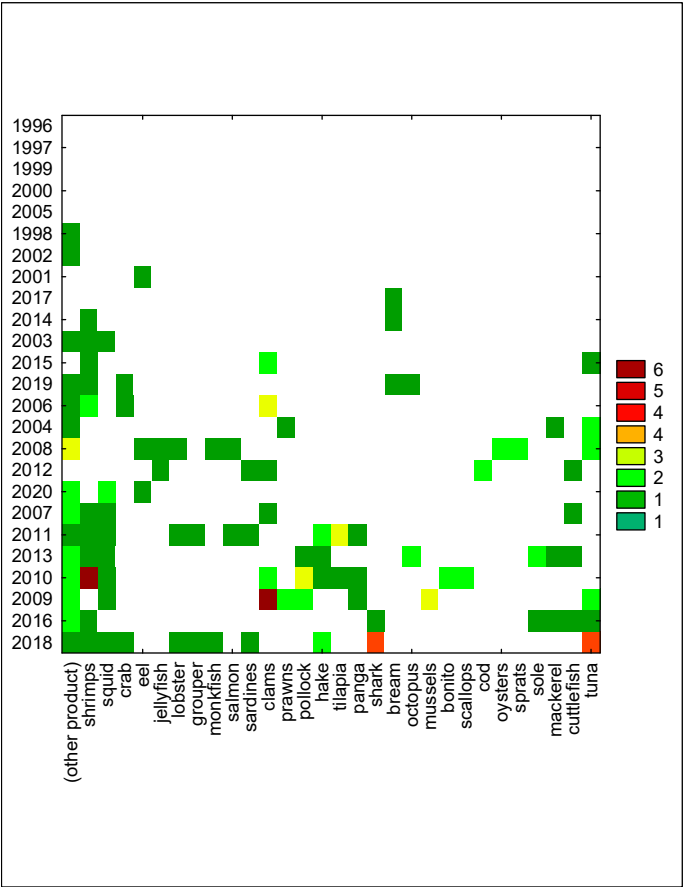

(a)

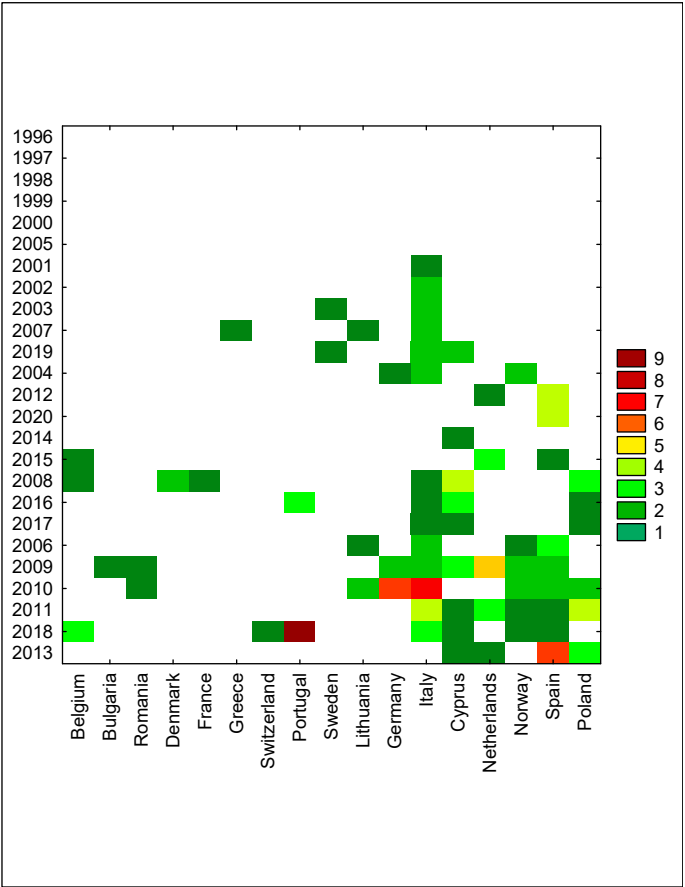

(b)

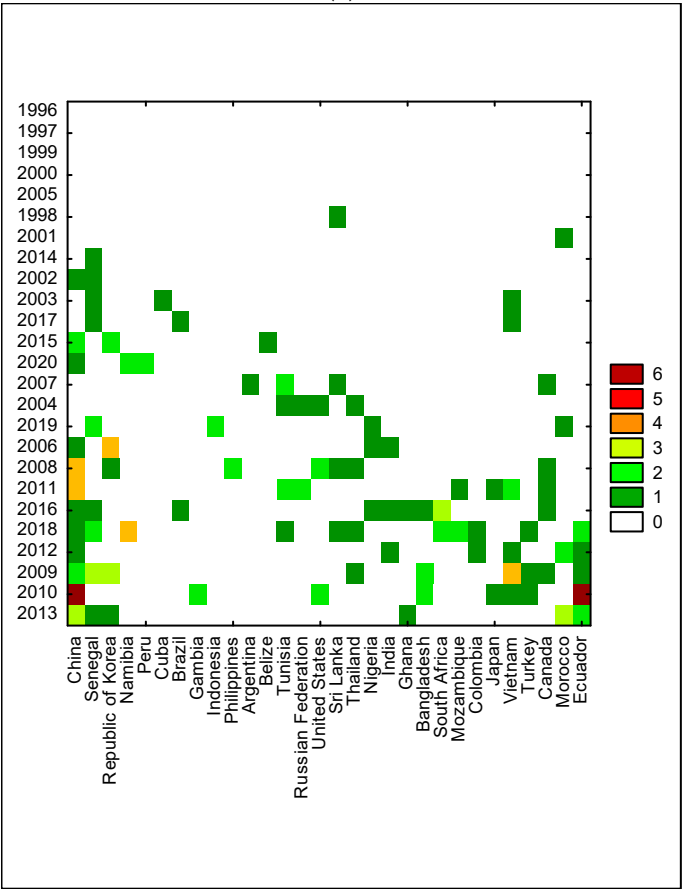

(c)

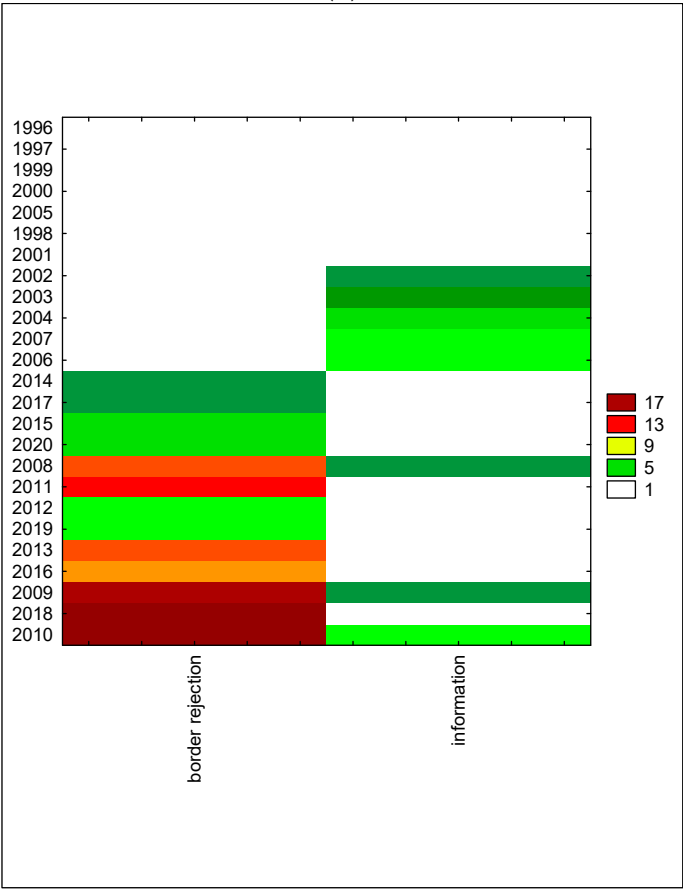

(d)

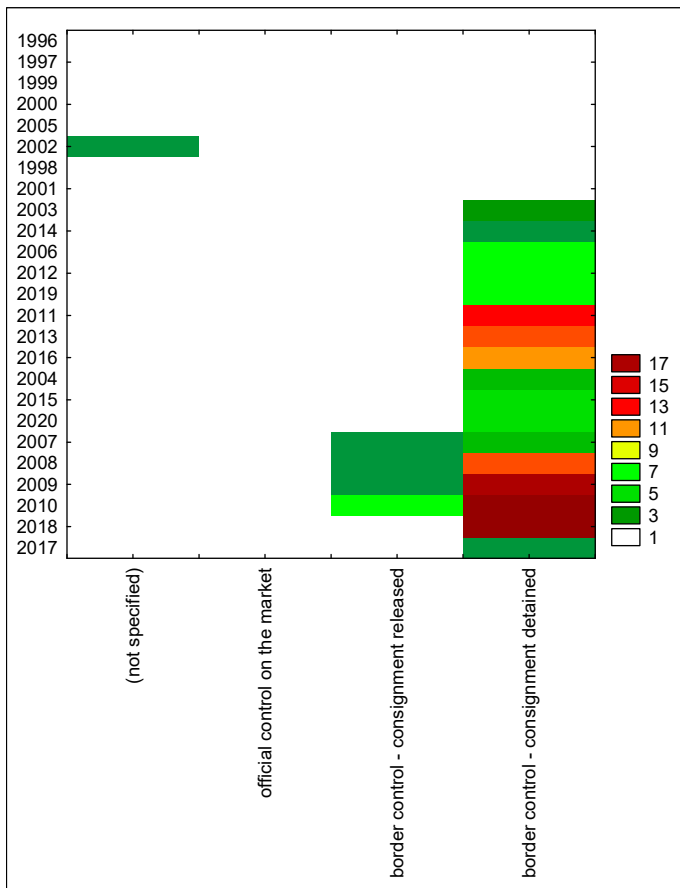

(e)

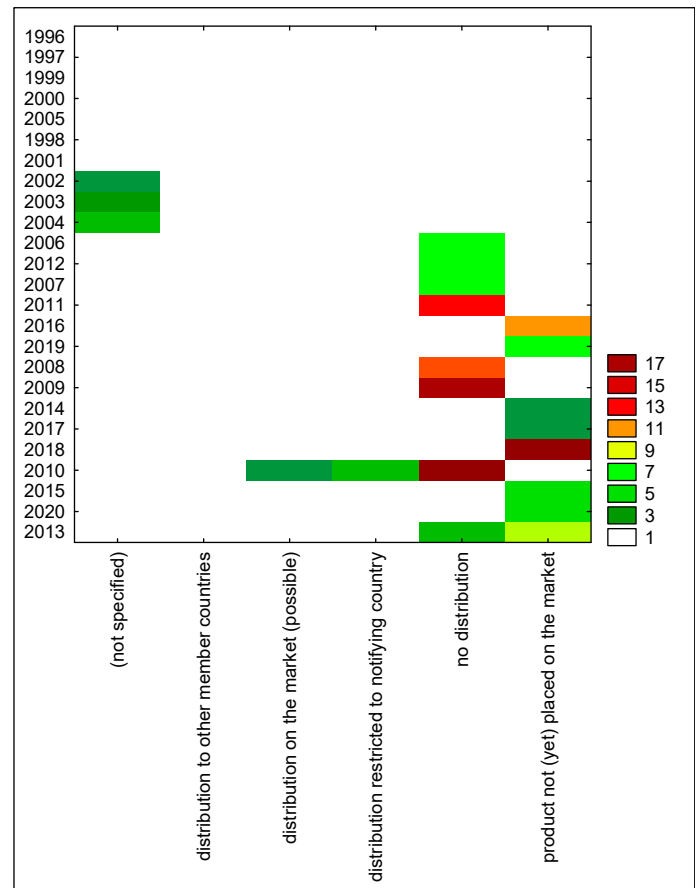

(f)

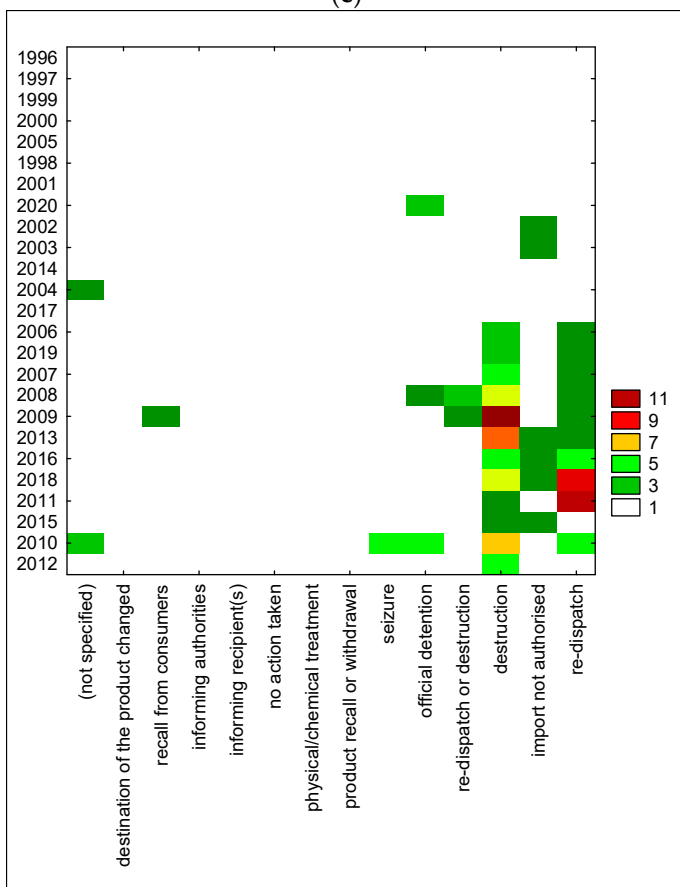

(g)

**Figure S24.** Results of two-way joining cluster analysis related to health certificate(s); (a) product; (b) notifying country; (c) country of origin; (d) notification type; (e) notification basis; (f) distribution status; (g) action taken.



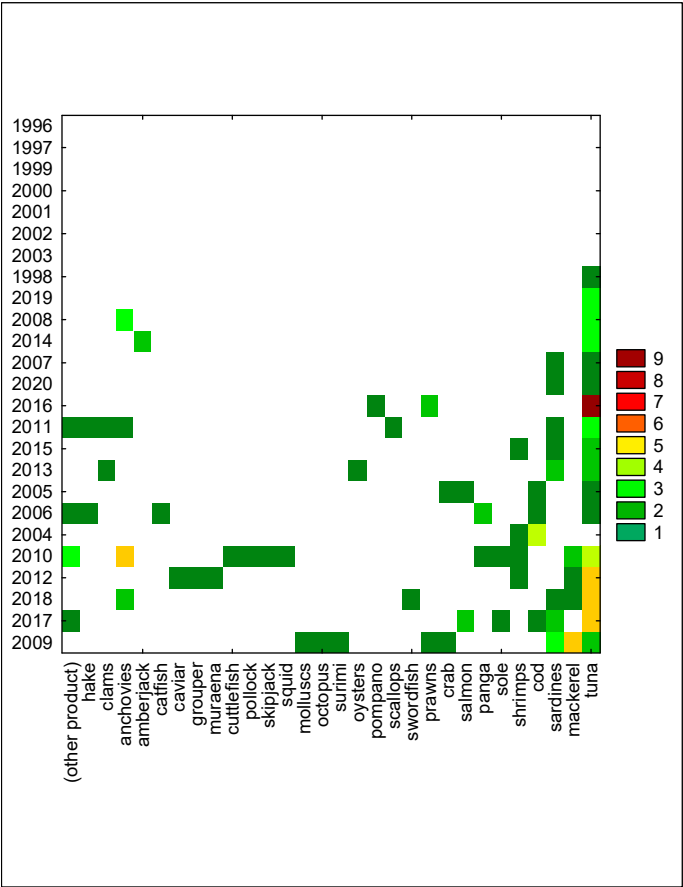

(a)

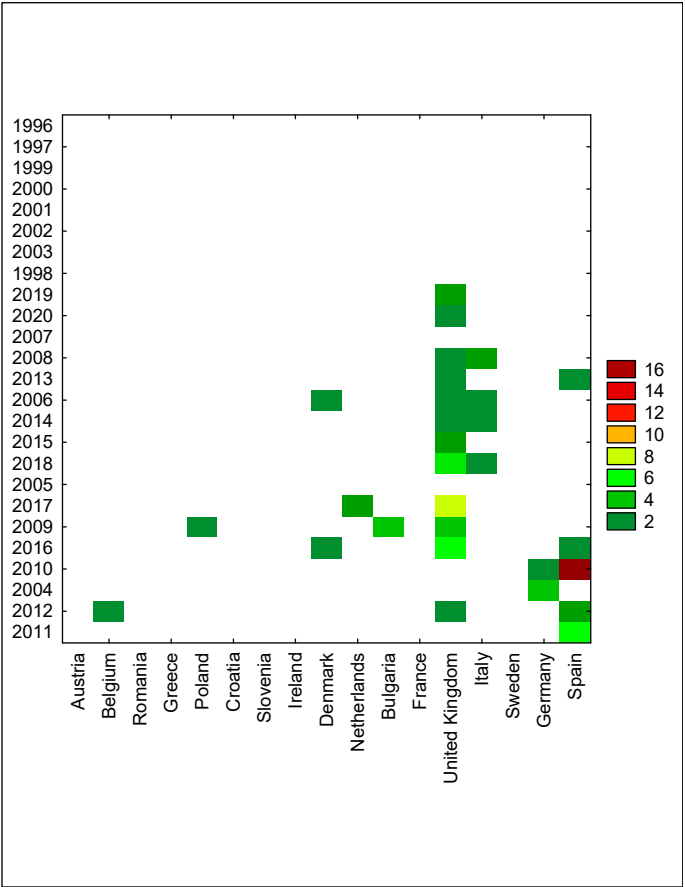

(b)

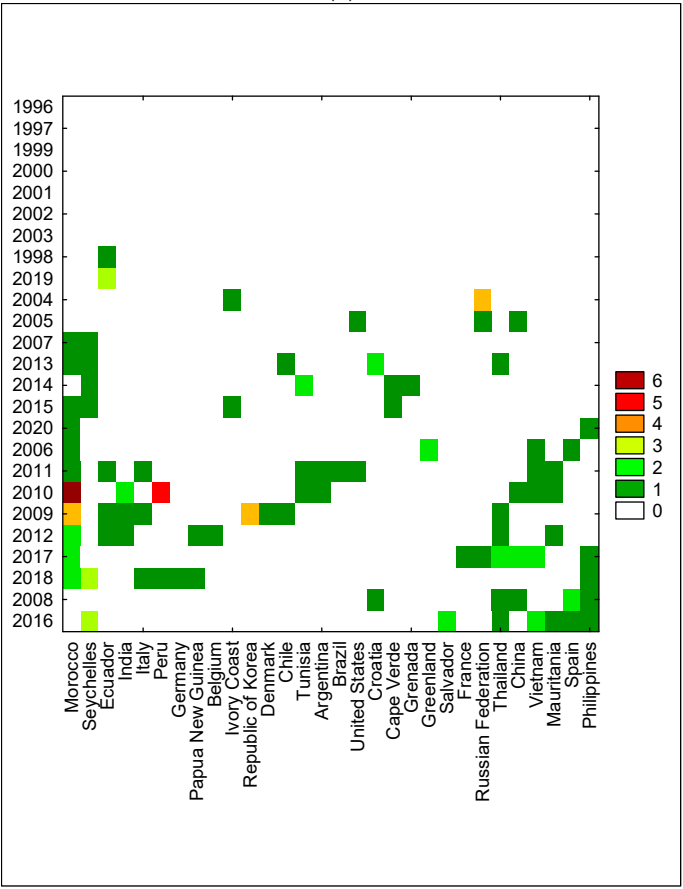

(c)

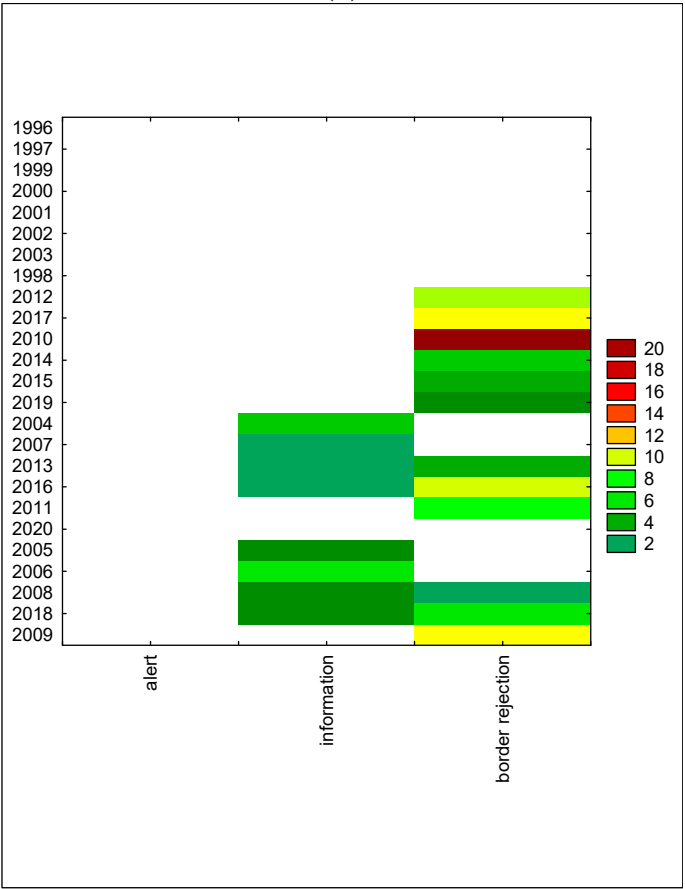

(d)

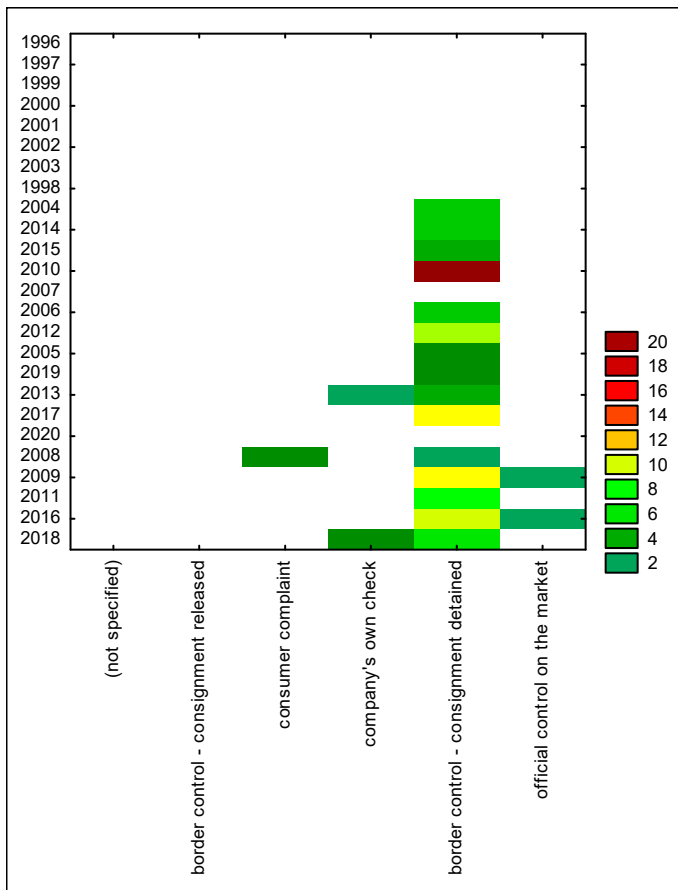

(e)

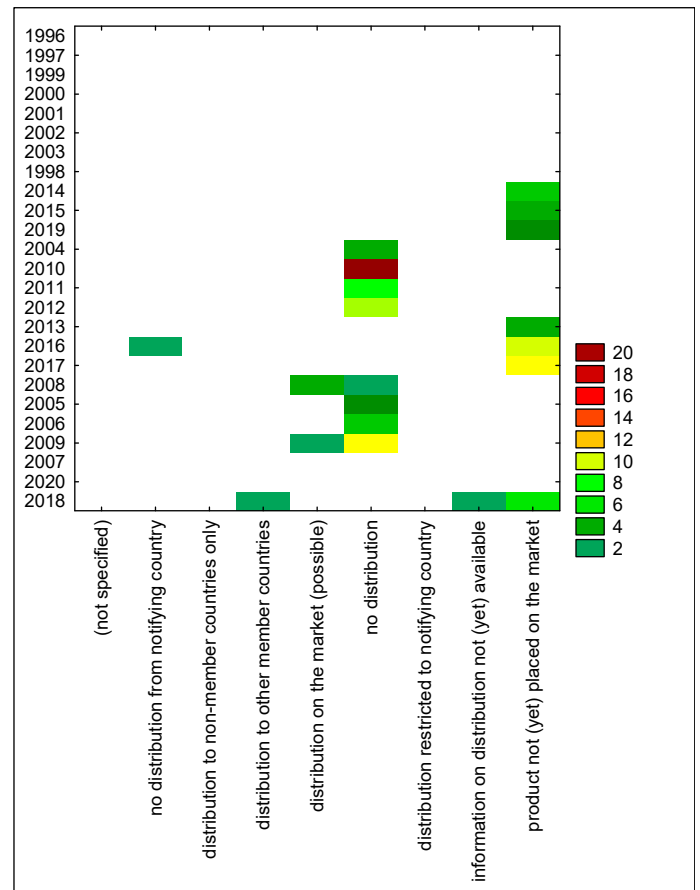

(f)

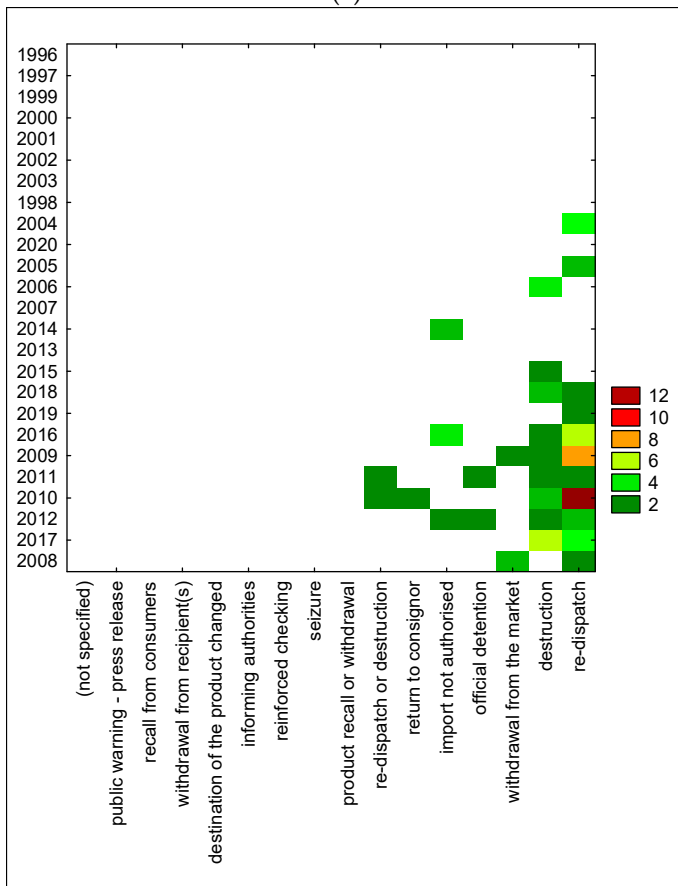

(g)

**Figure S25.** Results of two-way joining cluster analysis related to packaging; (a) product; (b) notifying country; (c) country of origin; (d) notification type; (e) notification basis; (f) distribution status; (g) action taken.

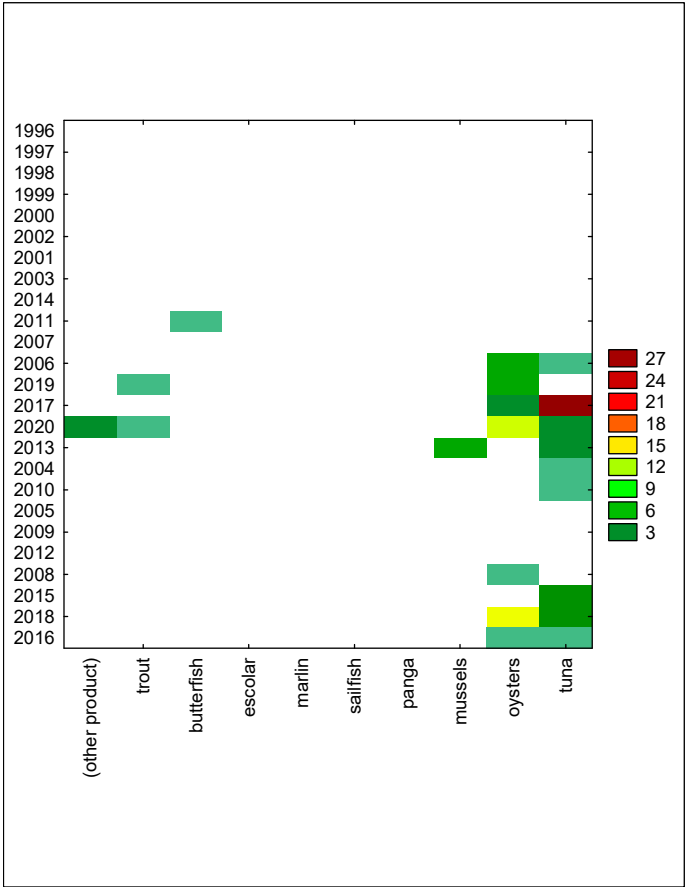

(a)

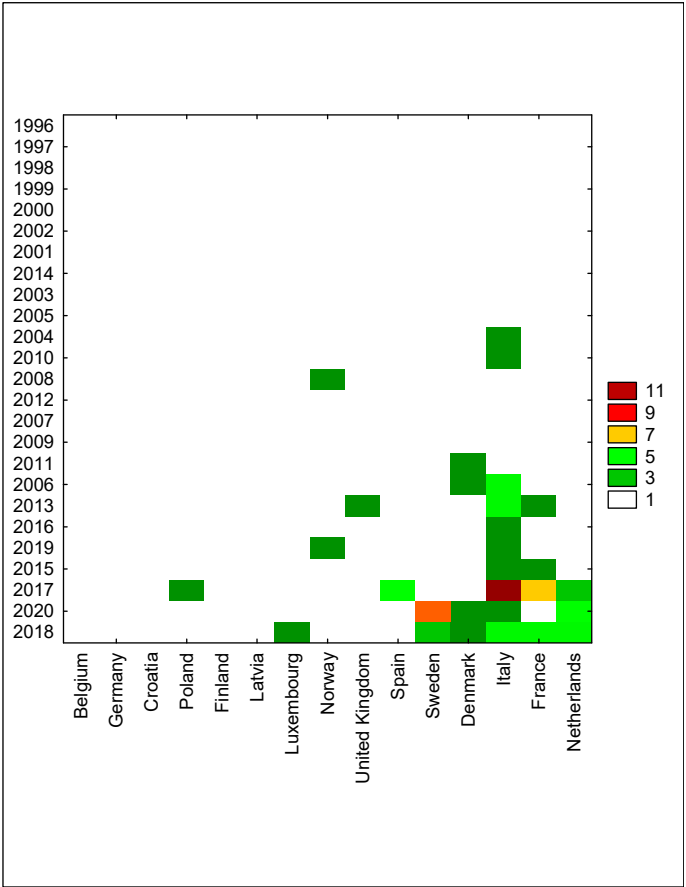

(b)

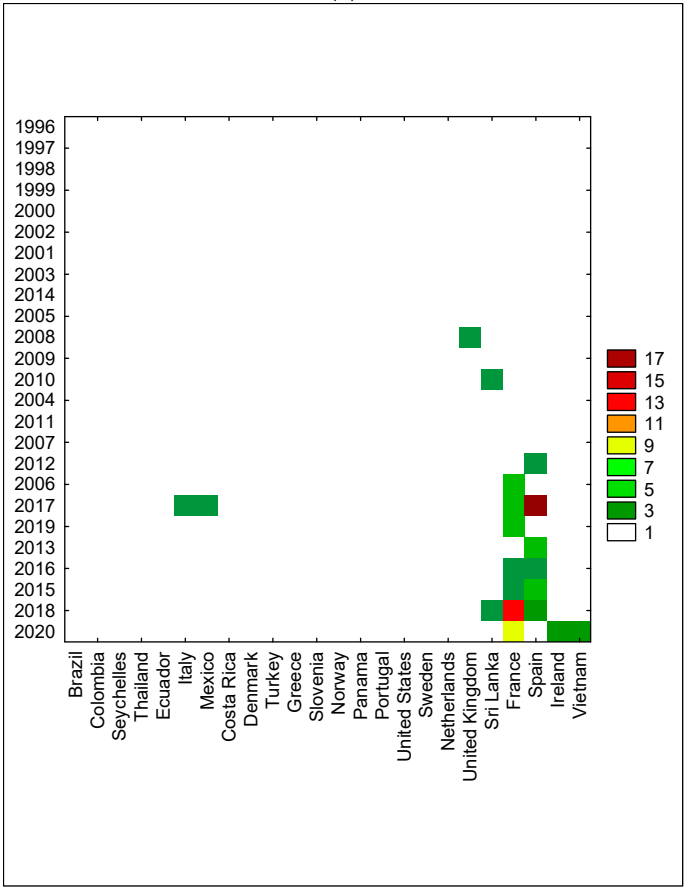

(c)

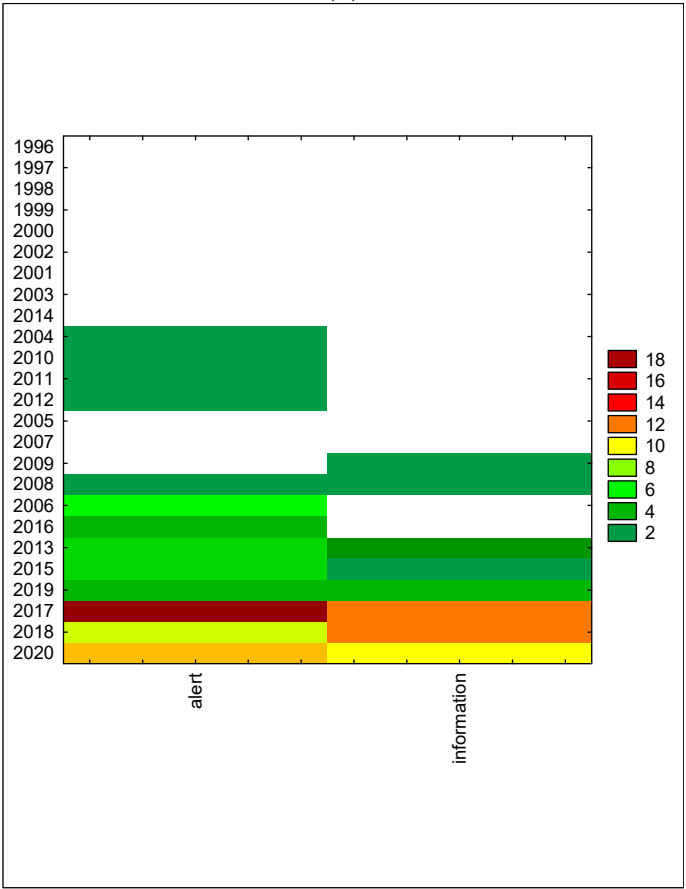

(d)

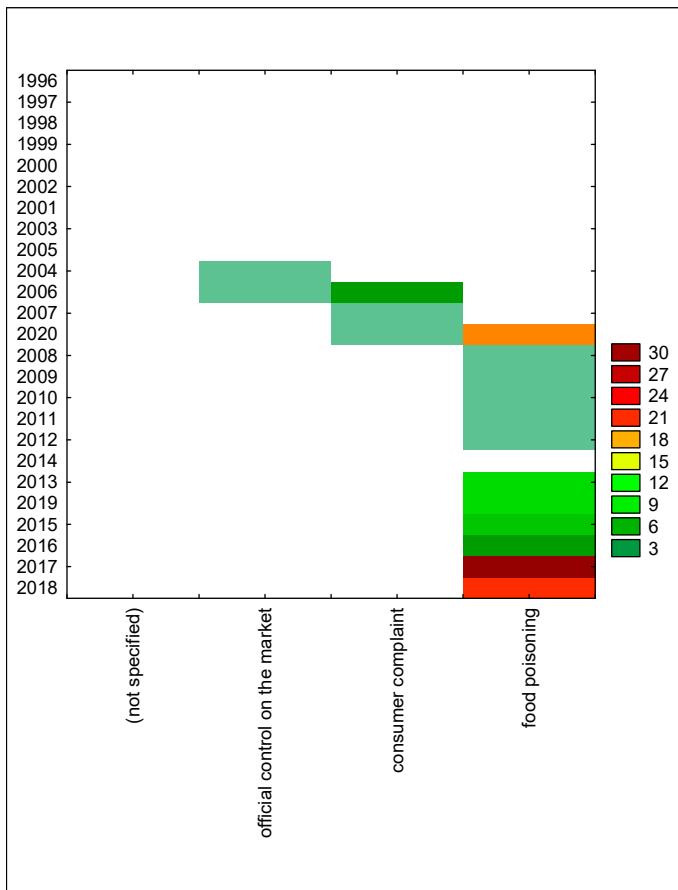

(e)

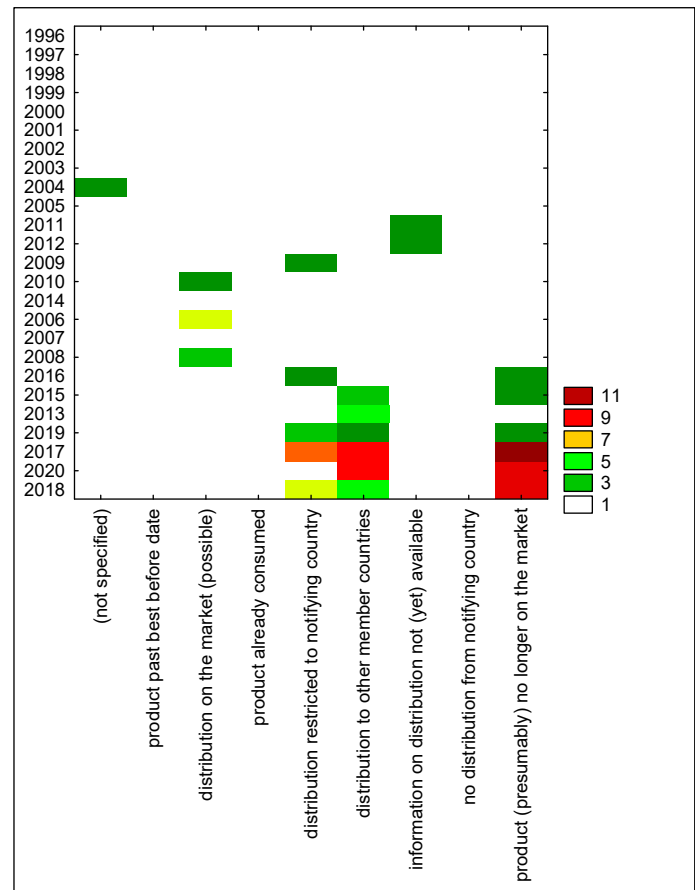

(f)

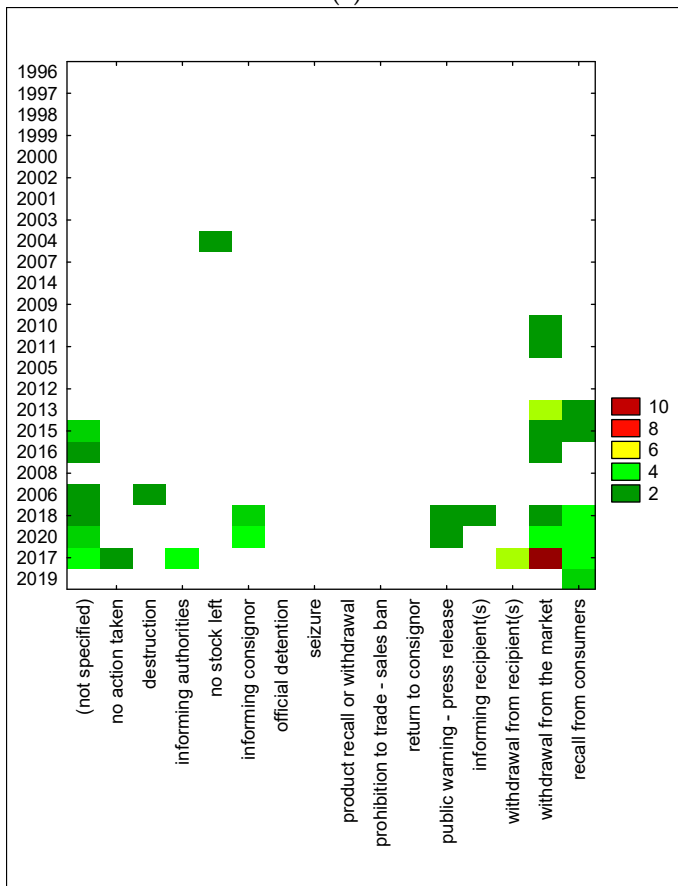

(g)

**Figure S26.** Results of two-way joining cluster analysis related to foodborne outbreak; (a) product; (b) notifying country; (c) country of origin; (d) notification type; (e) notification basis; (f) distribution status; (g) action taken.
